# Supplementary material for: Microbiome Sex-Related Diversity in Non-Muscle-Invasive Urothelial Bladder Cancer
Source: Curr Issues Mol Biol. 2024 Apr 19;46(4):3595–609. doi: 10.3390/cimb46040225 (PMC11048804; doi:10.3390/cimb46040225)
Supplement: Supplementary file 1 [file cimb-46-00225-s001.zip › Supplementary Table S1.xlsx]

## Sheet: bladder mucosa
Supplementary Table 1: Intergroup sex differences in the distribution of bacterial taxa across bladder mucosa
						Taxonomic level
OTU	counts in male group	counts in female group	fold change	pvalues	adjPvalues	Phylum	Family	Genus
Otu0510	92	280	4.26153	0.000198079	0.00516326	Firmicutes	Thermicanaceae	Thermicanus
Otu0124	7	465	3.62633	1.63108e-05	0.00115955	Firmicutes	Peptostreptococcaceae	Peptostreptococcus
Otu0092	276	2559	3.45758	8.43111e-05	0.00366285	Proteobacteria	Enterobacteriaceae	Salmonella
Otu0717	35	164	2.76393	0.0010035	0.0174386	Bacteroidota	Tannerellaceae	Tannerella
Otu0815	98	199	2.69098	0.00174165	0.0223274	Actinobacteriota	Microbacteriaceae	Frigoribacterium
Otu0445	286	396	2.57811	0.00113888	0.0185543	Firmicutes	Peptostreptococcaceae	Romboutsia
Otu0393	135	223	2.34635	0.00391994	0.0373829	Firmicutes	Oscillospiraceae	Oscillospiraceae_unclassified
Otu0521	16	209	2.118	0.00405308	0.0381868	Actinobacteriota	Coriobacteriia_unclassified	Coriobacteriia_unclassified
Otu0779	98	151	2.10909	0.000433125	0.00996187	Planctomycetota	Isosphaeraceae	Isosphaeraceae_unclassified
Otu0592	10	68	1.91131	0.00282189	0.0315246	Proteobacteria	Enterobacteriaceae	Pluralibacter
Otu1405	8	33	1.40588	0.00524736	0.0448113	Bacteroidota	Chitinophagaceae	uncultured
Otu0750	229	40	-1.67394	0.00435573	0.0405459	Chloroflexi	Chloroflexales_unclassified	Chloroflexales_unclassified
Otu1016	47	11	-1.74097	0.00440716	0.0405459	Actinobacteriota	Cellulomonadaceae	Cellulomonas
Otu0662	300	54	-1.7737	0.00247029	0.0279967	Verrucomicrobiota	Pedosphaeraceae	Pedosphaeraceae_unclassified
Otu1336	27	1	-1.77717	0.000788055	0.0154065	Bdellovibrionota	Bdellovibrionaceae	Bdellovibrionaceae_unclassified
Otu0067	14037	4931	-1.86079	0.00376157	0.0373829	Bacteroidota	Bacteroidia_unclassified	Bacteroidia_unclassified
Otu1199	76	9	-1.87555	0.00172804	0.0223274	Cyanobacteria	Vampirivibrionia_unclassified	Vampirivibrionia_unclassified
Otu0845	189	2	-1.8767	0.00493608	0.042889	Verrucomicrobiota	Verrucomicrobiaceae	Prosthecobacter
Otu0444	485	94	-1.92351	0.00527192	0.0448113	Patescibacteria	JGI_0000069-P22_fa	JGI_0000069-P22_ge
Otu0332	882	80	-1.94513	0.00460242	0.0413689	Proteobacteria	Hyphomicrobiaceae	Hyphomicrobiaceae_unclassified
Otu1132	53	15	-1.94638	0.00324521	0.0338367	Actinobacteriota	Kineosporiaceae	Kineosporiaceae_unclassified
Otu0565	496	47	-1.9584	0.0037303	0.0373829	Dependentiae	Vermiphilaceae	Vermiphilaceae_ge
Otu0358	1086	263	-1.97259	0.00381192	0.0373829	Proteobacteria	Hyphomonadaceae	Hirschia
Otu0794	227	38	-2.0265	0.00315977	0.033391	Actinobacteriota	Propionibacteriaceae	Microlunatus
Otu0539	516	79	-2.04546	0.00450789	0.0409904	Firmicutes	Clostridiaceae	Clostridium_sensu_stricto_9
Otu1064	73	6	-2.0685	0.0010006	0.0174386	Fibrobacterota	Fibrobacteraceae	Fibrobacteraceae_unclassified
Otu0908	87	0	-2.09714	0.00104243	0.0177214	Proteobacteria	Diplorickettsiaceae	Diplorickettsiaceae_unclassified
Otu0463	571	87	-2.11832	0.00489063	0.042889	Actinobacteriota	Nocardioidaceae	Aeromicrobium
Otu1030	124	3	-2.16872	0.000556632	0.0120913	Proteobacteria	Unknown_Family	Unknown_Family_unclassified
Otu0346	857	144	-2.20562	0.00169261	0.0223274	Proteobacteria	Beijerinckiaceae	Bosea
Otu0610	380	79	-2.23543	0.00133874	0.0205273	Firmicutes	Clostridiaceae	Clostridium_sensu_stricto_10
Otu0772	329	18	-2.24188	0.00303982	0.0325635	Myxococcota	Sandaracinaceae	Sandaracinaceae_unclassified
Otu0518	500	29	-2.25466	0.00209854	0.025286	Actinobacteriota	Gaiellales_unclassified	Gaiellales_unclassified
Otu0232	331	123	-2.27366	0.00293725	0.0319018	Firmicutes	Ruminococcaceae	Subdoligranulum
Otu0732	320	27	-2.28519	0.00203931	0.025286	Myxococcota	Sandaracinaceae	uncultured
Otu0531	203	54	-2.29031	0.00187427	0.02364	Firmicutes	Lachnospiraceae	Roseburia
Otu0335	955	108	-2.3259	0.00232812	0.027173	Proteobacteria	Hyphomonadaceae	SWB02
Otu0713	95	15	-2.34437	0.00121748	0.01943	Proteobacteria	Reyranellaceae	Reyranellaceae_unclassified
Otu0827	69	10	-2.35826	0.000395234	0.00936585	Proteobacteria	Sphingomonadaceae	Qipengyuania
Otu0930	179	6	-2.36553	1.61584e-05	0.00115955	Desulfobacterota	Desulfobacterota_unclassified	Desulfobacterota_unclassified
Otu0809	176	21	-2.39774	0.000633821	0.0127089	Proteobacteria	Sphingomonadaceae	Sandarakinorhabdus
Otu0236	647	66	-2.40995	0.00157973	0.0223274	Nitrospirota	Nitrospiraceae	Nitrospira
Otu0325	516	122	-2.4322	0.00469348	0.0417079	Bacteroidota	Rikenellaceae	Alistipes
Otu0519	377	69	-2.43517	0.00112275	0.0185543	Bacteroidota	Williamwhitmaniaceae	Acetobacteroides
Otu1076	120	1	-2.44576	0.00018118	0.00488561	Armatimonadota	Chthonomonadaceae	Chthonomonas
Otu0670	233	37	-2.47788	0.000866368	0.0161309	Actinobacteriota	Propionibacteriaceae	Tessaracoccus
Otu0826	219	26	-2.49565	0.00173527	0.0223274	Cyanobacteria	Cyanobiaceae	Cyanobium_PCC-6307
Otu0708	299	75	-2.50952	0.00385845	0.0373829	Proteobacteria	Chitinibacteraceae	Iodobacter
Otu0547	195	35	-2.51067	0.00163479	0.0223274	Proteobacteria	R7C24_fa	R7C24_ge
Otu0468	963	134	-2.52159	0.00158587	0.0223274	Bacteroidota	KD3-93	KD3-93_ge
Otu0420	445	108	-2.52992	0.00093733	0.0170463	Proteobacteria	Oxalobacteraceae	Collimonas
Otu0710	109	18	-2.53814	0.000613196	0.0126189	Firmicutes	Veillonellaceae	Megasphaera
Otu0528	431	56	-2.62004	0.00241387	0.0277595	Proteobacteria	Rhodocyclaceae	Ferribacterium
Otu0425	948	103	-2.62339	0.00210178	0.025286	Acidobacteriota	Holophagaceae	Geothrix
Otu0361	863	53	-2.63703	0.00372066	0.0373829	Proteobacteria	Hydrogenophilaceae	Tepidiphilus
Otu0648	173	99	-2.71225	0.00172873	0.0223274	Firmicutes	Aerococcaceae	Abiotrophia
Otu0653	129	40	-2.71417	0.000505426	0.0112927	Proteobacteria	Xanthobacteraceae	Tardiphaga
Otu0376	1306	87	-2.74768	0.000813659	0.0155191	Proteobacteria	Paracaedibacteraceae	Paracaedibacteraceae_unclassified
Otu0284	355	78	-2.76418	0.0016155	0.0223274	Proteobacteria	Vibrionaceae	Photobacterium
Otu0433	576	84	-2.786	0.00013022	0.00442748	Proteobacteria	Caulobacteraceae	Asticcacaulis
Otu0483	884	113	-2.8266	0.00292243	0.0319018	Cyanobacteria	Cyanobiaceae	Cyanobiaceae_unclassified
Otu0758	240	22	-2.84526	5.27999e-05	0.0025806	Fibrobacterota	Fibrobacteraceae	possible_genus_06
Otu0904	118	10	-2.87667	4.3118e-06	0.000561971	Actinobacteriota	Microbacteriaceae	Galbitalea
Otu0060	3373	424	-2.88176	0.00131356	0.0205273	Firmicutes	Peptostreptococcales-Tissierellales_fa	Ezakiella
Otu0774	210	36	-2.89314	0.00225341	0.0266995	Proteobacteria	Rhodobacteraceae	Gemmobacter
Otu0587	131	10	-2.8957	3.12877e-05	0.00174764	Proteobacteria	Methylomonadaceae	Methylomonadaceae_unclassified
Otu0351	950	174	-2.91353	0.000295824	0.0072292	Firmicutes	Caloramatoraceae	Fonticella
Otu0571	196	17	-3.02294	0.000101666	0.00397512	Campilobacterota	uncultured	uncultured_ge
Otu0657	285	31	-3.02692	0.000581665	0.0122936	Actinobacteriota	Streptomycetaceae	Streptomyces
Otu0395	731	49	-3.05303	1.83938e-05	0.00119866	Proteobacteria	Acetobacteraceae	Roseococcus
Otu0543	234	9	-3.05377	3.79387e-05	0.00197787	Proteobacteria	Rhizobiaceae	Mesorhizobium
Otu0668	201	45	-3.07682	0.000160086	0.00450908	Proteobacteria	Pasteurellaceae	Frederiksenia
Otu0853	223	17	-3.12406	0.00016145	0.00450908	Acidobacteriota	Elev-16S-1166_fa	Elev-16S-1166_ge
Otu0698	263	36	-3.21372	0.000245643	0.00619654	Firmicutes	Clostridiaceae	Clostridium_sensu_stricto_13
Otu0788	237	33	-3.21626	0.000112576	0.0040899	Proteobacteria	Reyranellaceae	uncultured
Otu0590	367	10	-3.22895	7.72661e-06	0.000788674	Cyanobacteria	Phormidiaceae	Phormidiaceae_unclassified
Otu0632	439	28	-3.22928	9.69949e-05	0.00397512	Proteobacteria	Nitrosomonadaceae	MND1
Otu0507	824	28	-3.28029	0.000148315	0.00450908	Proteobacteria	Yersiniaceae	Yersinia
Otu0359	1053	144	-3.28086	0.00137991	0.0207518	Proteobacteria	Yersiniaceae	Serratia
Otu0627	447	16	-3.35057	6.97407e-05	0.00320807	Proteobacteria	Rhodocyclaceae	Sulfuritalea
Otu0091	2549	152	-3.42682	0.00387995	0.0373829	Firmicutes	Veillonellaceae	Negativicoccus
Otu0745	262	1	-3.4478	8.06827e-06	0.000788674	Actinobacteriota	Microbacteriaceae	Clavibacter
Otu0570	491	3	-3.51512	2.42419e-05	0.00145824	Actinobacteriota	Micrococcaceae	Paeniglutamicibacter
Otu0243	607	91	-3.57036	0.000115061	0.0040899	Bacteroidota	Dysgonomonadaceae	Proteiniphilum
Otu0302	2358	40	-3.7497	0.000152882	0.00450908	Proteobacteria	Pleomorphomonadaceae	Pleomorphomonas
Otu0084	2594	78	-3.91968	0.000149261	0.00450908	Firmicutes	Peptostreptococcales-Tissierellales_fa	Murdochiella
Otu0400	446	19	-3.96254	1.49914e-05	0.00115955	Firmicutes	Selenomonadaceae	Megamonas
Otu0534	309	3	-4.28532	2.21745e-07	5.78016e-05	Actinobacteriota	Intrasporangiaceae	Ornithinimicrobium
Otu0759	379	6	-4.3362	1.50735e-06	0.000235749	Desulfobacterota	Bradymonadales_fa	Bradymonadales_ge
Otu0069	1147	29	-4.54448	1.15313e-06	0.000225436	Firmicutes	Peptococcaceae	Peptococcus
Otu0154	850	37	-5.18247	1.67277e-08	6.54053e-06	Firmicutes	Anaerovoracaceae	S5-A14a
Otu0157	838	0	-5.72705	7.52801e-09	5.8869e-06	Firmicutes	Peptostreptococcales-Tissierellales_fa	Gallicola

## Sheet: tumor tissues
Supplementary Table 1: Intergroup sex differences in the distribution of bacterial taxa across tumor tissues
						Taxonomic level
OTU	counts in male group	counts in female group	fold change	pvalues	adjPvalues	Phylum	Family	Genus
Otu0041	234	142071	3.8524	0.00499477	0.0355688	Firmicutes	Lachnospiraceae	Howardella
Otu0325	229	474	3.41352	9.52528e-05	0.00197509	Bacteroidota	Rikenellaceae	Alistipes
Otu0430	191	1211	2.94841	0.000990762	0.0116102	Bacteroidota	Weeksellaceae	Empedobacter
Otu0092	743	13267	2.89577	0.0054791	0.0367882	Proteobacteria	Enterobacteriaceae	Salmonella
Otu0970	25	90	2.73445	0.0013749	0.0146864	Planctomycetota	Schlesneriaceae	Planctopirus
Otu0475	215	530	2.72886	0.000732668	0.00939147	Proteobacteria	Xanthobacteraceae	Afipia
Otu0417	121	409	2.476	0.000568804	0.00742605	Proteobacteria	Unknown_Family	Acidibacter
Otu0451	55	357	2.34498	0.00460372	0.0338086	Firmicutes	Lachnospiraceae	Lachnospiraceae_NK4A136_group
Otu0618	15	205	2.2848	0.000493341	0.00681971	Proteobacteria	Comamonadaceae	Pseudorhodoferax
Otu0555	129	267	2.08008	0.00486626	0.0353682	Armatimonadota	Armatimonadaceae	Armatimonas
Otu0323	433	1171	1.87971	0.00144236	0.0151771	Firmicutes	Lachnospiraceae	Oribacterium
Otu0576	121	279	1.82179	0.00100457	0.0116102	Proteobacteria	Devosiaceae	Devosiaceae_unclassified
Otu0965	20	46	1.64975	0.00235001	0.0207124	Verrucomicrobiota	Parachlamydiaceae	Parachlamydiaceae_unclassified
Otu0275	689	187	-1.42559	0.00566338	0.0374677	Bacteroidota	Sphingobacteriales_unclassified	Sphingobacteriales_unclassified
Otu1078	72	7	-1.45053	0.00333871	0.026718	Proteobacteria	Sphingomonadaceae	Sphingoaurantiacus
Otu0950	59	5	-1.46966	0.00779658	0.0473844	Verrucomicrobiota	Opitutaceae	Opitutaceae_unclassified
Otu0249	441	52	-1.59197	0.00757427	0.0464335	Bacteroidota	Bacteroidota_unclassified	Bacteroidota_unclassified
Otu0554	145	40	-1.6134	0.0083283	0.0493379	Patescibacteria	Gracilibacteria_unclassified	Gracilibacteria_unclassified
Otu0995	62	4	-1.62928	0.000964264	0.0115221	Proteobacteria	Solimonadaceae	Solimonadaceae_unclassified
Otu0799	71	5	-1.68066	0.00183675	0.0172655	Actinobacteriota	uncultured	uncultured_ge
Otu0659	60	10	-1.68818	0.00214467	0.0198946	Gemmatimonadota	Gemmatimonadaceae	uncultured
Otu0711	118	36	-1.69623	0.0036268	0.0277463	Firmicutes	Lachnospirales_unclassified	Lachnospirales_unclassified
Otu0942	80	10	-1.71901	0.00357457	0.0276931	Proteobacteria	Comamonadaceae	Schlegelella
Otu0308	97	18	-1.79523	0.0067502	0.0428729	Proteobacteria	Oxalobacteraceae	Herbaspirillum
Otu1271	35	3	-1.80307	0.00155244	0.0154682	Verrucomicrobiota	Verrucomicrobiaceae	Verrucomicrobiaceae_unclassified
Otu0707	67	31	-1.81345	0.00839794	0.0493379	Bacteroidota	Marinilabiliaceae	Marinilabiliaceae_ge
Otu0238	224	26	-1.82868	0.00598911	0.0387369	Firmicutes	Erysipelotrichaceae	Erysipelotrichaceae_unclassified
Otu0403	416	136	-1.85191	0.0027108	0.0233062	Actinobacteriota	Tsukamurellaceae	Tsukamurella
Otu0470	171	45	-1.86293	0.0023091	0.0207124	Patescibacteria	Candidatus_Falkowbacteria_fa	Candidatus_Falkowbacteria_ge
Otu0494	186	37	-1.89002	0.00539221	0.0366071	Bacteroidota	Spirosomaceae	uncultured
Otu0856	52	29	-1.90089	0.00179679	0.0171181	Acidobacteriota	Blastocatellaceae	uncultured
Otu1032	71	37	-1.90189	0.00170706	0.016486	Actinobacteriota	Sporichthyaceae	Candidatus_Planktophila
Otu0423	270	46	-1.94535	0.00341974	0.026788	Proteobacteria	Sphingomonadaceae	Polymorphobacter
Otu0867	84	18	-1.94641	0.003329	0.026718	Bacteroidota	Prolixibacteraceae	Prolixibacteraceae_unclassified
Otu0732	47	24	-1.94662	0.00313158	0.0260821	Myxococcota	Sandaracinaceae	uncultured
Otu0176	1064	426	-1.95579	0.00493507	0.0355023	Firmicutes	Hungateiclostridiaceae	Hungateiclostridiaceae_unclassified
Otu0992	52	13	-1.96056	0.000863144	0.0104917	Planctomycetota	uncultured	uncultured_ge
Otu0686	77	34	-1.97779	0.00225506	0.0206469	Chloroflexi	JG30-KF-CM45	JG30-KF-CM45_ge
Otu0415	823	46	-2.02334	0.00726676	0.0453369	Firmicutes	Clostridiaceae	Clostridium_sensu_stricto_1
Otu0726	98	49	-2.03459	0.00525555	0.0366071	Verrucomicrobiota	Simkaniaceae	Simkaniaceae_unclassified
Otu0481	251	129	-2.04266	0.0054002	0.0366071	Firmicutes	Hungateiclostridiaceae	Ruminiclostridium
Otu0706	214	8	-2.06239	0.00314465	0.0260821	Cyanobacteria	Obscuribacteraceae	Candidatus_Obscuribacter
Otu0448	807	66	-2.06486	0.00791956	0.0477204	Actinobacteriota	Dermabacteraceae	Brachybacterium
Otu0582	135	41	-2.07216	0.00337291	0.026718	Proteobacteria	Beijerinckiaceae	1174-901-12
Otu0560	161	102	-2.07638	0.00803963	0.0480334	Spirochaetota	Spirochaetaceae	Spirochaeta_2
Otu0444	684	247	-2.07778	0.00742307	0.0459058	Patescibacteria	JGI_0000069-P22_fa	JGI_0000069-P22_ge
Otu0491	313	27	-2.11785	0.00235034	0.0207124	Myxococcota	Myxococcaceae	P3OB-42
Otu0760	76	7	-2.1533	0.000561226	0.00742605	Proteobacteria	Chitinibacteraceae	Deefgea
Otu0368	96	58	-2.15956	0.00435836	0.0323436	Firmicutes	Lachnospiraceae	Lachnoclostridium
Otu0738	186	77	-2.17989	0.00598459	0.0387369	Proteobacteria	Shewanellaceae	Shewanellaceae_unclassified
Otu0611	289	166	-2.2335	0.00692738	0.0436054	Proteobacteria	Beijerinckiaceae	FukuN57
Otu0826	56	0	-2.26285	3.34057e-05	0.000981291	Cyanobacteria	Cyanobiaceae	Cyanobium_PCC-6307
Otu0443	390	25	-2.29058	0.00117128	0.0131071	Actinobacteriota	Microtrichaceae	Microtrichaceae_unclassified
Otu0736	157	22	-2.29149	0.000298312	0.00477978	Gemmatimonadota	Gemmatimonadaceae	Gemmatimonadaceae_unclassified
Otu0060	2749	589	-2.29344	0.00409786	0.030734	Firmicutes	Peptostreptococcales-Tissierellales_fa	Ezakiella
Otu0564	342	184	-2.29753	0.00637439	0.040854	Bacteroidota	Weeksellaceae	Moheibacter
Otu0287	1649	745	-2.40977	0.00568659	0.0374677	Firmicutes	Selenomonadaceae	Selenomonas
Otu0629	161	114	-2.42376	0.00168627	0.016486	Planctomycetota	Planctomycetales_unclassified	Planctomycetales_unclassified
Otu0714	230	100	-2.47065	0.00248325	0.0216135	Proteobacteria	Paracaedibacteraceae	uncultured
Otu0442	358	151	-2.48758	0.000516927	0.00700834	Planctomycetota	Phycisphaeraceae	SM1A02
Otu0573	369	57	-2.51138	0.0010432	0.0118622	MBNT15	MBNT15_fa	MBNT15_ge
Otu0796	68	10	-2.51272	1.73898e-05	0.000612991	Spirochaetota	Spirochaetaceae	Treponema
Otu0807	253	2	-2.52528	0.000167944	0.0029772	Actinobacteriota	Solirubrobacterales_unclassified	Solirubrobacterales_unclassified
Otu0920	72	4	-2.53082	4.40051e-05	0.00114902	Actinobacteriota	Coriobacteriaceae	Coriobacteriaceae_unclassified
Otu0716	222	5	-2.55901	0.000454281	0.00640537	Proteobacteria	Enterobacteriaceae	Cedecea
Otu0513	556	12	-2.56752	0.00155779	0.0154682	Firmicutes	Lachnospiraceae	Lachnospiraceae_ge
Otu0227	1872	380	-2.60276	0.00148506	0.0153966	Proteobacteria	Hydrogenophilaceae	Hydrogenophilus
Otu0498	1072	18	-2.61246	0.00530573	0.0366071	Proteobacteria	Pseudomonadaceae	Azotobacter
Otu0196	3000	46	-2.64521	0.00509249	0.0359021	Actinobacteriota	Actinomycetaceae	Mobiluncus
Otu0562	612	50	-2.64889	0.00366015	0.0277463	Firmicutes	Peptostreptococcaceae	Filifactor
Otu0058	4045	417	-2.65069	0.00331983	0.026718	Proteobacteria	Alcaligenaceae	Alcaligenes
Otu0171	2363	383	-2.65844	0.0029442	0.0250079	Firmicutes	Peptostreptococcaceae	Peptostreptococcaceae_unclassified
Otu0845	108	3	-2.67911	1.5874e-05	0.000612991	Verrucomicrobiota	Verrucomicrobiaceae	Prosthecobacter
Otu0861	176	4	-2.67954	8.76895e-06	0.000492182	Proteobacteria	Sphingomonadaceae	Stakelama
Otu0297	116	4	-2.68874	1.174e-05	0.000551782	Firmicutes	Erysipelotrichales_unclassified	Erysipelotrichales_unclassified
Otu0887	68	14	-2.70652	4.06513e-05	0.00110228	Fusobacteriota	Leptotrichiaceae	uncultured
Otu0911	107	1	-2.72014	1.6006e-05	0.000612991	Actinobacteriota	Intrasporangiaceae	Aquipuribacter
Otu0677	152	276	-2.74794	0.0013274	0.0143972	Proteobacteria	Diplorickettsiaceae	Aquicella
Otu0790	173	30	-2.77875	5.77456e-05	0.00140382	Proteobacteria	Beijerinckiaceae	Microvirga
Otu0613	266	10	-2.80813	0.000194298	0.00326143	Proteobacteria	Unknown_Family	Candidatus_Ovatusbacter
Otu0540	179	134	-2.81221	0.000809882	0.0101958	Desulfobacterota	uncultured_fa	uncultured_ge
Otu0469	174	21	-2.82782	1.11259e-05	0.000551782	Verrucomicrobiota	Omnitrophaceae	Candidatus_Omnitrophus
Otu0280	1055	122	-2.8618	0.00129541	0.0142698	Actinobacteriota	Coriobacteriaceae	Collinsella
Otu0893	202	13	-2.89324	0.00023729	0.00389045	Firmicutes	Peptostreptococcaceae	Peptoclostridium
Otu0421	518	100	-2.92729	0.00151457	0.0154682	Firmicutes	Sporomusaceae	Pelosinus
Otu0671	364	69	-3.06765	0.000325521	0.00509983	Proteobacteria	Chitinibacteraceae	Chitinibacteraceae_unclassified
Otu0519	437	66	-3.08873	0.000176371	0.00303272	Bacteroidota	Williamwhitmaniaceae	Acetobacteroides
Otu0617	118	0	-3.10354	2.20209e-06	0.000305642	Bacteroidota	Tannerellaceae	Parabacteroides
Otu0276	288	38	-3.11201	0.000335833	0.00514701	Firmicutes	Christensenellaceae	Christensenellaceae_R-7_group
Otu0262	379	71	-3.14192	8.02357e-05	0.00180319	Patescibacteria	Parcubacteria_fa	Parcubacteria_ge
Otu0468	164	19	-3.15429	1.70578e-05	0.000612991	Bacteroidota	KD3-93	KD3-93_ge
Otu0516	461	119	-3.16924	6.85789e-05	0.0016116	Proteobacteria	Burkholderiaceae	Pandoraea
Otu0483	237	54	-3.21553	0.000168919	0.0029772	Cyanobacteria	Cyanobiaceae	Cyanobiaceae_unclassified
Otu0458	234	7	-3.22856	5.66717e-06	0.000363214	Proteobacteria	CCM19a_fa	CCM19a_ge
Otu0566	137	9	-3.22995	3.46828e-06	0.000305642	Myxococcota	Nannocystaceae	Nannocystaceae_unclassified
Otu0822	137	24	-3.23963	0.000115997	0.00233652	Dependentiae	Babeliaceae	Babeliaceae_ge
Otu0697	170	34	-3.25265	0.000143197	0.00265742	Proteobacteria	Acetobacteraceae	Rhodovastum
Otu0484	272	236	-3.27775	0.00085833	0.0104917	Bdellovibrionota	Oligoflexales_fa	Oligoflexus
Otu0628	257	14	-3.29574	2.88549e-06	0.000305642	Firmicutes	Anaerovoracaceae	Anaerovoracaceae_ge
Otu0630	203	15	-3.29818	3.09555e-06	0.000305642	Proteobacteria	Yersiniaceae	Yersiniaceae_unclassified
Otu0553	91	2	-3.3309	7.24808e-08	2.55495e-05	Bacteroidota	Weeksellaceae	Elizabethkingia
Otu0737	344	22	-3.41244	2.81422e-05	0.000944773	Chloroflexi	Gitt-GS-136_fa	Gitt-GS-136_ge
Otu0463	681	105	-3.41924	3.62884e-05	0.00102333	Actinobacteriota	Nocardioidaceae	Aeromicrobium
Otu0499	325	65	-3.5096	9.23504e-05	0.00197294	Bacteroidota	Prolixibacteraceae	BSV13
Otu0644	211	87	-3.54501	0.000143237	0.00265742	Proteobacteria	Hyphomicrobiaceae	Pedomicrobium
Otu0330	2448	102	-3.61693	0.000432148	0.00621764	Bacteroidota	Prevotellaceae	Prevotellaceae_UCG-001
Otu0210	371	9	-3.64784	4.14177e-06	0.000324438	Firmicutes	Staphylococcaceae	Nosocomiicoccus
Otu0681	248	30	-3.6667	1.9309e-06	0.000305642	Proteobacteria	Caulobacteraceae	uncultured
Otu0124	701	79	-3.68339	9.0757e-06	0.000492182	Firmicutes	Peptostreptococcaceae	Peptostreptococcus
Otu0157	1218	171	-3.70972	0.00038181	0.00571486	Firmicutes	Peptostreptococcales-Tissierellales_fa	Gallicola
Otu0154	2549	51	-3.72325	0.000389097	0.00571486	Firmicutes	Anaerovoracaceae	S5-A14a
Otu0360	482	89	-3.79421	0.000131431	0.00257385	Firmicutes	Bacillaceae	Geobacillus
Otu0373	681	74	-3.88325	3.10911e-05	0.000981291	Proteobacteria	Rhodobacteraceae	Amaricoccus
Otu0294	1501	87	-4.00075	3.20291e-05	0.000981291	Firmicutes	Lachnospiraceae	Agathobacter
Otu0091	989	164	-4.03249	5.30775e-05	0.00133641	Firmicutes	Veillonellaceae	Negativicoccus
Otu0069	2406	16	-4.14625	8.1847e-05	0.00180319	Firmicutes	Peptococcaceae	Peptococcus
Otu0598	298	0	-4.33616	5.13016e-09	3.61676e-06	Actinobacteriota	Sporichthyaceae	Longivirga
Otu0318	1099	0	-4.43249	5.04126e-06	0.000355409	Proteobacteria	Pseudoalteromonadaceae	Pseudoalteromonas
Otu0247	3112	13	-4.59397	1.35075e-05	0.000595172	Firmicutes	Bacillaceae	Aeribacillus
Otu0084	4405	183	-5.62544	6.45142e-07	0.000151608	Firmicutes	Peptostreptococcales-Tissierellales_fa	Murdochiella

## Sheet: urine samples
Supplementary Table 1: Intergroup sex differences in the distribution of bacterial taxa across urine samples
						Taxonomic level
OTU	counts in male group	counts in female group	fold change	pvalues	adjPvalues	Phylum	Family	Genus
Otu0541	48	415	5.29025	3.00845e-06	0.000345972	Proteobacteria	Methylophilaceae	Candidatus_Methylopumilus
Otu0270	107	1679	5.13529	1.32928e-05	0.000679409	Actinobacteriota	Dietziaceae	Dietzia
Otu0451	277	1800	3.87785	0.000230977	0.00312499	Firmicutes	Lachnospiraceae	Lachnospiraceae_NK4A136_group
Otu0128	670	719	3.85032	5.77067e-05	0.00147473	Proteobacteria	Acetobacteraceae	Acetobacteraceae_unclassified
Otu0299	21	144	3.68099	4.66621e-05	0.00134154	Proteobacteria	Sphingomonadaceae	Sphingopyxis
Otu0539	30	236	3.67327	1.9286e-05	0.000799437	Firmicutes	Clostridiaceae	Clostridium_sensu_stricto_9
Otu0252	115	459	3.65159	1.24088e-07	2.85403e-05	Proteobacteria	A0839	A0839_ge
Otu0273	48	210	3.48179	0.000215388	0.00300238	Actinobacteriota	Nocardioidaceae	Marmoricola
Otu0293	43	283	3.46656	0.000153398	0.00238821	Actinobacteriota	Microbacteriaceae	Aurantimicrobium
Otu0766	19	165	3.37622	2.25928e-05	0.000799437	Elusimicrobiota	Lineage_IIc_fa	Lineage_IIc_ge
Otu0421	13	186	3.35783	8.39788e-06	0.000551861	Firmicutes	Sporomusaceae	Pelosinus
Otu0233	99	370	3.34664	4.47556e-06	0.000411752	Bacteroidota	Sphingobacteriaceae	Sphingobacteriaceae_unclassified
Otu0242	293	1093	3.33897	0.00356828	0.0209477	Firmicutes	Paenibacillaceae	Paenibacillus
Otu0271	37	264	3.231	9.20064e-05	0.0016966	Proteobacteria	Methylophilaceae	Methylophilus
Otu0225	59	355	3.17741	9.09262e-05	0.0016966	Proteobacteria	Rhodocyclaceae	C39
Otu0327	167	481	3.12228	0.000155753	0.00238821	Actinobacteriota	Ilumatobacteraceae	Ilumatobacter
Otu0612	26	146	3.12034	0.000403034	0.00463489	Chloroflexi	A4b	A4b_unclassified
Otu0129	166	1015	3.07125	1.81089e-05	0.000799437	Proteobacteria	Xanthomonadaceae	Stenotrophomonas
Otu0615	42	210	3.04114	0.000628032	0.00589581	Actinobacteriota	Nocardiaceae	Williamsia
Otu0391	50	180	2.99312	0.000276754	0.00363734	Firmicutes	Sporomusaceae	Sporomusaceae_unclassified
Otu0800	16	100	2.97751	4.34173e-05	0.00133146	Proteobacteria	Rhodospirillales_unclassified	Rhodospirillales_unclassified
Otu0631	29	300	2.96748	0.000505306	0.00516535	Firmicutes	Ruminococcaceae	Ruminococcus
Otu0309	80	352	2.95309	0.000447357	0.00489962	Dependentiae	UBA12409	UBA12409_ge
Otu0417	73	251	2.87125	0.000681457	0.00626941	Proteobacteria	Unknown_Family	Acidibacter
Otu0502	6	58	2.86907	2.47948e-05	0.000814686	Proteobacteria	Magnetospirillaceae	Magnetospirillum
Otu0175	743	1042	2.76465	0.00432072	0.0244427	Firmicutes	Enterococcaceae	Enterococcaceae_unclassified
Otu0247	136	166	2.70681	0.00581296	0.0307352	Firmicutes	Bacillaceae	Aeribacillus
Otu0275	264	386	2.68153	0.00054887	0.00537192	Bacteroidota	Sphingobacteriales_unclassified	Sphingobacteriales_unclassified
Otu0335	233	386	2.67871	0.000815545	0.00671192	Proteobacteria	Hyphomonadaceae	SWB02
Otu0195	312	811	2.67446	0.000835244	0.00671192	Proteobacteria	Methylophilaceae	Methylophilaceae_unclassified
Otu0276	1135	2111	2.57203	0.00952899	0.0456597	Firmicutes	Christensenellaceae	Christensenellaceae_R-7_group
Otu0381	113	221	2.51745	0.0081331	0.0406655	Firmicutes	Paenibacillaceae	Paenibacillaceae_unclassified
Otu0090	475	559	2.51562	0.000536487	0.00536487	Proteobacteria	Rhodocyclaceae	Rhodocyclaceae_unclassified
Otu0265	366	706	2.48054	9.17691e-05	0.0016966	Actinobacteriota	Brevibacteriaceae	Brevibacterium
Otu0617	205	308	2.46686	0.000954257	0.00743997	Bacteroidota	Tannerellaceae	Parabacteroides
Otu0214	144	332	2.45962	0.00181887	0.0119525	Bacteroidota	AKYH767	AKYH767_ge
Otu0357	244	692	2.45864	0.00698412	0.0356966	Proteobacteria	Moraxellaceae	Alkanindiges
Otu0334	485	863	2.45822	0.000805064	0.00671192	Firmicutes	Lachnospiraceae	Fusicatenibacter
Otu0224	226	345	2.43614	0.000483443	0.005146	Actinobacteriota	Sporichthyaceae	Sporichthyaceae_unclassified
Otu0461	488	458	2.41586	0.00359753	0.0209477	Actinobacteriota	Dermacoccaceae	Dermacoccus
Otu0321	99	200	2.41451	0.00158807	0.0112443	Actinobacteriota	Pseudonocardiaceae	Pseudonocardia
Otu0189	108	163	2.2768	0.00750542	0.0379395	Proteobacteria	Rhizobiaceae	Allorhizobium-Neorhizobium-Pararhizobium-Rhizobium
Otu0264	340	1729	2.21882	0.0103953	0.0487945	Firmicutes	Planococcaceae	Planococcaceae_unclassified
Otu0538	73	79	2.20098	0.00313964	0.0192565	Campilobacterota	Arcobacteraceae	Pseudarcobacter
Otu0450	52	145	2.17056	0.00588296	0.0307518	Proteobacteria	Xanthomonadales_unclassified	Xanthomonadales_unclassified
Otu0281	176	213	2.10336	0.00322507	0.0195201	Patescibacteria	Saccharimonadaceae	TM7a
Otu0159	476	473	2.08664	0.0021352	0.0136416	Bacteroidota	Weeksellaceae	Chryseobacterium
Otu0219	98	356	2.05464	0.00435718	0.0244427	Dependentiae	Babeliales_unclassified	Babeliales_unclassified
Otu0478	56	70	2.03713	0.01009	0.0478493	Actinobacteriota	Ilumatobacteraceae	CL500-29_marine_group
Otu0194	403	658	2.00102	0.00177865	0.0118577	Bacteroidota	Paludibacteraceae	Paludibacter
Otu0126	304	388	1.97856	0.00158887	0.0112443	Proteobacteria	Pseudomonadaceae	Pseudomonadaceae_unclassified
Otu0277	43	94	1.93358	0.0037069	0.0213147	Actinobacteriota	Dermabacteraceae	Dermabacteraceae_unclassified
Otu0342	63	157	1.83641	0.00931177	0.0455682	Proteobacteria	Sphingomonadaceae	Sphingorhabdus
Otu0839	35	9	-1.46747	0.00946161	0.0456597	Patescibacteria	ABY1_unclassified	ABY1_unclassified
Otu0802	113	10	-1.60164	0.00690907	0.0356966	Firmicutes	Oscillospiraceae	uncultured
Otu0306	54	11	-1.64108	0.000585181	0.00560798	Spirochaetota	Spirochaetaceae	Spirochaetaceae_unclassified
Otu0549	33	3	-1.68717	0.000708223	0.00637646	Proteobacteria	Nitrosomonadaceae	Nitrosomonadaceae_unclassified
Otu0466	216	108	-1.71045	0.00503392	0.0275667	Cyanobacteria	Phormidiaceae	Tychonema_CCAP_1459-11B
Otu0474	29	6	-1.72383	0.00157351	0.0112443	Acidobacteriota	Vicinamibacteraceae	Vicinamibacteraceae_unclassified
Otu1011	131	23	-1.73837	0.000982029	0.00752889	Bacteroidota	Porphyromonadaceae	Porphyromonadaceae_unclassified
Otu0365	62	25	-1.73844	0.00542321	0.0290079	Firmicutes	Leuconostocaceae	Weissella
Otu0363	46	2	-1.88625	0.000214507	0.00300238	Proteobacteria	Xanthobacteraceae	Bradyrhizobium
Otu0470	112	17	-1.95467	0.00344922	0.0206057	Patescibacteria	Candidatus_Falkowbacteria_fa	Candidatus_Falkowbacteria_ge
Otu0428	129	6	-1.95597	0.0017602	0.0118577	Acidobacteriota	Vicinamibacterales_unclassified	Vicinamibacterales_unclassified
Otu0491	49	2	-1.97285	0.000117209	0.0019969	Myxococcota	Myxococcaceae	P3OB-42
Otu0392	118	13	-1.98632	0.002131	0.0136416	Bacteroidota	Crocinitomicaceae	Crocinitomicaceae_unclassified
Otu0607	136	56	-2.06729	0.00171256	0.0118164	Firmicutes	Butyricicoccaceae	Butyricicoccus
Otu0312	42	7	-2.12195	0.000295367	0.00367213	Firmicutes	Lachnospiraceae	Lachnoanaerobaculum
Otu0201	277	43	-2.16884	0.0045529	0.0252329	Bacteroidota	Flavobacteriaceae	Capnocytophaga
Otu0093	971	201	-2.20125	0.00082104	0.00671192	Proteobacteria	Pasteurellaceae	Haemophilus
Otu0379	308	43	-2.21696	0.00259573	0.0163567	Proteobacteria	Burkholderiaceae	Burkholderia-Caballeronia-Paraburkholderia
Otu0933	72	4	-2.29929	0.00029298	0.00367213	Fusobacteriota	Fusobacteriaceae	Fusobacteriaceae_unclassified
Otu0285	99	9	-2.32615	0.000492226	0.005146	Proteobacteria	Comamonadaceae	Inhella
Otu0216	153	13	-2.35122	0.000720817	0.00637646	Proteobacteria	Comamonadaceae	Giesbergeria
Otu0382	150	11	-2.3613	0.000846286	0.00671192	Patescibacteria	Saccharimonadaceae	Saccharimonadaceae_ge
Otu0338	186	23	-2.44985	0.00172109	0.0118164	Actinobacteriota	Geodermatophilaceae	Geodermatophilaceae_unclassified
Otu0854	124	18	-2.51079	0.000378339	0.00446246	Bacteroidota	Muribaculaceae	Muribaculaceae_unclassified
Otu0818	79	3	-2.56185	8.64611e-05	0.0016966	Verrucomicrobiota	Omnitrophales_fa	Omnitrophales_ge
Otu0196	2266	223	-2.59694	0.00148638	0.0112088	Actinobacteriota	Actinomycetaceae	Mobiluncus
Otu0289	226	98	-2.64045	0.00279426	0.0173697	Proteobacteria	Azospirillaceae	Azospirillaceae_unclassified
Otu0445	95	6	-2.69452	7.67895e-05	0.0016966	Firmicutes	Peptostreptococcaceae	Romboutsia
Otu0518	157	11	-2.72163	9.36633e-05	0.0016966	Actinobacteriota	Gaiellales_unclassified	Gaiellales_unclassified
Otu0905	195	13	-2.78371	0.000128352	0.00210864	Firmicutes	Lachnospiraceae	CAG-56
Otu0559	283	121	-2.80041	0.0015423	0.0112443	Firmicutes	Carnobacteriaceae	Trichococcus
Otu0505	202	1	-2.84254	0.000199917	0.00296652	Actinobacteriota	Nocardiaceae	Gordonia
Otu0317	111	7	-2.84483	6.79001e-05	0.0016439	Proteobacteria	Rhodocyclaceae	Methyloversatilis
Otu0820	150	17	-2.94638	9.58946e-05	0.0016966	Firmicutes	Aerococcaceae	Eremococcus
Otu0356	166	0	-2.97568	2.24181e-05	0.000799437	Proteobacteria	Moraxellaceae	Perlucidibaca
Otu0449	670	42	-3.0364	0.000813854	0.00671192	Firmicutes	Erysipelatoclostridiaceae	Catenibacterium
Otu0161	878	48	-3.13841	0.000441192	0.00489962	Bacteroidota	Prevotellaceae	Alloprevotella
Otu0143	411	37	-3.1645	6.10794e-06	0.000468275	Proteobacteria	Sphingomonadaceae	Sphingobium
Otu0426	618	5	-3.24299	0.00033751	0.00408565	Actinobacteriota	Atopobiaceae	Olsenella
Otu0022	157654	35939	-3.26743	0.00888648	0.0439546	Campilobacterota	Campylobacteraceae	Campylobacter
Otu0122	157	1	-3.68956	9.44069e-08	2.85403e-05	Firmicutes	Bacillaceae	Anoxybacillus
Otu0530	517	61	-3.77904	5.13975e-05	0.00139075	Actinobacteriota	Coriobacteriales_Incertae_Sedis	uncultured
Otu0124	12362	2133	-4.44494	0.00525996	0.0284656	Firmicutes	Peptostreptococcaceae	Peptostreptococcus
Otu0255	2687	25	-4.55027	1.23502e-05	0.000679409	Proteobacteria	Sutterellaceae	Sutterella
Otu0389	772	34	-4.7809	1.9863e-06	0.000304567	Firmicutes	Erysipelotrichaceae	Solobacterium

## Sheet: legend
Legend
OTU	Operational taxonomic unit
adjPvalues	Adjusted p value
bolded	Bacteria overrepresented in female group
