# Supplementary material for: Microbiome Sex-Related Diversity in Non-Muscle-Invasive Urothelial Bladder Cancer
Source: Curr Issues Mol Biol. 2024 Apr 19;46(4):3595–609. doi: 10.3390/cimb46040225 (PMC11048804; doi:10.3390/cimb46040225)
Supplement: Supplementary file 1 [file cimb-46-00225-s001.zip › Supplementary Table S2.xlsx]

## Sheet: bladder mucosa
Supplementary Table 2: High-grade tumors sex-related differences in bladder mucosa
						Taxonomic level
OTU	counts in male group	counts in female group	fold change	pvalues	adjPvalues	Phylum	Family	Genus
Otu0092	132	2055	3.99389	0.000564686	0.0278091	Proteobacteria	Enterobacteriaceae	Salmonella
Otu0445	120	235	3.40972	0.00137516	0.0492784	Firmicutes	Peptostreptococcaceae	Romboutsia
Otu0566	23	207	3.22437	0.000438142	0.0278091	Myxococcota	Nannocystaceae	Nannocystaceae_unclassified
Otu0338	100	443	2.82039	0.000583094	0.0278091	Actinobacteriota	Geodermatophilaceae	Geodermatophilaceae_unclassified
Otu0469	227	509	2.46409	0.00129725	0.0492784	Verrucomicrobiota	Omnitrophaceae	Candidatus_Omnitrophus
Otu0488	56	144	2.09079	0.00158963	0.0492784	Firmicutes	Clostridiales_unclassified	Clostridiales_unclassified
Otu0444	345	14	-2.82691	0.000496603	0.0278091	Patescibacteria	JGI_0000069-P22_fa	JGI_0000069-P22_ge
Otu0904	103	7	-2.83958	0.00155719	0.0492784	Actinobacteriota	Microbacteriaceae	Galbitalea
Otu0601	100	3	-2.86133	0.000567181	0.0278091	Actinobacteriota	uncultured	uncultured_ge
Otu0147	813	56	-2.97215	0.00153909	0.0492784	Firmicutes	Peptostreptococcales-Tissierellales_fa	Parvimonas
Otu0610	207	25	-3.28374	0.000838197	0.0346455	Firmicutes	Clostridiaceae	Clostridium_sensu_stricto_10
Otu0463	325	4	-3.50665	0.000474894	0.0278091	Actinobacteriota	Nocardioidaceae	Aeromicrobium
Otu0590	193	8	-3.83186	7.54315e-05	0.0093535	Cyanobacteria	Phormidiaceae	Phormidiaceae_unclassified
Otu0420	240	4	-3.98391	1.86063e-05	0.00288398	Proteobacteria	Oxalobacteraceae	Collimonas
Otu0196	799	0	-4.60221	0.000639509	0.0283211	Actinobacteriota	Actinomycetaceae	Mobiluncus
Otu0069	949	4	-4.88218	1.69999e-05	0.00288398	Firmicutes	Peptococcaceae	Peptococcus
Otu0270	886	0	-5.15092	0.000176138	0.0182009	Actinobacteriota	Dietziaceae	Dietzia
Otu0483	793	9	-5.19231	2.14476e-06	0.000664875	Cyanobacteria	Cyanobiaceae	Cyanobiaceae_unclassified
Otu0091	1955	0	-5.19542	0.000433692	0.0278091	Firmicutes	Veillonellaceae	Negativicoccus
Otu0084	1936	2	-6.20935	3.28322e-07	0.00020356	Firmicutes	Peptostreptococcales-Tissierellales_fa	Murdochiella

## Sheet: tumor tissues
Supplementary Table 2: High-grade tumors sex-related differences in tumor tissues
						Taxonomic level
OTU	counts in male group	counts in female group	fold change	pvalues	adjPvalues	Phylum	Family	Genus
Otu0092	730	12754	3.84001	0.00913615	0.0367587	Proteobacteria	Enterobacteriaceae	Salmonella
Otu0323	194	456	2.95902	0.0107193	0.041507	Firmicutes	Lachnospiraceae	Oribacterium
Otu0605	10	644	2.74653	0.00891763	0.0367587	Proteobacteria	Enterobacteriaceae	Enterobacter
Otu0734	18	58	2.53603	0.0101125	0.0400612	Proteobacteria	Unknown_Family	Unknown_Family_ge
Otu0342	265	41	-1.91154	0.00934435	0.037305	Proteobacteria	Sphingomonadaceae	Sphingorhabdus
Otu1013	44	0	-2.02703	0.0101933	0.0400728	Vertebrata	Vertebrata_unclassified	Vertebrata_unclassified
Otu0454	198	13	-2.13258	0.00425782	0.0243642	Chloroflexi	SBR1031_unclassified	SBR1031_unclassified
Otu0118	1702	250	-2.15357	0.00719769	0.0331523	Proteobacteria	Xanthomonadaceae	Xanthomonas
Otu0226	569	51	-2.15407	0.00847283	0.0356801	Myxococcota	Haliangiaceae	Haliangium
Otu0039	21531	5501	-2.17865	0.0121752	0.0435434	Actinobacteriota	Actinomycetaceae	Actinomyces
Otu0126	2679	260	-2.19282	0.00849173	0.0356801	Proteobacteria	Pseudomonadaceae	Pseudomonadaceae_unclassified
Otu0392	396	13	-2.23468	0.0107093	0.041507	Bacteroidota	Crocinitomicaceae	Crocinitomicaceae_unclassified
Otu0911	56	1	-2.24968	0.0134384	0.0467621	Actinobacteriota	Intrasporangiaceae	Aquipuribacter
Otu0319	220	23	-2.26031	0.0126207	0.0448253	Bacteroidota	Weeksellaceae	Chishuiella
Otu0275	397	36	-2.26448	0.00177652	0.0151443	Bacteroidota	Sphingobacteriales_unclassified	Sphingobacteriales_unclassified
Otu0506	148	37	-2.29989	0.0136585	0.047209	Actinobacteriota	IMCC26256_fa	IMCC26256_ge
Otu0104	2856	250	-2.30287	0.00725856	0.0331523	Proteobacteria	Cellvibrionaceae	Cellvibrio
Otu0518	119	12	-2.30548	0.0108237	0.0415985	Actinobacteriota	Gaiellales_unclassified	Gaiellales_unclassified
Otu0086	577	30	-2.30641	0.0148425	0.0499601	Firmicutes	Listeriaceae	Brochothrix
Otu0215	923	46	-2.30972	0.00645527	0.0317758	Actinobacteriota	Nocardioidaceae	Nocardioidaceae_unclassified
Otu0474	162	3	-2.30996	0.00189608	0.0152575	Acidobacteriota	Vicinamibacteraceae	Vicinamibacteraceae_unclassified
Otu0455	266	26	-2.33411	0.00291305	0.0200029	Actinobacteriota	Microbacteriaceae	Leucobacter
Otu0362	597	29	-2.35968	0.0120422	0.0435434	Acidobacteriota	Acidobacteriae_unclassified	Acidobacteriae_unclassified
Otu0067	4392	333	-2.36112	0.00242841	0.0176145	Bacteroidota	Bacteroidia_unclassified	Bacteroidia_unclassified
Otu0502	162	20	-2.36387	0.0117152	0.0434968	Proteobacteria	Magnetospirillaceae	Magnetospirillum
Otu0096	3685	608	-2.39119	0.0138946	0.0477047	Proteobacteria	Comamonadaceae	Paucibacter
Otu0077	4932	441	-2.39376	0.0140778	0.0480136	Proteobacteria	Oxalobacteraceae	Massilia
Otu0403	390	32	-2.39926	0.00713358	0.0331523	Actinobacteriota	Tsukamurellaceae	Tsukamurella
Otu0169	906	164	-2.41962	0.0031082	0.0205221	Fusobacteriota	Leptotrichiaceae	Leptotrichia
Otu0311	479	56	-2.42279	0.0110946	0.0423237	Firmicutes	Anaerovoracaceae	Anaerovoracaceae_unclassified
Otu0297	90	2	-2.4247	0.00553478	0.0290858	Firmicutes	Erysipelotrichales_unclassified	Erysipelotrichales_unclassified
Otu0230	1001	181	-2.42598	0.00852166	0.0356801	Firmicutes	Selenomonadaceae	Selenomonadaceae_unclassified
Otu0265	828	94	-2.43036	0.0121434	0.0435434	Actinobacteriota	Brevibacteriaceae	Brevibacterium
Otu0252	855	93	-2.43115	0.00748395	0.0331523	Proteobacteria	A0839	A0839_ge
Otu0672	145	13	-2.43463	0.00527704	0.0284154	Bacteroidota	Cytophagales_unclassified	Cytophagales_unclassified
Otu0089	3972	416	-2.44883	0.00404369	0.0236648	Patescibacteria	Saccharimonadales_unclassified	Saccharimonadales_unclassified
Otu0408	475	28	-2.45222	0.00905678	0.0367587	Actinobacteriota	Mycobacteriaceae	Mycobacterium
Otu0554	120	4	-2.47328	0.0084599	0.0356801	Patescibacteria	Gracilibacteria_unclassified	Gracilibacteria_unclassified
Otu0249	294	6	-2.49815	0.00663251	0.032224	Bacteroidota	Bacteroidota_unclassified	Bacteroidota_unclassified
Otu0250	1086	96	-2.51259	0.00647856	0.0317758	Actinobacteriota	Ilumatobacteraceae	Ilumatobacteraceae_unclassified
Otu0094	4914	538	-2.51292	0.0130773	0.0458151	Bdellovibrionota	0319-6G20_fa	0319-6G20_ge
Otu0142	1555	122	-2.52293	0.00391166	0.0233512	Spirochaetota	Leptospiraceae	Turneriella
Otu0072	7434	717	-2.52418	0.00692157	0.0330056	Actinobacteriota	Microbacteriaceae	Rhodoluna
Otu0217	691	48	-2.52497	0.000715424	0.0108366	Proteobacteria	Comamonadaceae	Acidovorax
Otu0155	1992	106	-2.56365	0.0120096	0.0435434	Proteobacteria	Caulobacteraceae	Caulobacteraceae_unclassified
Otu0706	63	1	-2.5754	0.0014732	0.0146549	Cyanobacteria	Obscuribacteraceae	Candidatus_Obscuribacter
Otu0443	298	8	-2.59207	0.0117867	0.0434968	Actinobacteriota	Microtrichaceae	Microtrichaceae_unclassified
Otu0082	5294	1147	-2.59606	0.00455533	0.0252258	Actinobacteriota	Micrococcaceae	Micrococcaceae_unclassified
Otu0358	330	13	-2.64215	0.00250518	0.017919	Proteobacteria	Hyphomonadaceae	Hirschia
Otu0049	7052	459	-2.67402	0.00529686	0.0284154	Firmicutes	Peptostreptococcales-Tissierellales_fa	Finegoldia
Otu0061	18058	1002	-2.68373	0.00678187	0.0326417	Proteobacteria	Alphaproteobacteria_unclassified	Alphaproteobacteria_unclassified
Otu0018	39756	6776	-2.70027	0.00219665	0.0174042	Firmicutes	Veillonellaceae	Veillonella
Otu0056	17399	1330	-2.70085	0.00567821	0.0295382	Firmicutes	Bacillaceae	Bacillus
Otu0024	34789	5197	-2.71751	0.00174066	0.0151443	Actinobacteriota	Actinobacteria_unclassified	Actinobacteria_unclassified
Otu0070	16713	1676	-2.71759	0.00908592	0.0367587	Bacteroidota	Weeksellaceae	Weeksellaceae_unclassified
Otu0017	43586	8118	-2.71875	0.00743938	0.0331523	Actinobacteriota	Propionibacteriaceae	Cutibacterium
Otu0576	98	0	-2.71897	0.0111948	0.0423922	Proteobacteria	Devosiaceae	Devosiaceae_unclassified
Otu0133	3336	153	-2.73779	0.00479378	0.0262638	Proteobacteria	Caulobacteraceae	Brevundimonas
Otu0210	276	9	-2.74229	0.00624749	0.0317758	Firmicutes	Staphylococcaceae	Nosocomiicoccus
Otu0225	1096	78	-2.74999	0.00054989	0.0101582	Proteobacteria	Rhodocyclaceae	C39
Otu0102	7552	424	-2.75223	0.00753169	0.0331523	Proteobacteria	Sphingomonadaceae	Sphingomonas
Otu0238	183	1	-2.79519	0.0118244	0.0434968	Firmicutes	Erysipelotrichaceae	Erysipelotrichaceae_unclassified
Otu0305	769	9	-2.80353	0.00713444	0.0331523	Bdellovibrionota	Silvanigrellaceae	Silvanigrella
Otu0132	2556	341	-2.82562	0.00230536	0.0174424	Actinobacteriota	Corynebacteriales_unclassified	Corynebacteriales_unclassified
Otu0479	319	13	-2.83508	0.00894026	0.0367587	Proteobacteria	Xanthomonadaceae	Arenimonas
Otu0098	2569	352	-2.88504	0.00365771	0.0226954	Patescibacteria	Saccharimonadales_fa	Saccharimonadales_ge
Otu0790	158	1	-2.8932	0.00646312	0.0317758	Proteobacteria	Beijerinckiaceae	Microvirga
Otu0320	692	35	-2.89414	0.00360576	0.0226459	Bdellovibrionota	Silvanigrellaceae	Silvanigrellaceae_unclassified
Otu0005	180379	29039	-2.89696	0.00449449	0.0251594	Firmicutes	Staphylococcaceae	Staphylococcus
Otu0080	8960	912	-2.90729	0.00316022	0.0206015	Bacteroidota	Weeksellaceae	Cloacibacterium
Otu0191	1134	55	-2.92325	0.000480172	0.0101582	Bacteroidota	Crocinitomicaceae	Fluviicola
Otu0026	752	17	-2.93517	0.00586907	0.0302257	Proteobacteria	Morganellaceae	Proteus
Otu0229	709	22	-2.95883	0.00327833	0.0208437	Actinobacteriota	Iamiaceae	Iamia
Otu0100	2787	438	-2.96027	0.00394476	0.0233512	Bdellovibrionota	Bdellovibrionaceae	Bdellovibrio
Otu0409	431	6	-2.9767	0.00814263	0.0352391	Proteobacteria	Sphingomonadaceae	Rhizorhapis
Otu0053	15575	2371	-2.97702	0.0117672	0.0434968	Proteobacteria	Comamonadaceae	Pelomonas
Otu0073	7409	685	-2.9841	0.00259492	0.0183066	Proteobacteria	Comamonadaceae	Limnohabitans
Otu0179	902	49	-3.00029	0.000557709	0.0101582	Deinococcota	Deinococcaceae	Deinococcus
Otu0227	1243	103	-3.00773	0.00233695	0.0174424	Proteobacteria	Hydrogenophilaceae	Hydrogenophilus
Otu0292	925	39	-3.01049	0.00321145	0.0206737	Proteobacteria	Hyphomonadaceae	Hyphomonadaceae_unclassified
Otu0469	158	12	-3.01505	0.000897058	0.0115496	Verrucomicrobiota	Omnitrophaceae	Candidatus_Omnitrophus
Otu0620	161	6	-3.02366	0.00155219	0.0146549	Bacteroidota	Microscillaceae	Microscillaceae_unclassified
Otu0048	91317	556	-3.05373	0.0130348	0.0458151	Proteobacteria	Rhizobiales_unclassified	Rhizobiales_unclassified
Otu0060	1305	149	-3.09861	0.00381652	0.0231236	Firmicutes	Peptostreptococcales-Tissierellales_fa	Ezakiella
Otu0421	518	11	-3.1061	0.00379208	0.0231236	Firmicutes	Sporomusaceae	Pelosinus
Otu0071	9905	1866	-3.11197	0.0027483	0.0191267	Actinobacteriota	Corynebacteriaceae	Corynebacteriaceae_unclassified
Otu0171	1856	133	-3.11239	0.0147313	0.0499121	Firmicutes	Peptostreptococcaceae	Peptostreptococcaceae_unclassified
Otu0052	13864	2890	-3.12775	0.0014145	0.0146549	Actinobacteriota	Micrococcales_unclassified	Micrococcales_unclassified
Otu0380	553	53	-3.12993	0.00553313	0.0290858	Chloroflexi	Roseiflexaceae	uncultured
Otu0036	22849	2788	-3.13015	0.00182912	0.0151443	Cyanobacteria	Cyanobacteriia_unclassified	Cyanobacteriia_unclassified
Otu0519	355	28	-3.13772	0.00307287	0.0205221	Bacteroidota	Williamwhitmaniaceae	Acetobacteroides
Otu0044	21393	2360	-3.14702	0.00122764	0.0134518	Proteobacteria	Oxalobacteraceae	Oxalobacteraceae_unclassified
Otu0597	174	0	-3.15475	0.00747671	0.0331523	Deinococcota	Trueperaceae	Truepera
Otu0015	52439	6362	-3.17499	0.00165046	0.0146549	Bacteroidota	Flavobacteriaceae	Flavobacterium
Otu0492	199	0	-3.17824	0.00774449	0.0338001	Actinobacteriota	Micrococcaceae	Paenarthrobacter
Otu0162	1506	95	-3.19369	0.000572012	0.0101582	Actinobacteriota	Microtrichaceae	IMCC26207
Otu0028	26336	3103	-3.20716	0.00156163	0.0146549	Proteobacteria	Alteromonadales_unclassified	Alteromonadales_unclassified
Otu0007	125757	12950	-3.2104	0.00155333	0.0146549	Bacteroidota	Flavobacteriaceae	Flavobacteriaceae_unclassified
Otu0020	38200	7822	-3.23677	0.000801471	0.0110565	Actinobacteriota	Corynebacteriaceae	Corynebacterium
Otu0012	79876	9273	-3.25528	0.00149319	0.0146549	Proteobacteria	Comamonadaceae	Comamonadaceae_unclassified
Otu0034	27220	3505	-3.25593	0.00113499	0.0132845	Proteobacteria	Moraxellaceae	Moraxellaceae_unclassified
Otu0110	4198	337	-3.25645	0.00149937	0.0146549	Proteobacteria	Beijerinckiaceae	Beijerinckiaceae_unclassified
Otu0013	62806	7900	-3.27694	0.00120137	0.0134502	Proteobacteria	Alteromonadaceae	Rheinheimera
Otu0021	50141	5847	-3.3025	0.00081582	0.0110565	Proteobacteria	Moraxellaceae	Acinetobacter
Otu0037	28642	4878	-3.30366	0.0018526	0.0151443	Proteobacteria	Moraxellaceae	Moraxella
Otu0038	31017	6317	-3.30531	0.00241047	0.0176145	Proteobacteria	Moraxellaceae	Psychrobacter
Otu0861	167	0	-3.30645	0.00425015	0.0243642	Proteobacteria	Sphingomonadaceae	Stakelama
Otu0027	48135	4247	-3.31058	0.00116538	0.0133371	Proteobacteria	Pseudomonadaceae	Pseudomonas
Otu0271	1039	27	-3.32311	0.00049994	0.0101582	Proteobacteria	Methylophilaceae	Methylophilus
Otu0186	1035	41	-3.32525	0.00160925	0.0146549	Proteobacteria	Chromobacteriaceae	Chromobacteriaceae_unclassified
Otu0033	31910	4360	-3.35299	0.00226479	0.0174085	Actinobacteriota	Microbacteriaceae	Microbacteriaceae_unclassified
Otu0164	809	92	-3.35996	0.00448544	0.0251594	Firmicutes	Aerococcaceae	Aerococcus
Otu0410	490	49	-3.3701	0.000677073	0.0108366	Actinobacteriota	Pseudonocardiaceae	Actinomycetospora
Otu0264	350	7	-3.40566	0.00184686	0.0151443	Firmicutes	Planococcaceae	Planococcaceae_unclassified
Otu0377	223	42	-3.40728	0.000988155	0.0121602	Campilobacterota	Arcobacteraceae	Arcobacteraceae_unclassified
Otu0135	755	2	-3.42278	0.00645372	0.0317758	Bacteroidota	Flavobacteriaceae	Myroides
Otu0347	614	23	-3.43941	0.00308848	0.0205221	Proteobacteria	TRA3-20	TRA3-20_ge
Otu0423	196	2	-3.47493	0.00030426	0.00870521	Proteobacteria	Sphingomonadaceae	Polymorphobacter
Otu0153	1910	92	-3.49858	0.000272294	0.00824889	Proteobacteria	Xanthobacteraceae	Xanthobacteraceae_unclassified
Otu0630	190	6	-3.49875	0.000184237	0.00677729	Proteobacteria	Yersiniaceae	Yersiniaceae_unclassified
Otu0025	32030	4884	-3.50238	0.000699809	0.0108366	Actinobacteriota	Micrococcaceae	Rothia
Otu0370	368	3	-3.50481	0.00156656	0.0146549	Myxococcota	Nannocystaceae	Nannocystis
Otu0274	508	29	-3.50945	0.000421949	0.009448	Proteobacteria	SM2D12	SM2D12_ge
Otu0198	1104	47	-3.51124	1.33531e-05	0.0015905	Acidobacteriota	Vicinamibacteraceae	Vicinamibacteraceae_ge
Otu0223	1403	98	-3.5173	0.00016905	0.00669697	Myxococcota	mle1-27_fa	mle1-27_ge
Otu0029	25894	2691	-3.5211	0.000421507	0.009448	Proteobacteria	Burkholderiales_unclassified	Burkholderiales_unclassified
Otu0349	288	2	-3.53082	0.000786192	0.0110565	Bacteroidota	Prolixibacteraceae	WCHB1-32
Otu0335	363	14	-3.5821	0.000538589	0.0101582	Proteobacteria	Hyphomonadaceae	SWB02
Otu0167	955	5	-3.58992	0.00747101	0.0331523	Firmicutes	Ruminococcaceae	Faecalibacterium
Otu0436	545	1	-3.60462	0.00164665	0.0146549	Actinobacteriota	Solirubrobacteraceae	Solirubrobacteraceae_unclassified
Otu0287	962	106	-3.6465	0.00074159	0.010912	Firmicutes	Selenomonadaceae	Selenomonas
Otu0491	247	4	-3.69387	0.000238354	0.007672	Myxococcota	Myxococcaceae	P3OB-42
Otu0016	33544	5433	-3.70245	0.000682857	0.0108366	Firmicutes	Streptococcaceae	Lactococcus
Otu0030	43549	3407	-3.70777	0.000675594	0.0108366	Proteobacteria	Sphingomonadaceae	Sphingomonadaceae_unclassified
Otu0573	292	5	-3.74151	0.000198664	0.00682079	MBNT15	MBNT15_fa	MBNT15_ge
Otu0427	215	0	-3.80633	0.00110929	0.0132845	Bdellovibrionota	Bacteriovoracaceae	Bacteriovorax
Otu0295	480	1	-3.83678	0.000402146	0.009448	Proteobacteria	Sphingomonadaceae	Porphyrobacter
Otu0124	589	43	-3.90429	0.000343427	0.00930869	Firmicutes	Peptostreptococcaceae	Peptostreptococcus
Otu0176	895	15	-4.02623	1.07029e-05	0.0015905	Firmicutes	Hungateiclostridiaceae	Hungateiclostridiaceae_unclassified
Otu0315	548	1	-4.07458	0.000417568	0.009448	Proteobacteria	Halieaceae	OM60	100)
Otu0433	231	7	-4.11032	3.62262e-05	0.00207294	Proteobacteria	Caulobacteraceae	Asticcacaulis
Otu0516	298	15	-4.11727	7.58521e-05	0.00363493	Proteobacteria	Burkholderiaceae	Pandoraea
Otu0463	233	3	-4.14328	1.85301e-05	0.0015905	Actinobacteriota	Nocardioidaceae	Aeromicrobium
Otu0196	494	0	-4.14542	0.00223085	0.0174074	Actinobacteriota	Actinomycetaceae	Mobiluncus
Otu0432	314	0	-4.161	0.000887924	0.0115496	Proteobacteria	Devosiaceae	Devosia
Otu0448	369	2	-4.26438	2.96117e-05	0.00190625	Actinobacteriota	Dermabacteraceae	Brachybacterium
Otu0444	569	9	-4.30087	8.46974e-05	0.00363493	Patescibacteria	JGI_0000069-P22_fa	JGI_0000069-P22_ge
Otu0088	4073	210	-4.34307	4.11471e-07	0.000211908	Proteobacteria	Mitochondria	Mitochondria_ge
Otu0332	501	2	-4.39261	2.57861e-05	0.00189712	Proteobacteria	Hyphomicrobiaceae	Hyphomicrobiaceae_unclassified
Otu0058	3972	54	-4.39587	8.1524e-05	0.00363493	Proteobacteria	Alcaligenaceae	Alcaligenes
Otu0256	604	0	-4.46539	0.000991703	0.0121602	Proteobacteria	Rhizobiales_Incertae_Sedis	uncultured
Otu0247	1153	12	-5.0287	1.68203e-05	0.0015905	Firmicutes	Bacillaceae	Aeribacillus
Otu0069	1607	16	-5.19953	2.69917e-06	0.000695036	Firmicutes	Peptococcaceae	Peptococcus

## Sheet: urine samples
Supplementary Table 2: High-grade tumors sex-related differences in urine samples
						Taxonomic level
OTU	counts in male group	counts in female group	fold change	pvalues	adjPvalues	Phylum	Family	Genus
Otu0055	23998	786	-4.58212	0.000258351	0.026378	Firmicutes	Lachnospiraceae	Lachnospiraceae_unclassified
Otu0400	469	6	-4.08019	0.000317807	0.026378	Firmicutes	Selenomonadaceae	Megamonas
Otu0311	451	7	-3.80385	0.000120963	0.026378	Firmicutes	Anaerovoracaceae	Anaerovoracaceae_unclassified
Otu0394	456	0	-4.92806	0.000680586	0.0338932	Firmicutes	Lachnospiraceae	Lachnospira
Otu0202	174	1	-3.36583	0.000604875	0.0338932	Chloroflexi	Anaerolineae_unclassified	Anaerolineae_unclassified
Otu0118	1625	1	-4.68721	0.00112252	0.0413184	Proteobacteria	Xanthomonadaceae	Xanthomonas
Otu0607	79	2	-2.91909	0.00116156	0.0413184	Firmicutes	Butyricicoccaceae	Butyricicoccus
Otu0167	2528	68	-4.07228	0.00138382	0.0430714	Firmicutes	Ruminococcaceae	Faecalibacterium
Otu0146	1522	23	-4.19436	0.00174036	0.04815	Actinobacteriota	Actinomycetaceae	Varibaculum

## Sheet: legend
Legend
OTU	Operational taxonomic unit
adjPvalues	Adjusted p value
bolded	Bacteria overrepresented in high-grade female tissues
