# Supplementary material for: Microbiome Sex-Related Diversity in Non-Muscle-Invasive Urothelial Bladder Cancer
Source: Curr Issues Mol Biol. 2024 Apr 19;46(4):3595–609. doi: 10.3390/cimb46040225 (PMC11048804; doi:10.3390/cimb46040225)
Supplement: Supplementary file 1 [file cimb-46-00225-s001.zip › Supplementary Table S3.xlsx]

## Sheet: bladder mucosa
Supplementary Table 3: Low-grade tumors sex-related differences in bladder mucosa
						Taxonomic level
OTU	counts in male group	counts in female group	fold change	pvalues	adjPvalues	Phylum	Family	Genus
Otu0225	1106	33	-4.51632	0.000239815	0.0455648	Proteobacteria	Rhodocyclaceae	C39
Otu0354	717	12	-4.32432	0.000128251	0.0455648	Proteobacteria	Cellvibrionales_unclassified	Cellvibrionales_unclassified
Otu0106	408	42	-3.50497	0.000852088	0.0647587	Proteobacteria	Comamonadaceae	Delftia
Otu0152	2350	110	-3.68381	0.000804979	0.0647587	Firmicutes	Clostridiaceae	Clostridiaceae_unclassified
Otu0392	590	25	-3.48888	0.000786887	0.0647587	Bacteroidota	Crocinitomicaceae	Crocinitomicaceae_unclassified
Otu0635	154	3	-3.32739	0.00144816	0.0917165	Actinobacteriota	Microbacteriaceae	Candidatus_Aquiluna
Otu0067	6564	1460	-3.43232	0.00263382	0.100085	Bacteroidota	Bacteroidia_unclassified	Bacteroidia_unclassified
Otu0304	681	114	-3.40425	0.00239168	0.100085	Proteobacteria	Comamonadaceae	Ottowia
Otu0332	523	15	-3.6813	0.00243552	0.100085	Proteobacteria	Hyphomicrobiaceae	Hyphomicrobiaceae_unclassified
Otu0367	657	27	-3.91113	0.00195949	0.100085	Proteobacteria	Comamonadaceae	Rhizobacter
Otu0179	2105	196	-3.01548	0.00365364	0.126217	Deinococcota	Deinococcaceae	Deinococcus
Otu0307	862	89	-3.19534	0.00445277	0.141004	Bacteroidota	Sphingobacteriaceae	Sphingobacterium
Otu0028	47534	9042	-3.63003	0.00606975	0.170761	Proteobacteria	Alteromonadales_unclassified	Alteromonadales_unclassified
Otu0086	1539	248	-2.15694	0.00943679	0.170761	Firmicutes	Listeriaceae	Brochothrix
Otu0104	5472	1011	-3.2357	0.00816244	0.170761	Proteobacteria	Cellvibrionaceae	Cellvibrio
Otu0226	1196	112	-2.87605	0.00908272	0.170761	Myxococcota	Haliangiaceae	Haliangium
Otu0303	382	68	-2.93241	0.00901418	0.170761	Proteobacteria	Hyphomicrobiaceae	Hyphomicrobium
Otu0349	710	45	-3.1301	0.00922603	0.170761	Bacteroidota	Prolixibacteraceae	WCHB1-32
Otu0402	616	66	-2.97309	0.00677927	0.170761	Proteobacteria	Hyphomonadaceae	Hyphomonas
Otu0458	474	63	-3.04013	0.00909594	0.170761	Proteobacteria	CCM19a_fa	CCM19a_ge
Otu0464	536	101	-2.9344	0.00789414	0.170761	Proteobacteria	Rhodobacteraceae	Frigidibacter
Otu0036	30021	5781	-2.42333	0.0102977	0.176871	Cyanobacteria	Cyanobacteriia_unclassified	Cyanobacteriia_unclassified
Otu0112	3208	570	-2.08453	0.0116363	0.176871	Firmicutes	Bacillaceae	Bacillaceae_unclassified
Otu0133	2524	511	-2.37047	0.0109709	0.176871	Proteobacteria	Caulobacteraceae	Brevundimonas
Otu0326	176	727	2.55188	0.0113894	0.176871	Firmicutes	Lactobacillaceae	Lactobacillaceae_unclassified
Otu0092	144	504	2.91355	0.0158217	0.185081	Proteobacteria	Enterobacteriaceae	Salmonella
Otu0098	5202	614	-2.33781	0.0154547	0.185081	Patescibacteria	Saccharimonadales_fa	Saccharimonadales_ge
Otu0131	2406	224	-2.78357	0.0180197	0.185081	Proteobacteria	Rickettsiales_unclassified	Rickettsiales_unclassified
Otu0149	2614	454	-2.72056	0.0154639	0.185081	Proteobacteria	Rhodobacteraceae	Pseudorhodobacter
Otu0216	960	216	-2.40231	0.0185081	0.185081	Proteobacteria	Comamonadaceae	Giesbergeria
Otu0257	1362	174	-2.87727	0.0132357	0.185081	Bacteroidota	NS11-12_marine_group	NS11-12_marine_group_ge
Otu0285	856	194	-2.875	0.0162171	0.185081	Proteobacteria	Comamonadaceae	Inhella
Otu0358	638	95	-2.84414	0.0166626	0.185081	Proteobacteria	Hyphomonadaceae	Hirschia
Otu0396	192	18	-2.32652	0.0130225	0.185081	Bdellovibrionota	Bdellovibrionota_unclassified	Bdellovibrionota_unclassified
Otu0406	480	38	-2.62928	0.0179208	0.185081	Proteobacteria	Cellvibrionaceae	Cellvibrionaceae_unclassified
Otu0431	194	39	-2.48124	0.0180601	0.185081	Firmicutes	Lactobacillaceae	Pediococcus
Otu0524	232	32	-2.7866	0.0139498	0.185081	Planctomycetota	OM190_fa	OM190_ge
Otu0538	317	55	-2.73847	0.0161946	0.185081	Campilobacterota	Arcobacteraceae	Pseudarcobacter
Otu0007	200804	39222	-2.81323	0.019715	0.187293	Bacteroidota	Flavobacteriaceae	Flavobacteriaceae_unclassified
Otu0046	2006	603	-2.50329	0.0196698	0.187293	Firmicutes	Enterococcaceae	Enterococcus
Otu0125	4873	476	-2.46689	0.0215691	0.19061	Actinobacteriota	Bifidobacteriaceae	Gardnerella
Otu0128	1728	288	-1.9631	0.0211498	0.19061	Proteobacteria	Acetobacteraceae	Acetobacteraceae_unclassified
Otu0231	681	164	-2.42427	0.0206014	0.19061	Patescibacteria	Parcubacteria_unclassified	Parcubacteria_unclassified
Otu0518	289	12	-2.69034	0.0249285	0.215291	Actinobacteriota	Gaiellales_unclassified	Gaiellales_unclassified
Otu0031	23638	6551	-1.92831	0.0271809	0.21579	Bacteria_unclassified	Bacteria_unclassified	Bacteria_unclassified
Otu0051	39710	3905	-2.08822	0.0278255	0.21579	Proteobacteria	Rhodobacteraceae	Rhodobacteraceae_unclassified
Otu0214	1546	259	-2.48321	0.026371	0.21579	Bacteroidota	AKYH767	AKYH767_ge
Otu0662	163	13	-2.31658	0.0275249	0.21579	Verrucomicrobiota	Pedosphaeraceae	Pedosphaeraceae_unclassified
Otu0736	132	31	-2.46562	0.0256647	0.21579	Gemmatimonadota	Gemmatimonadaceae	Gemmatimonadaceae_unclassified
Otu0056	13910	3043	-1.97813	0.0299372	0.218233	Firmicutes	Bacillaceae	Bacillus
Otu0066	12695	3585	-3.04768	0.0296581	0.218233	Proteobacteria	Alteromonadaceae	Alteromonadaceae_unclassified
Otu0107	4393	1118	-2.18038	0.0310121	0.218233	Proteobacteria	Comamonadaceae	Rhodoferax
Otu0194	1749	286	-2.03231	0.0287537	0.218233	Bacteroidota	Paludibacteraceae	Paludibacter
Otu0377	612	26	-2.70105	0.0307347	0.218233	Campilobacterota	Arcobacteraceae	Arcobacteraceae_unclassified
Otu0150	2249	611	-2.33787	0.0334745	0.223164	Proteobacteria	Neisseriaceae	uncultured
Otu0173	1358	203	-2.16003	0.033458	0.223164	Patescibacteria	Saccharimonadaceae	Saccharimonadaceae_unclassified
Otu0197	1723	165	-2.38518	0.0325126	0.223164	Patescibacteria	Candidatus_Peribacteria_fa	Candidatus_Peribacteria_ge
Otu0215	838	339	-2.11752	0.0353379	0.231524	Actinobacteriota	Nocardioidaceae	Nocardioidaceae_unclassified
Otu0155	1503	436	-1.55747	0.0376603	0.234733	Proteobacteria	Caulobacteraceae	Caulobacteraceae_unclassified
Otu0240	764	112	-2.16576	0.0382986	0.234733	Myxococcota	Polyangiales_unclassified	Polyangiales_unclassified
Otu0321	624	100	-2.32897	0.0380118	0.234733	Actinobacteriota	Pseudonocardiaceae	Pseudonocardia
Otu0612	148	28	-2.19213	0.0382883	0.234733	Chloroflexi	A4b	A4b_unclassified
Otu0080	8538	1914	-1.83385	0.0394348	0.23786	Bacteroidota	Weeksellaceae	Cloacibacterium
Otu0250	646	87	-2.09678	0.0406219	0.239474	Actinobacteriota	Ilumatobacteraceae	Ilumatobacteraceae_unclassified
Otu0324	61	102	2.00122	0.0409627	0.239474	Firmicutes	Leuconostocaceae	Leuconostocaceae_unclassified
Otu0182	2081	283	-2.16987	0.0436008	0.247703	Chloroflexi	A4b	A4b_ge
Otu0447	290	47	-2.06178	0.043674	0.247703	Bacteroidota	Flavobacteriales_unclassified	Flavobacteriales_unclassified
Otu0030	26287	6407	-1.55674	0.0465067	0.252512	Proteobacteria	Sphingomonadaceae	Sphingomonadaceae_unclassified
Otu0136	3212	750	-2.12388	0.0456542	0.252512	Proteobacteria	Xanthomonadaceae	Xanthomonadaceae_unclassified
Otu0282	866	86	-2.07751	0.0465154	0.252512	Myxococcota	Polyangia_unclassified	Polyangia_unclassified
Otu0438	215	107	-2.17266	0.0482222	0.258091	Firmicutes	Ethanoligenenaceae	Ethanoligenens
Otu0060	1022	381	-2.5104	0.049902	0.263372	Firmicutes	Peptostreptococcales-Tissierellales_fa	Ezakiella
Otu0029	38675	9737	-1.65253	0.0560972	0.2674	Proteobacteria	Burkholderiales_unclassified	Burkholderiales_unclassified
Otu0033	26484	9335	-1.44324	0.0538055	0.2674	Actinobacteriota	Microbacteriaceae	Microbacteriaceae_unclassified
Otu0151	2069	565	-2.15603	0.0531719	0.2674	Actinobacteriota	uncultured_fa	uncultured_ge
Otu0180	1090	520	-2.61142	0.0528328	0.2674	Bacteroidota	Muribaculaceae	Muribaculaceae_ge
Otu0198	1414	116	-2.57002	0.057676	0.2674	Acidobacteriota	Vicinamibacteraceae	Vicinamibacteraceae_ge
Otu0233	782	186	-1.86012	0.0558302	0.2674	Bacteroidota	Sphingobacteriaceae	Sphingobacteriaceae_unclassified
Otu0252	1140	179	-2.17197	0.0535977	0.2674	Proteobacteria	A0839	A0839_ge
Otu0319	508	59	-2.1249	0.0570586	0.2674	Bacteroidota	Weeksellaceae	Chishuiella
Otu0429	272	33	-2.11737	0.0577021	0.2674	Proteobacteria	Comamonadaceae	Simplicispira
Otu0482	8	204	2.21185	0.0550986	0.2674	Firmicutes	Selenomonadaceae	Centipeda
Otu0021	45204	14482	-1.51181	0.0696169	0.273634	Proteobacteria	Moraxellaceae	Acinetobacter
Otu0048	6796	2263	-1.52935	0.0663397	0.273634	Proteobacteria	Rhizobiales_unclassified	Rhizobiales_unclassified
Otu0072	7034	1738	-1.8013	0.0680154	0.273634	Actinobacteriota	Microbacteriaceae	Rhodoluna
Otu0090	3697	538	-1.80525	0.0658215	0.273634	Proteobacteria	Rhodocyclaceae	Rhodocyclaceae_unclassified
Otu0105	1835	2712	1.53519	0.0698486	0.273634	Actinobacteriota	Micrococcaceae	Kocuria
Otu0138	1092	2959	1.77414	0.0664171	0.273634	Proteobacteria	Neisseriaceae	Neisseriaceae_unclassified
Otu0275	743	367	-2.11681	0.0663568	0.273634	Bacteroidota	Sphingobacteriales_unclassified	Sphingobacteriales_unclassified
Otu0331	1297	54	-2.45887	0.0643261	0.273634	Proteobacteria	Xanthomonadaceae	Pseudoxanthomonas
Otu0399	364	68	-1.97482	0.0698051	0.273634	Bacteroidota	Hymenobacteraceae	Hymenobacter
Otu0450	101	29	-1.89748	0.063756	0.273634	Proteobacteria	Xanthomonadales_unclassified	Xanthomonadales_unclassified
Otu0474	708	31	-2.16297	0.0654126	0.273634	Acidobacteriota	Vicinamibacteraceae	Vicinamibacteraceae_unclassified
Otu0478	360	44	-2.11009	0.0697236	0.273634	Actinobacteriota	Ilumatobacteraceae	CL500-29_marine_group
Otu0535	325	40	-2.14426	0.0669901	0.273634	Acidobacteriota	Blastocatellaceae	Blastocatella
Otu0756	97	32	-1.53816	0.0622968	0.273634	Proteobacteria	Pseudomonadales_unclassified	Pseudomonadales_unclassified
Otu0878	95	20	-1.80762	0.0692707	0.273634	Bacteroidota	Chitinophagaceae	Sediminibacterium
Otu0470	460	78	-1.82875	0.0707283	0.274252	Patescibacteria	Candidatus_Falkowbacteria_fa	Candidatus_Falkowbacteria_ge
Otu0012	110754	28184	-1.58277	0.0775667	0.279032	Proteobacteria	Comamonadaceae	Comamonadaceae_unclassified
Otu0027	27489	7417	-1.50283	0.076857	0.279032	Proteobacteria	Pseudomonadaceae	Pseudomonas
Otu0187	1596	497	-1.86887	0.0794904	0.279032	Proteobacteria	Oxalobacteraceae	Janthinobacterium
Otu0202	1598	291	-1.88578	0.0775488	0.279032	Chloroflexi	Anaerolineae_unclassified	Anaerolineae_unclassified
Otu0212	916	291	-1.94697	0.0736301	0.279032	Actinobacteriota	Microtrichales_unclassified	Microtrichales_unclassified
Otu0256	997	311	-2.10875	0.0798517	0.279032	Proteobacteria	Rhizobiales_Incertae_Sedis	uncultured
Otu0301	881	142	-1.84686	0.07622	0.279032	Proteobacteria	Rhodobacteraceae	Tabrizicola
Otu0401	351	46	-1.86968	0.080038	0.279032	Acidobacteriota	11-24_fa	11-24_ge
Otu0472	279	51	-2.02927	0.07358	0.279032	Proteobacteria	Alteromonadaceae	Alishewanella
Otu0504	272	41	-1.95049	0.0783131	0.279032	Actinobacteriota	Sporichthyaceae	hgcI_clade
Otu0630	313	21	-2.06355	0.0756107	0.279032	Proteobacteria	Yersiniaceae	Yersiniaceae_unclassified
Otu0175	254	25	-1.78338	0.0818491	0.282751	Firmicutes	Enterococcaceae	Enterococcaceae_unclassified
Otu0460	118	166	1.82839	0.0850621	0.291203	Proteobacteria	Erwiniaceae	Erwiniaceae_unclassified
Otu0261	543	156	-1.81401	0.0904175	0.304059	Bacteroidota	Weeksellaceae	Bergeyella
Otu0619	244	24	-1.89711	0.0898126	0.304059	Bacteroidota	Chitinophagales_unclassified	Chitinophagales_unclassified
Otu0013	119151	26729	-1.94072	0.0923036	0.307679	Proteobacteria	Alteromonadaceae	Rheinheimera
Otu0123	3238	726	-1.78023	0.0954169	0.313105	Proteobacteria	Legionellaceae	Legionella
Otu0253	914	430	-1.82867	0.0955795	0.313105	Proteobacteria	Sphingomonadaceae	Novosphingobium
Otu0073	7767	2205	-1.57185	0.0996565	0.3198	Proteobacteria	Comamonadaceae	Limnohabitans
Otu0094	5601	1212	-1.56296	0.100784	0.3198	Bdellovibrionota	0319-6G20_fa	0319-6G20_ge
Otu0102	2840	890	-1.27101	0.100679	0.3198	Proteobacteria	Sphingomonadaceae	Sphingomonas
Otu0110	4018	1135	-1.41095	0.102673	0.3198	Proteobacteria	Beijerinckiaceae	Beijerinckiaceae_unclassified
Otu0192	1253	468	-1.67083	0.102325	0.3198	Actinobacteriota	Nocardiaceae	Rhodococcus
Otu0414	345	60	-1.56703	0.101197	0.3198	Actinobacteriota	Nocardiaceae	Nocardiaceae_unclassified
Otu0053	15634	6576	-1.26385	0.105896	0.327158	Proteobacteria	Comamonadaceae	Pelomonas
Otu0083	2050	673	-1.44845	0.109315	0.329681	Proteobacteria	Proteobacteria_unclassified	Proteobacteria_unclassified
Otu0274	485	76	-1.7902	0.10867	0.329681	Proteobacteria	SM2D12	SM2D12_ge
Otu0337	930	131	-1.98722	0.108644	0.329681	Bacteroidota	uncultured	uncultured_ge
Otu0220	957	369	-1.52446	0.114676	0.330127	Bacteroidota	Saprospiraceae	uncultured
Otu0254	150	306	1.38357	0.111515	0.330127	Firmicutes	Carnobacteriaceae	Carnobacteriaceae_unclassified
Otu0258	946	301	-1.69328	0.114314	0.330127	Proteobacteria	Oxalobacteraceae	Duganella
Otu0333	744	139	-1.65463	0.114621	0.330127	Chloroflexi	Chloroflexi_unclassified	Chloroflexi_unclassified
Otu0493	147	42	-1.66426	0.113194	0.330127	Bacteroidota	Saprospiraceae	Phaeodactylibacter
Otu0497	260	45	-1.77526	0.111701	0.330127	Bdellovibrionota	Oligoflexia_unclassified	Oligoflexia_unclassified
Otu0044	25700	6285	-1.50946	0.121474	0.334493	Proteobacteria	Oxalobacteraceae	Oxalobacteraceae_unclassified
Otu0061	7193	2337	-1.20657	0.121301	0.334493	Proteobacteria	Alphaproteobacteria_unclassified	Alphaproteobacteria_unclassified
Otu0163	1878	483	-1.73193	0.121322	0.334493	Actinobacteriota	Microbacteriaceae	Microbacterium
Otu0244	697	95	-1.77879	0.119382	0.334493	Proteobacteria	Comamonadaceae	Malikia
Otu0346	214	37	-1.82177	0.117153	0.334493	Proteobacteria	Beijerinckiaceae	Bosea
Otu0370	305	102	-1.84577	0.12053	0.334493	Myxococcota	Nannocystaceae	Nannocystis
Otu0372	421	83	-1.80207	0.123269	0.336993	Patescibacteria	LWQ8	LWQ8_ge
Otu0454	350	79	-1.53967	0.124582	0.338152	Chloroflexi	SBR1031_unclassified	SBR1031_unclassified
Otu0191	1635	585	-1.57279	0.126329	0.340461	Bacteroidota	Crocinitomicaceae	Fluviicola
Otu0281	1159	146	-1.53062	0.12811	0.342831	Patescibacteria	Saccharimonadaceae	TM7a
Otu0097	5839	1159	-1.7572	0.129357	0.343745	Proteobacteria	Comamonadaceae	Aquabacterium
Otu0279	13	116	1.66935	0.131596	0.347267	Actinobacteriota	Coriobacteriales_unclassified	Coriobacteriales_unclassified
Otu0404	161	110	-1.74534	0.132989	0.348524	Proteobacteria	Rhodocyclaceae	Zoogloea
Otu0158	1813	396	-1.74379	0.134027	0.348837	Proteobacteria	Comamonadaceae	Tepidimonas
Otu0267	624	125	-1.64348	0.138232	0.357334	Bacteroidota	NS9_marine_group	NS9_marine_group_ge
Otu0168	1764	340	-1.56691	0.139557	0.358322	Verrucomicrobiota	Chlamydiaceae	uncultured
Otu0264	162	329	1.49192	0.14474	0.369135	Firmicutes	Planococcaceae	Planococcaceae_unclassified
Otu0213	1881	392	-1.59418	0.146082	0.370075	Proteobacteria	Oxalobacteraceae	Undibacterium
Otu0626	35	4	-1.3573	0.149694	0.376713	Proteobacteria	Sphingomonadaceae	Ellin6055
Otu0218	322	94	-1.54111	0.151888	0.379719	Proteobacteria	Alcaligenaceae	Alcaligenaceae_unclassified
Otu0268	1101	290	-1.56342	0.154112	0.382761	Bacteroidota	Spirosomaceae	Pseudarcicella
Otu0234	454	310	-1.17388	0.155675	0.384133	Proteobacteria	Caulobacteraceae	Caulobacter
Otu0160	1809	393	-1.48198	0.157473	0.386062	Bdellovibrionota	Bacteriovoracaceae	Peredibacter
Otu0126	2301	930	-1.13011	0.160998	0.389677	Proteobacteria	Pseudomonadaceae	Pseudomonadaceae_unclassified
Otu0170	1201	381	-1.38233	0.160425	0.389677	Firmicutes	Bacillales_unclassified	Bacillales_unclassified
Otu0096	5251	1458	-1.51051	0.164616	0.395913	Proteobacteria	Comamonadaceae	Paucibacter
Otu0077	4583	713	-1.40199	0.167471	0.400246	Proteobacteria	Oxalobacteraceae	Massilia
Otu0010	8124	11856	1.1215	0.17704	0.416053	Bacteroidota	Prevotellaceae	Prevotellaceae_unclassified
Otu0054	307	774	1.19711	0.181244	0.416053	Bacteroidota	Bacteroidaceae	Bacteroides
Otu0095	6203	929	-1.51276	0.175697	0.416053	Proteobacteria	Burkholderiaceae	Polynucleobacter
Otu0099	2827	1260	-1.09532	0.178271	0.416053	Actinobacteriota	Micrococcaceae	Micrococcus
Otu0143	887	561	-1.50297	0.18153	0.416053	Proteobacteria	Sphingomonadaceae	Sphingobium
Otu0492	206	51	-1.30295	0.181749	0.416053	Actinobacteriota	Micrococcaceae	Paenarthrobacter
Otu0503	275	47	-1.49055	0.180364	0.416053	Bacteroidota	Saprospiraceae	Saprospiraceae_unclassified
Otu0065	775	333	-1.39256	0.184463	0.417238	Firmicutes	Peptostreptococcales-Tissierellales_unclassified	Peptostreptococcales-Tissierellales_unclassified
Otu0127	5300	587	-1.45925	0.18346	0.417238	Proteobacteria	Rhodobacteraceae	Paracoccus
Otu0310	656	149	-1.4023	0.194999	0.433331	Proteobacteria	Methylophilaceae	Methylotenera
Otu0711	158	27	-1.43676	0.193817	0.433331	Firmicutes	Lachnospirales_unclassified	Lachnospirales_unclassified
Otu0839	134	15	-1.41215	0.194636	0.433331	Patescibacteria	ABY1_unclassified	ABY1_unclassified
Otu0015	110935	28286	-1.59377	0.206895	0.44457	Bacteroidota	Flavobacteriaceae	Flavobacterium
Otu0211	741	212	-1.28838	0.208771	0.44457	Patescibacteria	Candidatus_Kaiserbacteria_fa	Candidatus_Kaiserbacteria_ge
Otu0309	667	144	-1.30516	0.204402	0.44457	Dependentiae	UBA12409	UBA12409_ge
Otu0357	348	67	-1.36864	0.206567	0.44457	Proteobacteria	Moraxellaceae	Alkanindiges
Otu0371	176	101	-1.44096	0.203705	0.44457	Bdellovibrionota	uncultured	uncultured_ge
Otu0453	136	166	1.17072	0.208568	0.44457	Actinobacteriota	Actinomycetaceae	F0332
Otu0586	167	35	-1.22738	0.209416	0.44457	Verrucomicrobiota	Chlamydiaceae	Chlamydiaceae_unclassified
Otu0720	94	15	-1.24796	0.202531	0.44457	Deinococcota	Deinococcaceae	Deinococcaceae_unclassified
Otu0277	381	429	1.09144	0.21416	0.452116	Actinobacteriota	Dermabacteraceae	Dermabacteraceae_unclassified
Otu0034	24359	10564	-0.934795	0.220999	0.456412	Proteobacteria	Moraxellaceae	Moraxellaceae_unclassified
Otu0130	1658	947	-1.20384	0.219889	0.456412	Actinobacteriota	Micrococcaceae	Renibacterium
Otu0224	816	200	-1.27137	0.219437	0.456412	Actinobacteriota	Sporichthyaceae	Sporichthyaceae_unclassified
Otu0550	94	42	-0.92508	0.220317	0.456412	Actinobacteriota	Corynebacteriaceae	Corynebacteriaceae_ge
Otu0411	453	169	-1.20808	0.223567	0.459218	Bacteroidota	Chitinophagaceae	Chitinophagaceae_unclassified
Otu0156	971	284	-1.16601	0.225275	0.46024	Actinobacteriota	Corynebacteriaceae	Lawsonella
Otu0055	2926	4575	0.900859	0.232444	0.472347	Firmicutes	Lachnospiraceae	Lachnospiraceae_unclassified
Otu0188	1827	835	-1.08782	0.234343	0.473544	Proteobacteria	Burkholderiaceae	Lautropia
Otu0462	290	74	-1.26822	0.235526	0.473544	Proteobacteria	Comamonadaceae	Comamonas
Otu0049	5513	2384	-1.01282	0.244781	0.485801	Firmicutes	Peptostreptococcales-Tissierellales_fa	Finegoldia
Otu0100	4661	934	-1.39664	0.247315	0.485801	Bdellovibrionota	Bdellovibrionaceae	Bdellovibrio
Otu0169	874	347	-1.02917	0.2515	0.485801	Fusobacteriota	Leptotrichiaceae	Leptotrichia
Otu0196	321	185	-1.46019	0.252034	0.485801	Actinobacteriota	Actinomycetaceae	Mobiluncus
Otu0230	515	910	1.32731	0.248105	0.485801	Firmicutes	Selenomonadaceae	Selenomonadaceae_unclassified
Otu0241	319	311	1.24531	0.252434	0.485801	Actinobacteriota	Geodermatophilaceae	Blastococcus
Otu0305	392	308	1.41648	0.253128	0.485801	Bdellovibrionota	Silvanigrellaceae	Silvanigrella
Otu0374	565	134	-1.22775	0.248579	0.485801	Proteobacteria	Halieaceae	Halieaceae_unclassified
Otu0726	178	50	-1.28793	0.244359	0.485801	Verrucomicrobiota	Simkaniaceae	Simkaniaceae_unclassified
Otu0142	2552	702	-1.22923	0.261336	0.496897	Spirochaetota	Leptospiraceae	Turneriella
Otu0265	640	303	-1.15041	0.261549	0.496897	Actinobacteriota	Brevibacteriaceae	Brevibacterium
Otu0417	204	254	1.27201	0.262832	0.496897	Proteobacteria	Unknown_Family	Acidibacter
Otu0022	1889	1931	1.00083	0.26486	0.498252	Campilobacterota	Campylobacteraceae	Campylobacter
Otu0089	5197	901	-1.23379	0.267141	0.500067	Patescibacteria	Saccharimonadales_unclassified	Saccharimonadales_unclassified
Otu0153	1493	812	-0.979481	0.268567	0.500271	Proteobacteria	Xanthobacteraceae	Xanthobacteraceae_unclassified
Otu0070	6905	1184	-1.1366	0.276902	0.509895	Bacteroidota	Weeksellaceae	Weeksellaceae_unclassified
Otu0407	55	8	-1.05972	0.277758	0.509895	Campilobacterota	Campylobacterales_unclassified	Campylobacterales_unclassified
Otu0532	258	46	-1.16155	0.275241	0.509895	Proteobacteria	Comamonadaceae	Sphaerotilus
Otu0245	719	190	-1.1682	0.279657	0.510912	Bacteroidota	env.OPS_17	env.OPS_17_ge
Otu0032	21746	9640	-0.799516	0.30527	0.535429	Proteobacteria	Gammaproteobacteria_unclassified	Gammaproteobacteria_unclassified
Otu0087	3132	3527	0.94589	0.305758	0.535429	Proteobacteria	Pasteurellaceae	Pasteurellaceae_unclassified
Otu0259	330	42	-1.20029	0.301875	0.535429	Proteobacteria	Comamonadaceae	Polaromonas
Otu0273	559	277	-0.896484	0.301492	0.535429	Actinobacteriota	Nocardioidaceae	Marmoricola
Otu0343	537	97	-1.11119	0.295382	0.535429	Patescibacteria	Patescibacteria_unclassified	Patescibacteria_unclassified
Otu0360	499	202	-1.05942	0.304677	0.535429	Firmicutes	Bacillaceae	Geobacillus
Otu0362	307	65	-1.18988	0.30431	0.535429	Acidobacteriota	Acidobacteriae_unclassified	Acidobacteriae_unclassified
Otu0363	261	103	-1.2202	0.299644	0.535429	Proteobacteria	Xanthobacteraceae	Bradyrhizobium
Otu0746	66	29	-1.07278	0.300399	0.535429	Verrucomicrobiota	Verrucomicrobiota_unclassified	Verrucomicrobiota_unclassified
Otu0193	666	747	0.900412	0.308339	0.537471	Actinobacteriota	Bifidobacteriaceae	Alloscardovia
Otu0523	377	96	-1.22556	0.310115	0.538099	Myxococcota	Sandaracinaceae	Sandaracinus
Otu0176	677	155	-1.05874	0.315478	0.544917	Firmicutes	Hungateiclostridiaceae	Hungateiclostridiaceae_unclassified
Otu0271	922	302	-1.29011	0.322468	0.546933	Proteobacteria	Methylophilaceae	Methylophilus
Otu0289	589	100	-0.978349	0.319361	0.546933	Proteobacteria	Azospirillaceae	Azospirillaceae_unclassified
Otu0311	152	31	-1.00969	0.322582	0.546933	Firmicutes	Anaerovoracaceae	Anaerovoracaceae_unclassified
Otu0353	617	139	-1.11557	0.320604	0.546933	Planctomycetota	Gemmataceae	Gemmataceae_unclassified
Otu0469	203	91	-1.045	0.324258	0.546933	Verrucomicrobiota	Omnitrophaceae	Candidatus_Omnitrophus
Otu0554	142	29	-1.1295	0.325281	0.546933	Patescibacteria	Gracilibacteria_unclassified	Gracilibacteria_unclassified
Otu0023	1823	2081	1.1518	0.327701	0.548575	Actinobacteriota	Bifidobacteriaceae	Bifidobacterium
Otu0011	18511	21881	0.802953	0.33274	0.552145	Bacteroidota	Prevotellaceae	Prevotella
Otu0162	2604	480	-1.09984	0.332712	0.552145	Actinobacteriota	Microtrichaceae	IMCC26207
Otu0299	562	175	-1.17873	0.339439	0.560813	Proteobacteria	Sphingomonadaceae	Sphingopyxis
Otu0819	38	11	-0.90531	0.34235	0.563172	Myxococcota	Myxococcota_unclassified	Myxococcota_unclassified
Otu0174	901	659	-0.943136	0.345502	0.56348	Proteobacteria	Burkholderiaceae	Burkholderiaceae_unclassified
Otu0183	1133	905	-1.06845	0.345102	0.56348	Actinobacteriota	Acidimicrobiia_unclassified	Acidimicrobiia_unclassified
Otu0219	877	303	-1.01725	0.350217	0.568728	Dependentiae	Babeliales_unclassified	Babeliales_unclassified
Otu0139	835	1245	1.12002	0.355487	0.574829	Actinobacteriota	Atopobiaceae	Atopobium
Otu0291	238	263	-0.945919	0.361817	0.582587	Proteobacteria	Neisseriaceae	Kingella
Otu0177	821	211	-1.07705	0.363586	0.582964	Proteobacteria	Acetobacteraceae	Roseomonas
Otu0286	359	67	-1.01808	0.369463	0.589899	Proteobacteria	Moraxellaceae	Moraxellaceae_ge
Otu0111	600	312	-0.758632	0.375829	0.595062	Bacteroidota	Bacteroidales_unclassified	Bacteroidales_unclassified
Otu0190	1309	423	-0.932468	0.374716	0.595062	Planctomycetota	Gemmataceae	Fimbriiglobus
Otu0222	386	476	0.910265	0.377806	0.595711	Actinobacteriota	Frankiales_unclassified	Frankiales_unclassified
Otu0239	1013	376	-0.945673	0.382446	0.600535	Verrucomicrobiota	Chlamydiales_unclassified	Chlamydiales_unclassified
Otu0195	1533	238	-1.09621	0.385333	0.600813	Proteobacteria	Methylophilaceae	Methylophilaceae_unclassified
Otu0379	392	149	-1.04378	0.385785	0.600813	Proteobacteria	Burkholderiaceae	Burkholderia-Caballeronia-Paraburkholderia
Otu0120	1930	2671	0.767555	0.389644	0.604104	Proteobacteria	Neisseriaceae	Neisseria
Otu0529	307	65	-0.978698	0.391078	0.604104	Proteobacteria	Legionellaceae	Legionellaceae_unclassified
Otu0159	1574	700	-0.833263	0.402323	0.616462	Bacteroidota	Weeksellaceae	Chryseobacterium
Otu0292	494	207	-0.905559	0.402113	0.616462	Proteobacteria	Hyphomonadaceae	Hyphomonadaceae_unclassified
Otu0348	483	327	-0.857497	0.409761	0.625338	Actinobacteriota	Intrasporangiaceae	Intrasporangiaceae_unclassified
Otu0727	93	25	-0.947135	0.411604	0.625639	Acidobacteriota	Acidobacteriota_unclassified	Acidobacteriota_unclassified
Otu0645	257	67	-0.951042	0.417572	0.632181	Proteobacteria	Rickettsiaceae	Candidatus_Megaira
Otu0047	9640	7858	0.704414	0.42647	0.636707	Firmicutes	Lactobacillaceae	Lactobacillus
Otu0057	7020	32088	0.785306	0.428939	0.636707	Actinobacteriota	Corynebacteriaceae	Turicella
Otu0388	237	148	-0.867705	0.428487	0.636707	Actinobacteriota	PeM15_fa	PeM15_ge
Otu0944	14	4	-0.750553	0.42435	0.636707	Proteobacteria	Comamonadaceae	Roseateles
Otu1009	32	7	-0.812859	0.424321	0.636707	Bacteroidota	Paludibacteraceae	Paludibacteraceae_unclassified
Otu0118	1392	523	-0.657911	0.430618	0.636712	Proteobacteria	Xanthomonadaceae	Xanthomonas
Otu0064	6199	6641	0.636559	0.433515	0.638511	Firmicutes	Carnobacteriaceae	Granulicatella
Otu0747	23	122	0.82412	0.436578	0.640539	Cyanobacteria	Cyanobacteria_unclassified	Cyanobacteria_unclassified
Otu0313	681	149	-0.899594	0.441948	0.645924	Proteobacteria	Comamonadaceae	Variovorax
Otu0119	278	264	-0.838527	0.445185	0.647818	Proteobacteria	Shewanellaceae	Shewanella
Otu0340	375	121	-0.870503	0.446653	0.647818	Actinobacteriota	Pseudonocardiaceae	Pseudonocardiaceae_unclassified
Otu0093	2755	3041	0.582802	0.453795	0.653093	Proteobacteria	Pasteurellaceae	Haemophilus
Otu0189	439	400	0.773188	0.453557	0.653093	Proteobacteria	Rhizobiaceae	Allorhizobium-Neorhizobium-Pararhizobium-Rhizobium
Otu0251	74	53	-0.825359	0.455447	0.653093	Firmicutes	Ruminococcaceae	Ruminococcaceae_unclassified
Otu0948	20	6	-0.714352	0.457629	0.653755	Proteobacteria	Azospirillales_unclassified	Azospirillales_unclassified
Otu0696	63	176	0.731198	0.460088	0.654807	Proteobacteria	Aeromonadaceae	Aeromonadaceae_unclassified
Otu0002	21432	40192	1.23622	0.465509	0.657596	Proteobacteria	Enterobacteriaceae	Escherichia-Shigella
Otu0246	416	454	0.603275	0.464763	0.657596	Firmicutes	Staphylococcaceae	Staphylococcaceae_unclassified
Otu0040	6227	6724	0.543749	0.481801	0.67809	Firmicutes	Streptococcaceae	Streptococcaceae_unclassified
Otu0074	4990	3650	0.887728	0.497191	0.694605	Proteobacteria	Burkholderiaceae	Cupriavidus
Otu0378	303	186	-0.679083	0.49653	0.694605	Proteobacteria	Rhodocyclaceae	Dechloromonas
Otu0068	1084	618	-0.652736	0.520682	0.711837	Firmicutes	Peptostreptococcales-Tissierellales_fa	Peptostreptococcales-Tissierellales_fa_unclassified
Otu0078	685	407	-0.645628	0.52235	0.711837	Firmicutes	Veillonellaceae	Veillonellaceae_unclassified
Otu0129	1383	824	-0.594587	0.521557	0.711837	Proteobacteria	Xanthomonadaceae	Stenotrophomonas
Otu0137	1634	1618	0.513401	0.518045	0.711837	Proteobacteria	Aeromonadaceae	Aeromonas
Otu0223	954	207	-0.682734	0.522638	0.711837	Myxococcota	mle1-27_fa	mle1-27_ge
Otu0229	926	289	-0.695669	0.514632	0.711837	Actinobacteriota	Iamiaceae	Iamia
Otu0300	403	110	-0.688072	0.512331	0.711837	Cyanobacteria	Cyanobacteriales_unclassified	Cyanobacteriales_unclassified
Otu0227	1401	503	-0.831805	0.527486	0.715874	Proteobacteria	Hydrogenophilaceae	Hydrogenophilus
Otu0076	2756	1555	-0.537842	0.532917	0.72067	Firmicutes	Gemellaceae	Gemella
Otu0108	952	1891	0.718692	0.538588	0.723192	Proteobacteria	Marinomonadaceae	Marinomonas
Otu0185	580	200	-0.645754	0.537997	0.723192	Bacteroidota	Weeksellaceae	uncultured
Otu0165	1102	958	0.56101	0.542083	0.725323	Actinobacteriota	Propionibacteriaceae	Propionibacteriaceae_unclassified
Otu0578	60	91	0.612274	0.550468	0.733958	Actinobacteriota	Actinomycetaceae	Trueperella
Otu0017	40754	32921	0.466063	0.557604	0.735727	Actinobacteriota	Propionibacteriaceae	Cutibacterium
Otu0018	39473	34931	0.488573	0.556348	0.735727	Firmicutes	Veillonellaceae	Veillonella
Otu0134	1142	942	-0.552554	0.5545	0.735727	Firmicutes	Aerococcaceae	Facklamia
Otu0081	242	258	0.66651	0.56157	0.738397	Firmicutes	Peptostreptococcales-Tissierellales_fa	Fenollaria
Otu0042	6548	3936	-0.43616	0.578841	0.758481	Firmicutes	Lactobacillales_unclassified	Lactobacillales_unclassified
Otu0003	173777	179657	0.408881	0.593512	0.76034	Firmicutes	Streptococcaceae	Streptococcus
Otu0005	98793	97885	0.404854	0.601584	0.76034	Firmicutes	Staphylococcaceae	Staphylococcus
Otu0024	26234	16405	-0.38841	0.588138	0.76034	Actinobacteriota	Actinobacteria_unclassified	Actinobacteria_unclassified
Otu0062	2872	1712	-0.427544	0.593627	0.76034	Proteobacteria	Rhizobiaceae	Rhizobiaceae_unclassified
Otu0071	5163	3518	-0.375155	0.598811	0.76034	Actinobacteriota	Corynebacteriaceae	Corynebacteriaceae_unclassified
Otu0172	336	113	-0.59008	0.591552	0.76034	Firmicutes	Aerococcaceae	Aerococcaceae_unclassified
Otu0217	800	429	-0.500246	0.595044	0.76034	Proteobacteria	Comamonadaceae	Acidovorax
Otu0263	733	197	-0.568119	0.595689	0.76034	Patescibacteria	Gracilibacteria_fa	Gracilibacteria_ge
Otu0386	167	242	0.588492	0.598994	0.76034	Cyanobacteria	Gastranaerophilales_fa	Gastranaerophilales_ge
Otu0409	182	122	-0.613359	0.589349	0.76034	Proteobacteria	Sphingomonadaceae	Rhizorhapis
Otu0428	284	108	0.5518	0.602269	0.76034	Acidobacteriota	Vicinamibacterales_unclassified	Vicinamibacterales_unclassified
Otu0144	443	364	0.591102	0.608991	0.761239	Firmicutes	Oscillospirales_unclassified	Oscillospirales_unclassified
Otu0145	1286	821	0.534045	0.6081	0.761239	Actinobacteriota	Dermabacteraceae	Dermabacter
Otu0770	41	19	-0.503343	0.60899	0.761239	Proteobacteria	Oceanospirillales_unclassified	Oceanospirillales_unclassified
Otu0755	58	33	-0.467801	0.617278	0.769068	Proteobacteria	Enterobacteriaceae	Plesiomonas
Otu0014	5582	5340	-0.461582	0.645472	0.781622	Proteobacteria	Enterobacteriaceae	Klebsiella
Otu0020	41121	29453	-0.325607	0.647548	0.781622	Actinobacteriota	Corynebacteriaceae	Corynebacterium
Otu0037	17535	19103	0.338852	0.636758	0.781622	Proteobacteria	Moraxellaceae	Moraxella
Otu0050	2595	1391	-0.365946	0.62972	0.781622	Firmicutes	Peptostreptococcales-Tissierellales_fa	Peptoniphilus
Otu0161	1399	1089	-0.449886	0.633596	0.781622	Bacteroidota	Prevotellaceae	Alloprevotella
Otu0205	725	383	-0.383656	0.647923	0.781622	Bacteroidota	Sphingobacteriaceae	Pedobacter
Otu0287	253	207	0.504318	0.639881	0.781622	Firmicutes	Selenomonadaceae	Selenomonas
Otu0434	185	156	0.432068	0.645661	0.781622	Actinobacteriota	Propionibacteriales_unclassified	Propionibacteriales_unclassified
Otu0588	278	93	-0.519168	0.645535	0.781622	Verrucomicrobiota	Rubritaleaceae	Luteolibacter
Otu1227	11	6	-0.455912	0.632755	0.781622	Proteobacteria	Sphingomonadaceae	Erythrobacter
Otu0181	179	191	-0.503858	0.654171	0.786661	Actinobacteriota	Bifidobacteriaceae	Bifidobacteriaceae_unclassified
Otu0025	25381	25849	0.337171	0.667693	0.795371	Actinobacteriota	Micrococcaceae	Rothia
Otu0101	1021	1181	0.447472	0.667577	0.795371	Fusobacteriota	Fusobacteriaceae	Fusobacterium
Otu0135	103	101	-0.525983	0.665182	0.795371	Bacteroidota	Flavobacteriaceae	Myroides
Otu0132	1592	1141	-0.30732	0.670882	0.796672	Actinobacteriota	Corynebacteriales_unclassified	Corynebacteriales_unclassified
Otu0764	94	32	-0.422187	0.676343	0.800655	Proteobacteria	Alteromonadales_Incertae_Sedis	Alkalimonas
Otu0963	43	12	-0.436647	0.679996	0.802479	Planctomycetota	Pirellulaceae	Pirellulaceae_unclassified
Otu0114	3136	2057	-0.396937	0.691101	0.81306	Firmicutes	Peptostreptococcales-Tissierellales_fa	Helcococcus
Otu0035	873	980	0.432844	0.695654	0.81589	Firmicutes	Veillonellaceae	Dialister
Otu0426	325	145	0.437062	0.702724	0.821647	Actinobacteriota	Atopobiaceae	Olsenella
Otu0088	1407	543	-0.327776	0.709297	0.826788	Proteobacteria	Mitochondria	Mitochondria_ge
Otu0016	21697	74253	0.368247	0.714238	0.829535	Firmicutes	Streptococcaceae	Lactococcus
Otu0237	411	332	-0.354227	0.71602	0.829535	Bacteroidota	Kapabacteriales_fa	Kapabacteriales_ge
Otu0206	554	916	0.388138	0.731746	0.842192	Proteobacteria	Pasteurellaceae	Aggregatibacter
Otu0249	35	21	-0.281913	0.733934	0.842192	Bacteroidota	Bacteroidota_unclassified	Bacteroidota_unclassified
Otu0342	312	264	0.38925	0.73581	0.842192	Proteobacteria	Sphingomonadaceae	Sphingorhabdus
Otu0416	447	207	-0.395412	0.732576	0.842192	Bacteroidota	Flavobacteriaceae	Citreitalea
Otu0039	21713	10257	-0.283449	0.744626	0.849724	Actinobacteriota	Actinomycetaceae	Actinomyces
Otu0201	1022	601	0.307737	0.752505	0.856144	Bacteroidota	Flavobacteriaceae	Capnocytophaga
Otu0272	362	261	0.327698	0.761156	0.86079	Firmicutes	Lachnospiraceae	Stomatobaculum
Otu0418	433	86	-0.384342	0.763412	0.86079	Actinobacteriota	Micrococcaceae	Arthrobacter
Otu0480	47	29	-0.22722	0.762299	0.86079	Firmicutes	Veillonellales-Selenomonadales_unclassified	Veillonellales-Selenomonadales_unclassified
Otu0511	134	132	0.304365	0.76565	0.86079	Proteobacteria	Rhodobacteraceae	Rhodobacter
Otu0148	704	502	-0.205478	0.771398	0.864694	Firmicutes	Firmicutes_unclassified	Firmicutes_unclassified
Otu0121	2157	1566	-0.191618	0.786954	0.876958	Actinobacteriota	Actinomycetaceae	Actinomycetaceae_unclassified
Otu0290	316	223	0.310492	0.785984	0.876958	Acidobacteriota	uncultured	uncultured_ge
Otu0079	5464	3068	-0.189486	0.804619	0.894021	Proteobacteria	Moraxellaceae	Enhydrobacter
Otu0045	16960	12399	-0.266746	0.808199	0.895381	Proteobacteria	Burkholderiaceae	Ralstonia
Otu0339	200	341	0.27318	0.811287	0.896189	Proteobacteria	Enterobacteriaceae	Raoultella
Otu0439	317	113	-0.245495	0.821009	0.9043	Proteobacteria	Comamonadaceae	Curvibacter
Otu0306	1028	283	0.265617	0.836185	0.915959	Spirochaetota	Spirochaetaceae	Spirochaetaceae_unclassified
Otu0471	256	53	-0.235085	0.836415	0.915959	Proteobacteria	Rhodanobacteraceae	Tahibacter
Otu0140	2258	1242	-0.184673	0.843196	0.920731	Proteobacteria	Comamonadaceae	Diaphorobacter
Otu0596	227	42	-0.221166	0.847029	0.922266	Bdellovibrionota	Bacteriovoracaceae	Bacteriovoracaceae_unclassified
Otu0382	228	164	0.232161	0.851756	0.924763	Patescibacteria	Saccharimonadaceae	Saccharimonadaceae_ge
Otu0266	504	194	0.22577	0.857026	0.927834	Proteobacteria	Rickettsiaceae	Rickettsiaceae_unclassified
Otu0008	19239	23014	-0.153464	0.866861	0.934235	Proteobacteria	Enterobacterales_unclassified	Enterobacterales_unclassified
Otu0166	1269	852	-0.152058	0.869118	0.934235	Actinobacteriota	Nocardioidaceae	Nocardioides
Otu0597	292	135	0.198461	0.870314	0.934235	Deinococcota	Trueperaceae	Truepera
Otu0109	5343	2355	-0.146797	0.875535	0.937193	Proteobacteria	Beijerinckiaceae	Methylobacterium-Methylorubrum
Otu0006	63880	55049	0.157405	0.882635	0.941454	Firmicutes	Peptostreptococcales-Tissierellales_fa	Anaerococcus
Otu0207	486	315	-0.123659	0.884471	0.941454	Actinobacteriota	Actinobacteriota_unclassified	Actinobacteriota_unclassified
Otu0312	210	334	-0.148705	0.892826	0.947692	Firmicutes	Lachnospiraceae	Lachnoanaerobaculum
Otu0052	10495	9207	0.0894919	0.906772	0.954496	Actinobacteriota	Micrococcales_unclassified	Micrococcales_unclassified
Otu0365	307	242	-0.114918	0.904945	0.954496	Firmicutes	Leuconostocaceae	Weissella
Otu0436	132	207	0.145572	0.905157	0.954496	Actinobacteriota	Solirubrobacteraceae	Solirubrobacteraceae_unclassified
Otu0117	672	460	-0.0853894	0.910571	0.955848	Firmicutes	Clostridia_unclassified	Clostridia_unclassified
Otu0178	1101	657	-0.1158	0.913227	0.955996	Proteobacteria	Chromobacteriaceae	Vogesella
Otu0116	479	479	-0.0841858	0.921665	0.956331	Actinobacteriota	Atopobiaceae	Atopobiaceae_unclassified
Otu0293	335	191	-0.105473	0.919259	0.956331	Actinobacteriota	Microbacteriaceae	Aurantimicrobium
Otu0329	478	295	-0.127952	0.922839	0.956331	Myxococcota	Myxococcaceae	Myxococcaceae_unclassified
Otu0496	151	51	0.109473	0.923614	0.956331	Actinobacteriota	Thermoleophilia_unclassified	Thermoleophilia_unclassified
Otu0043	1468	638	0.071734	0.936432	0.964347	Bacteroidota	Porphyromonadaceae	Porphyromonas
Otu0147	439	379	-0.0867454	0.934531	0.964347	Firmicutes	Peptostreptococcales-Tissierellales_fa	Parvimonas
Otu0038	18488	15162	0.0439642	0.951229	0.974304	Proteobacteria	Moraxellaceae	Psychrobacter
Otu0146	299	276	0.0731747	0.950703	0.974304	Actinobacteriota	Actinomycetaceae	Varibaculum
Otu0059	4490	5454	0.0431405	0.962896	0.978343	Firmicutes	Leuconostocaceae	Leuconostoc
Otu0082	4597	3139	-0.039033	0.957788	0.978343	Actinobacteriota	Micrococcaceae	Micrococcaceae_unclassified
Otu0385	215	213	-0.0538808	0.961869	0.978343	Myxococcota	Polyangiaceae	Polyangiaceae_unclassified
Otu0085	334	629	0.0473759	0.96761	0.980302	Proteobacteria	Vibrionaceae	Vibrionaceae_unclassified
Otu0338	148	117	-0.0368457	0.970061	0.980302	Actinobacteriota	Geodermatophilaceae	Geodermatophilaceae_unclassified
Otu0455	240	391	-0.0349632	0.972563	0.980302	Actinobacteriota	Microbacteriaceae	Leucobacter
Otu0001	20509	32034	-0.0270407	0.977727	0.9829	Proteobacteria	Enterobacteriaceae	Enterobacteriaceae_unclassified
Otu0209	642	264	-0.020512	0.98619	0.988792	Myxococcota	Myxococcaceae	uncultured
Otu0075	1743	1372	0.00032207	0.999673	0.999673	Firmicutes	Bacilli_unclassified	Bacilli_unclassified

## Sheet: tumor tissues
Supplementary Table 3: Low-grade tumors sex-related differences in tumor tissues
						Taxonomic level
OTU	counts in male group	counts in female group	fold change	pvalues	adjPvalues	Phylum	Family	Genus
Otu0092	13	513	3.59274	0.00602524	0.283807	Proteobacteria	Enterobacteriaceae	Salmonella
Otu0129	496	4020	2.07531	0.0103037	0.283807	Proteobacteria	Xanthomonadaceae	Stenotrophomonas
Otu0143	265	7040	3.5434	0.00188404	0.283807	Proteobacteria	Sphingomonadaceae	Sphingobium
Otu0268	117	618	2.41617	0.00568485	0.283807	Bacteroidota	Spirosomaceae	Pseudarcicella
Otu0293	139	782	3.06164	0.00449882	0.283807	Actinobacteriota	Microbacteriaceae	Aurantimicrobium
Otu0300	85	978	2.92146	0.00293761	0.283807	Cyanobacteria	Cyanobacteriales_unclassified	Cyanobacteriales_unclassified
Otu0325	52	474	3.37341	0.00547777	0.283807	Bacteroidota	Rikenellaceae	Alistipes
Otu0349	88	510	2.95541	0.00609308	0.283807	Bacteroidota	Prolixibacteraceae	WCHB1-32
Otu0377	58	372	2.54285	0.00851735	0.283807	Campilobacterota	Arcobacteraceae	Arcobacteraceae_unclassified
Otu0426	41	360	2.97033	0.00879585	0.283807	Actinobacteriota	Atopobiaceae	Olsenella
Otu0438	13	559	3.7212	0.00358546	0.283807	Firmicutes	Ethanoligenenaceae	Ethanoligenens
Otu0503	26	169	2.63599	0.00906596	0.283807	Bacteroidota	Saprospiraceae	Saprospiraceae_unclassified
Otu0576	23	279	2.38903	0.00879261	0.283807	Proteobacteria	Devosiaceae	Devosiaceae_unclassified
Otu0733	5	112	2.6984	0.0103742	0.283807	Bacteroidota	Spirosomaceae	Arcicella
Otu0190	272	951	2.08798	0.0126504	0.302818	Planctomycetota	Gemmataceae	Fimbriiglobus
Otu0290	124	1167	2.66972	0.0124505	0.302818	Acidobacteriota	uncultured	uncultured_ge
Otu0387	302	439	3.20106	0.0161821	0.364574	Firmicutes	Staphylococcaceae	Jeotgalicoccus
Otu0081	4206	179	-2.97601	0.0188642	0.366833	Firmicutes	Peptostreptococcales-Tissierellales_fa	Fenollaria
Otu0171	507	250	-2.83275	0.0175144	0.366833	Firmicutes	Peptostreptococcaceae	Peptostreptococcaceae_unclassified
Otu0416	92	252	1.942	0.0191558	0.366833	Bacteroidota	Flavobacteriaceae	Citreitalea
Otu0211	286	739	2.33463	0.0251371	0.458453	Patescibacteria	Candidatus_Kaiserbacteria_fa	Candidatus_Kaiserbacteria_ge
Otu0432	76	678	3.02516	0.0266982	0.464791	Proteobacteria	Devosiaceae	Devosia
Otu0282	157	427	2.03274	0.0285616	0.475613	Myxococcota	Polyangia_unclassified	Polyangia_unclassified
Otu0303	107	326	2.00331	0.0359369	0.491566	Proteobacteria	Hyphomicrobiaceae	Hyphomicrobium
Otu0305	143	236	2.13639	0.0351187	0.491566	Bdellovibrionota	Silvanigrellaceae	Silvanigrella
Otu0363	204	558	2.1575	0.0345325	0.491566	Proteobacteria	Xanthobacteraceae	Bradyrhizobium
Otu0454	63	175	1.60731	0.0340801	0.491566	Chloroflexi	SBR1031_unclassified	SBR1031_unclassified
Otu0965	5	46	2.01401	0.0319887	0.491566	Verrucomicrobiota	Parachlamydiaceae	Parachlamydiaceae_unclassified
Otu0299	163	612	2.24342	0.0385533	0.50917	Proteobacteria	Sphingomonadaceae	Sphingopyxis
Otu0131	325	5142	2.38392	0.0426578	0.544598	Proteobacteria	Rickettsiales_unclassified	Rickettsiales_unclassified
Otu0467	28	627	2.62638	0.0444264	0.548881	Firmicutes	Clostridia_UCG-014_fa	Clostridia_UCG-014_ge
Otu0292	130	490	1.58824	0.0488844	0.567355	Proteobacteria	Hyphomonadaceae	Hyphomonadaceae_unclassified
Otu0337	110	269	1.91394	0.0479316	0.567355	Bacteroidota	uncultured	uncultured_ge
Otu0386	156	415	1.59962	0.0566289	0.619682	Cyanobacteria	Gastranaerophilales_fa	Gastranaerophilales_ge
Otu0504	86	257	2.01731	0.0556939	0.619682	Actinobacteriota	Sporichthyaceae	hgcI_clade
Otu0185	80	622	2.2982	0.0628956	0.644158	Bacteroidota	Weeksellaceae	uncultured
Otu0257	203	401	1.68154	0.0706387	0.644158	Bacteroidota	NS11-12_marine_group	NS11-12_marine_group_ge
Otu0313	69	243	1.43887	0.0676405	0.644158	Proteobacteria	Comamonadaceae	Variovorax
Otu0428	66	272	1.78413	0.0642585	0.644158	Acidobacteriota	Vicinamibacterales_unclassified	Vicinamibacterales_unclassified
Otu0462	41	321	2.12358	0.0646941	0.644158	Proteobacteria	Comamonadaceae	Comamonas
Otu0472	71	258	1.70747	0.0701964	0.644158	Proteobacteria	Alteromonadaceae	Alishewanella
Otu0720	42	171	1.86919	0.0669118	0.644158	Deinococcota	Deinococcaceae	Deinococcaceae_unclassified
Otu0150	737	2127	1.55288	0.0724762	0.645544	Proteobacteria	Neisseriaceae	uncultured
Otu0060	1444	440	-1.98362	0.0769585	0.669889	Firmicutes	Peptostreptococcales-Tissierellales_fa	Ezakiella
Otu0106	157	11704	2.7764	0.102339	0.689839	Proteobacteria	Comamonadaceae	Delftia
Otu0128	493	1671	1.97637	0.115273	0.689839	Proteobacteria	Acetobacteraceae	Acetobacteraceae_unclassified
Otu0197	177	439	1.6877	0.104685	0.689839	Patescibacteria	Candidatus_Peribacteria_fa	Candidatus_Peribacteria_ge
Otu0215	426	849	1.53363	0.113609	0.689839	Actinobacteriota	Nocardioidaceae	Nocardioidaceae_unclassified
Otu0272	223	874	1.53321	0.0949707	0.689839	Firmicutes	Lachnospiraceae	Stomatobaculum
Otu0279	126	48	-1.62052	0.114625	0.689839	Actinobacteriota	Coriobacteriales_unclassified	Coriobacteriales_unclassified
Otu0281	315	102	-1.30844	0.108842	0.689839	Patescibacteria	Saccharimonadaceae	TM7a
Otu0287	687	639	-2.17011	0.0894795	0.689839	Firmicutes	Selenomonadaceae	Selenomonas
Otu0295	82	430	1.73727	0.103953	0.689839	Proteobacteria	Sphingomonadaceae	Porphyrobacter
Otu0315	105	811	1.88164	0.0925144	0.689839	Proteobacteria	Halieaceae	OM60	100)
Otu0320	289	513	1.44596	0.100554	0.689839	Bdellovibrionota	Silvanigrellaceae	Silvanigrellaceae_unclassified
Otu0332	156	769	1.76402	0.104237	0.689839	Proteobacteria	Hyphomicrobiaceae	Hyphomicrobiaceae_unclassified
Otu0335	71	626	1.77521	0.0886019	0.689839	Proteobacteria	Hyphomonadaceae	SWB02
Otu0442	263	147	-1.58364	0.10429	0.689839	Planctomycetota	Phycisphaeraceae	SM1A02
Otu0453	272	85	-1.66219	0.106139	0.689839	Actinobacteriota	Actinomycetaceae	F0332
Otu0459	65	199	1.44385	0.108462	0.689839	Proteobacteria	Comamonadaceae	Hydrogenophaga
Otu0488	7	55	1.44267	0.0926127	0.689839	Firmicutes	Clostridiales_unclassified	Clostridiales_unclassified
Otu0518	124	179	-1.87544	0.0981444	0.689839	Actinobacteriota	Gaiellales_unclassified	Gaiellales_unclassified
Otu0529	19	88	1.7166	0.103056	0.689839	Proteobacteria	Legionellaceae	Legionellaceae_unclassified
Otu0532	30	218	1.71868	0.110721	0.689839	Proteobacteria	Comamonadaceae	Sphaerotilus
Otu0023	631	213534	2.6346	0.120834	0.701201	Actinobacteriota	Bifidobacteriaceae	Bifidobacterium
Otu0141	145	813	1.65493	0.120469	0.701201	Firmicutes	Ethanoligenenaceae	Ethanoligenenaceae_unclassified
Otu0323	239	715	1.40029	0.131333	0.739714	Firmicutes	Lachnospiraceae	Oribacterium
Otu0381	135	236	1.66757	0.130379	0.739714	Firmicutes	Paenibacillaceae	Paenibacillaceae_unclassified
Otu0168	507	662	1.29502	0.13741	0.741241	Verrucomicrobiota	Chlamydiaceae	uncultured
Otu0191	278	802	1.25594	0.136117	0.741241	Bacteroidota	Crocinitomicaceae	Fluviicola
Otu0250	257	920	1.92239	0.135307	0.741241	Actinobacteriota	Ilumatobacteraceae	Ilumatobacteraceae_unclassified
Otu0223	203	754	1.69236	0.145591	0.766693	Myxococcota	mle1-27_fa	mle1-27_ge
Otu0226	223	1051	1.62577	0.146132	0.766693	Myxococcota	Haliangiaceae	Haliangium
Otu0311	508	286	-1.2037	0.152112	0.787284	Firmicutes	Anaerovoracaceae	Anaerovoracaceae_unclassified
Otu0164	5664	493	-1.90542	0.156811	0.795061	Firmicutes	Aerococcaceae	Aerococcus
Otu0495	42	150	1.47812	0.157767	0.795061	Chloroflexi	Roseiflexaceae	Roseiflexaceae_unclassified
Otu0054	536	1227	1.07938	0.187237	0.811626	Bacteroidota	Bacteroidaceae	Bacteroides
Otu0098	1689	1765	-1.88076	0.17164	0.811626	Patescibacteria	Saccharimonadales_fa	Saccharimonadales_ge
Otu0112	3188	1264	-1.33716	0.180614	0.811626	Firmicutes	Bacillaceae	Bacillaceae_unclassified
Otu0116	1276	647	-1.77051	0.198523	0.811626	Actinobacteriota	Atopobiaceae	Atopobiaceae_unclassified
Otu0153	736	2581	1.54863	0.193057	0.811626	Proteobacteria	Xanthobacteraceae	Xanthobacteraceae_unclassified
Otu0178	677	910	1.83471	0.1718	0.811626	Proteobacteria	Chromobacteriaceae	Vogesella
Otu0213	279	547	1.06012	0.18973	0.811626	Proteobacteria	Oxalobacteraceae	Undibacterium
Otu0216	298	888	1.52475	0.165165	0.811626	Proteobacteria	Comamonadaceae	Giesbergeria
Otu0224	270	853	1.51012	0.169095	0.811626	Actinobacteriota	Sporichthyaceae	Sporichthyaceae_unclassified
Otu0239	281	410	0.955704	0.199198	0.811626	Verrucomicrobiota	Chlamydiales_unclassified	Chlamydiales_unclassified
Otu0245	258	287	1.26218	0.19116	0.811626	Bacteroidota	env.OPS_17	env.OPS_17_ge
Otu0252	165	270	1.31931	0.185903	0.811626	Proteobacteria	A0839	A0839_ge
Otu0338	259	101	-1.4742	0.198956	0.811626	Actinobacteriota	Geodermatophilaceae	Geodermatophilaceae_unclassified
Otu0385	174	422	1.65401	0.177041	0.811626	Myxococcota	Polyangiaceae	Polyangiaceae_unclassified
Otu0406	73	170	1.16556	0.189327	0.811626	Proteobacteria	Cellvibrionaceae	Cellvibrionaceae_unclassified
Otu0439	60	210	1.32714	0.188387	0.811626	Proteobacteria	Comamonadaceae	Curvibacter
Otu0595	29	215	1.51802	0.18595	0.811626	Gemmatimonadota	Gemmatimonadaceae	Gemmatimonas
Otu0736	102	19	-1.39857	0.191027	0.811626	Gemmatimonadota	Gemmatimonadaceae	Gemmatimonadaceae_unclassified
Otu1009	8	23	1.12718	0.203073	0.818706	Bacteroidota	Paludibacteraceae	Paludibacteraceae_unclassified
Otu0251	25	121	1.36193	0.206343	0.820673	Firmicutes	Ruminococcaceae	Ruminococcaceae_unclassified
Otu0764	20	52	1.00863	0.207847	0.820673	Proteobacteria	Alteromonadales_Incertae_Sedis	Alkalimonas
Otu0007	47536	111169	-1.50137	0.26548	0.82404	Bacteroidota	Flavobacteriaceae	Flavobacteriaceae_unclassified
Otu0015	20579	65324	-1.87251	0.271296	0.82404	Bacteroidota	Flavobacteriaceae	Flavobacterium
Otu0030	9185	46858	1.02044	0.307383	0.82404	Proteobacteria	Sphingomonadaceae	Sphingomonadaceae_unclassified
Otu0035	5290	809	-1.57538	0.220415	0.82404	Firmicutes	Veillonellaceae	Dialister
Otu0102	1343	5881	1.52809	0.218327	0.82404	Proteobacteria	Sphingomonadaceae	Sphingomonas
Otu0110	660	3793	1.13025	0.311161	0.82404	Proteobacteria	Beijerinckiaceae	Beijerinckiaceae_unclassified
Otu0136	354	2268	1.05636	0.302072	0.82404	Proteobacteria	Xanthomonadaceae	Xanthomonadaceae_unclassified
Otu0159	522	1274	1.10717	0.233407	0.82404	Bacteroidota	Weeksellaceae	Chryseobacterium
Otu0162	504	821	0.870139	0.312774	0.82404	Actinobacteriota	Microtrichaceae	IMCC26207
Otu0169	745	2160	1.16948	0.281004	0.82404	Fusobacteriota	Leptotrichiaceae	Leptotrichia
Otu0170	818	785	-0.89243	0.305739	0.82404	Firmicutes	Bacillales_unclassified	Bacillales_unclassified
Otu0181	174	5038	1.7719	0.225197	0.82404	Actinobacteriota	Bifidobacteriaceae	Bifidobacteriaceae_unclassified
Otu0187	453	925	1.2458	0.256867	0.82404	Proteobacteria	Oxalobacteraceae	Janthinobacterium
Otu0193	518	1720	0.983101	0.280328	0.82404	Actinobacteriota	Bifidobacteriaceae	Alloscardovia
Otu0196	2506	46	-1.36204	0.310032	0.82404	Actinobacteriota	Actinomycetaceae	Mobiluncus
Otu0207	651	628	-1.16671	0.247825	0.82404	Actinobacteriota	Actinobacteriota_unclassified	Actinobacteriota_unclassified
Otu0225	242	732	1.60724	0.218062	0.82404	Proteobacteria	Rhodocyclaceae	C39
Otu0229	326	1126	1.25682	0.243933	0.82404	Actinobacteriota	Iamiaceae	Iamia
Otu0249	147	46	-0.917668	0.289155	0.82404	Bacteroidota	Bacteroidota_unclassified	Bacteroidota_unclassified
Otu0259	157	210	1.01646	0.250937	0.82404	Proteobacteria	Comamonadaceae	Polaromonas
Otu0261	165	780	0.978259	0.280246	0.82404	Bacteroidota	Weeksellaceae	Bergeyella
Otu0265	199	524	1.12713	0.271759	0.82404	Actinobacteriota	Brevibacteriaceae	Brevibacterium
Otu0266	221	946	1.35489	0.271289	0.82404	Proteobacteria	Rickettsiaceae	Rickettsiaceae_unclassified
Otu0267	264	1020	1.38311	0.275651	0.82404	Bacteroidota	NS9_marine_group	NS9_marine_group_ge
Otu0271	149	575	1.18717	0.214854	0.82404	Proteobacteria	Methylophilaceae	Methylophilus
Otu0285	242	305	0.865523	0.294516	0.82404	Proteobacteria	Comamonadaceae	Inhella
Otu0301	155	465	1.13003	0.225095	0.82404	Proteobacteria	Rhodobacteraceae	Tabrizicola
Otu0307	258	832	1.15734	0.314125	0.82404	Bacteroidota	Sphingobacteriaceae	Sphingobacterium
Otu0312	231	442	1.09851	0.279409	0.82404	Firmicutes	Lachnospiraceae	Lachnoanaerobaculum
Otu0321	179	279	1.26633	0.305503	0.82404	Actinobacteriota	Pseudonocardiaceae	Pseudonocardia
Otu0331	180	309	-1.3522	0.267619	0.82404	Proteobacteria	Xanthomonadaceae	Pseudoxanthomonas
Otu0342	151	594	1.18555	0.251176	0.82404	Proteobacteria	Sphingomonadaceae	Sphingorhabdus
Otu0343	79	267	1.00845	0.243577	0.82404	Patescibacteria	Patescibacteria_unclassified	Patescibacteria_unclassified
Otu0350	156	113	-1.19115	0.261636	0.82404	Firmicutes	Anaerovoracaceae	Mogibacterium
Otu0354	199	345	1.15524	0.237909	0.82404	Proteobacteria	Cellvibrionales_unclassified	Cellvibrionales_unclassified
Otu0378	98	395	1.05598	0.305211	0.82404	Proteobacteria	Rhodocyclaceae	Dechloromonas
Otu0388	130	286	0.953264	0.282551	0.82404	Actinobacteriota	PeM15_fa	PeM15_ge
Otu0392	32	90	0.976423	0.27126	0.82404	Bacteroidota	Crocinitomicaceae	Crocinitomicaceae_unclassified
Otu0397	85	384	1.21712	0.268371	0.82404	Proteobacteria	Diplorickettsiaceae	Rickettsiella
Otu0429	124	361	0.932893	0.256687	0.82404	Proteobacteria	Comamonadaceae	Simplicispira
Otu0455	40	153	1.00697	0.296203	0.82404	Actinobacteriota	Microbacteriaceae	Leucobacter
Otu0474	116	75	-0.834858	0.282778	0.82404	Acidobacteriota	Vicinamibacteraceae	Vicinamibacteraceae_unclassified
Otu0478	104	138	1.22158	0.232657	0.82404	Actinobacteriota	Ilumatobacteraceae	CL500-29_marine_group
Otu0491	66	23	-1.09624	0.270774	0.82404	Myxococcota	Myxococcaceae	P3OB-42
Otu0496	88	96	1.16634	0.250952	0.82404	Actinobacteriota	Thermoleophilia_unclassified	Thermoleophilia_unclassified
Otu0514	129	94	1.23173	0.267181	0.82404	Planctomycetota	Gemmataceae	uncultured
Otu0535	60	166	1.11906	0.30859	0.82404	Acidobacteriota	Blastocatellaceae	Blastocatella
Otu0672	17	35	0.839779	0.307133	0.82404	Bacteroidota	Cytophagales_unclassified	Cytophagales_unclassified
Otu1036	82	9	-1.03541	0.305483	0.82404	Proteobacteria	Chitinimonadaceae	Chitinivorax
Otu0047	6013	18208	1.06087	0.32023	0.828322	Firmicutes	Lactobacillaceae	Lactobacillus
Otu0066	3655	6761	-1.32124	0.31906	0.828322	Proteobacteria	Alteromonadaceae	Alteromonadaceae_unclassified
Otu0274	114	207	0.83647	0.322246	0.828322	Proteobacteria	SM2D12	SM2D12_ge
Otu0022	2309	3037	-0.951786	0.326045	0.831765	Campilobacterota	Campylobacteraceae	Campylobacter
Otu0486	318	288	1.11187	0.327928	0.831765	Actinobacteriota	Propionibacteriaceae	Friedmanniella
Otu0234	470	1487	1.03639	0.333438	0.840177	Proteobacteria	Caulobacteraceae	Caulobacter
Otu0115	8249	728	-1.43241	0.33746	0.844754	Proteobacteria	Vibrionaceae	Vibrio
Otu0055	1617	7271	1.00838	0.350146	0.84906	Firmicutes	Lachnospiraceae	Lachnospiraceae_unclassified
Otu0056	5435	6687	-1.29188	0.341923	0.84906	Firmicutes	Bacillaceae	Bacillus
Otu0077	1053	26049	1.33323	0.348407	0.84906	Proteobacteria	Oxalobacteraceae	Massilia
Otu0304	196	416	0.895083	0.350265	0.84906	Proteobacteria	Comamonadaceae	Ottowia
Otu0586	47	53	0.719082	0.350104	0.84906	Verrucomicrobiota	Chlamydiaceae	Chlamydiaceae_unclassified
Otu0696	50	51	0.764197	0.365336	0.880024	Proteobacteria	Aeromonadaceae	Aeromonadaceae_unclassified
Otu0024	16788	31887	0.588811	0.376548	0.890233	Actinobacteriota	Actinobacteria_unclassified	Actinobacteria_unclassified
Otu0404	271	106	-0.925379	0.372643	0.890233	Proteobacteria	Rhodocyclaceae	Zoogloea
Otu0418	484	187	-0.945323	0.374483	0.890233	Actinobacteriota	Micrococcaceae	Arthrobacter
Otu0043	2602	526	-1.10398	0.384707	0.898432	Bacteroidota	Porphyromonadaceae	Porphyromonas
Otu0604	39	269	1.07229	0.38427	0.898432	Planctomycetota	Rubinisphaeraceae	SH-PL14
Otu0147	828	733	-1.21563	0.391294	0.902805	Firmicutes	Peptostreptococcales-Tissierellales_fa	Parvimonas
Otu0206	504	330	-0.922698	0.389004	0.902805	Proteobacteria	Pasteurellaceae	Aggregatibacter
Otu0151	629	1173	0.743576	0.399188	0.914798	Actinobacteriota	uncultured_fa	uncultured_ge
Otu0306	115	617	0.940803	0.402159	0.914798	Spirochaetota	Spirochaetaceae	Spirochaetaceae_unclassified
Otu0353	106	233	0.803633	0.403658	0.914798	Planctomycetota	Gemmataceae	Gemmataceae_unclassified
Otu0692	25	40	0.825192	0.415166	0.935345	Spirochaetota	Spirochaetota_unclassified	Spirochaetota_unclassified
Otu0038	23961	20434	-0.735026	0.419685	0.936314	Proteobacteria	Moraxellaceae	Psychrobacter
Otu0108	1033	848	-1.00936	0.420486	0.936314	Proteobacteria	Marinomonadaceae	Marinomonas
Otu0011	109585	27046	-0.825955	0.426871	0.938612	Bacteroidota	Prevotellaceae	Prevotella
Otu0118	477	1409	0.900513	0.42887	0.938612	Proteobacteria	Xanthomonadaceae	Xanthomonas
Otu0352	215	709	0.824862	0.427869	0.938612	Proteobacteria	Aquaspirillaceae	Aquaspirillum
Otu0006	62340	69023	1.05136	0.467505	0.94158	Firmicutes	Peptostreptococcales-Tissierellales_fa	Anaerococcus
Otu0067	1702	3455	-0.812127	0.471916	0.94158	Bacteroidota	Bacteroidia_unclassified	Bacteroidia_unclassified
Otu0068	4252	762	-0.980347	0.451354	0.94158	Firmicutes	Peptostreptococcales-Tissierellales_fa	Peptostreptococcales-Tissierellales_fa_unclassified
Otu0075	3301	1714	-0.718216	0.443041	0.94158	Firmicutes	Bacilli_unclassified	Bacilli_unclassified
Otu0090	1235	16510	0.950653	0.477215	0.94158	Proteobacteria	Rhodocyclaceae	Rhodocyclaceae_unclassified
Otu0130	893	2801	0.853986	0.471175	0.94158	Actinobacteriota	Micrococcaceae	Renibacterium
Otu0160	707	802	-0.765022	0.451498	0.94158	Bdellovibrionota	Bacteriovoracaceae	Peredibacter
Otu0166	1392	1352	0.643549	0.469165	0.94158	Actinobacteriota	Nocardioidaceae	Nocardioides
Otu0174	489	1420	0.788108	0.481584	0.94158	Proteobacteria	Burkholderiaceae	Burkholderiaceae_unclassified
Otu0209	704	344	-0.591136	0.481235	0.94158	Myxococcota	Myxococcaceae	uncultured
Otu0219	473	776	-0.696254	0.476876	0.94158	Dependentiae	Babeliales_unclassified	Babeliales_unclassified
Otu0231	203	366	0.675788	0.446953	0.94158	Patescibacteria	Parcubacteria_unclassified	Parcubacteria_unclassified
Otu0237	286	799	0.683918	0.481853	0.94158	Bacteroidota	Kapabacteriales_fa	Kapabacteriales_ge
Otu0240	278	270	0.607046	0.451767	0.94158	Myxococcota	Polyangiales_unclassified	Polyangiales_unclassified
Otu0254	562	372	-0.71611	0.454746	0.94158	Firmicutes	Carnobacteriaceae	Carnobacteriaceae_unclassified
Otu0258	170	501	0.780951	0.436431	0.94158	Proteobacteria	Oxalobacteraceae	Duganella
Otu0275	292	151	-0.540594	0.480021	0.94158	Bacteroidota	Sphingobacteriales_unclassified	Sphingobacteriales_unclassified
Otu0326	134	376	0.873443	0.461736	0.94158	Firmicutes	Lactobacillaceae	Lactobacillaceae_unclassified
Otu0401	174	78	-0.727532	0.476118	0.94158	Acidobacteriota	11-24_fa	11-24_ge
Otu0412	875	158	-0.891806	0.445323	0.94158	Actinobacteriota	Micrococcaceae	Glutamicibacter
Otu0948	12	37	0.653212	0.44347	0.94158	Proteobacteria	Azospirillales_unclassified	Azospirillales_unclassified
Otu0001	5879	38806	0.774252	0.490898	0.944794	Proteobacteria	Enterobacteriaceae	Enterobacteriaceae_unclassified
Otu0142	658	1781	0.688058	0.489398	0.944794	Spirochaetota	Leptospiraceae	Turneriella
Otu0152	231	925	0.783001	0.486193	0.944794	Firmicutes	Clostridiaceae	Clostridiaceae_unclassified
Otu0013	29656	67075	-0.722813	0.521755	0.94907	Proteobacteria	Alteromonadaceae	Rheinheimera
Otu0032	34444	15889	-0.686919	0.540418	0.94907	Proteobacteria	Gammaproteobacteria_unclassified	Gammaproteobacteria_unclassified
Otu0049	6791	23907	0.726108	0.509886	0.94907	Firmicutes	Peptostreptococcales-Tissierellales_fa	Finegoldia
Otu0059	2217	7410	0.86718	0.525526	0.94907	Firmicutes	Leuconostocaceae	Leuconostoc
Otu0070	1763	9288	0.647413	0.543184	0.94907	Bacteroidota	Weeksellaceae	Weeksellaceae_unclassified
Otu0073	2590	4064	-0.578253	0.552029	0.94907	Proteobacteria	Comamonadaceae	Limnohabitans
Otu0078	2063	1614	-0.950895	0.517821	0.94907	Firmicutes	Veillonellaceae	Veillonellaceae_unclassified
Otu0083	825	1408	-0.744344	0.509619	0.94907	Proteobacteria	Proteobacteria_unclassified	Proteobacteria_unclassified
Otu0085	17629	828	0.907188	0.541703	0.94907	Proteobacteria	Vibrionaceae	Vibrionaceae_unclassified
Otu0088	708	17873	0.810207	0.541177	0.94907	Proteobacteria	Mitochondria	Mitochondria_ge
Otu0123	656	2448	0.64955	0.55507	0.94907	Proteobacteria	Legionellaceae	Legionella
Otu0156	1727	383	-0.734747	0.522369	0.94907	Actinobacteriota	Corynebacteriaceae	Lawsonella
Otu0172	198	428	0.556239	0.550663	0.94907	Firmicutes	Aerococcaceae	Aerococcaceae_unclassified
Otu0180	262	1528	0.888342	0.51179	0.94907	Bacteroidota	Muribaculaceae	Muribaculaceae_ge
Otu0235	357	262	0.757183	0.511346	0.94907	Firmicutes	Exiguobacteraceae	Exiguobacterium
Otu0253	232	702	0.613052	0.554588	0.94907	Proteobacteria	Sphingomonadaceae	Novosphingobium
Otu0256	113	542	0.741052	0.520487	0.94907	Proteobacteria	Rhizobiales_Incertae_Sedis	uncultured
Otu0269	244	639	0.622681	0.52355	0.94907	Proteobacteria	Rhodobacteraceae	Rubellimicrobium
Otu0369	295	372	0.637762	0.501157	0.94907	Chloroflexi	KD4-96_fa	KD4-96_ge
Otu0460	72	69	-0.55257	0.546961	0.94907	Proteobacteria	Erwiniaceae	Erwiniaceae_unclassified
Otu0480	54	98	0.520288	0.533065	0.94907	Firmicutes	Veillonellales-Selenomonadales_unclassified	Veillonellales-Selenomonadales_unclassified
Otu0487	112	82	-0.611426	0.51034	0.94907	Myxococcota	Polyangiaceae	Pajaroellobacter
Otu0550	93	224	0.560374	0.542885	0.94907	Actinobacteriota	Corynebacteriaceae	Corynebacteriaceae_ge
Otu0635	131	55	-0.69643	0.545165	0.94907	Actinobacteriota	Microbacteriaceae	Candidatus_Aquiluna
Otu0746	17	25	0.484138	0.512003	0.94907	Verrucomicrobiota	Verrucomicrobiota_unclassified	Verrucomicrobiota_unclassified
Otu0188	520	546	-0.54121	0.56193	0.95653	Proteobacteria	Burkholderiaceae	Lautropia
Otu0008	8044	27041	0.554281	0.576504	0.956916	Proteobacteria	Enterobacterales_unclassified	Enterobacterales_unclassified
Otu0016	23724	95284	0.646798	0.566154	0.956916	Firmicutes	Streptococcaceae	Lactococcus
Otu0064	4883	7851	-0.522455	0.585801	0.956916	Firmicutes	Carnobacteriaceae	Granulicatella
Otu0134	759	2519	0.569607	0.599634	0.956916	Firmicutes	Aerococcaceae	Facklamia
Otu0137	1027	1783	0.544349	0.597954	0.956916	Proteobacteria	Aeromonadaceae	Aeromonas
Otu0155	619	2042	0.553975	0.589499	0.956916	Proteobacteria	Caulobacteraceae	Caulobacteraceae_unclassified
Otu0165	1132	971	-0.463231	0.567285	0.956916	Actinobacteriota	Propionibacteriaceae	Propionibacteriaceae_unclassified
Otu0176	169	411	0.523828	0.583979	0.956916	Firmicutes	Hungateiclostridiaceae	Hungateiclostridiaceae_unclassified
Otu0264	85	198	0.52458	0.58877	0.956916	Firmicutes	Planococcaceae	Planococcaceae_unclassified
Otu0277	529	574	-0.518688	0.587192	0.956916	Actinobacteriota	Dermabacteraceae	Dermabacteraceae_unclassified
Otu0289	233	751	0.54438	0.596474	0.956916	Proteobacteria	Azospirillaceae	Azospirillaceae_unclassified
Otu0333	143	277	0.477731	0.572876	0.956916	Chloroflexi	Chloroflexi_unclassified	Chloroflexi_unclassified
Otu0399	200	354	0.528584	0.599269	0.956916	Bacteroidota	Hymenobacteraceae	Hymenobacter
Otu0492	99	192	-0.500187	0.59634	0.956916	Actinobacteriota	Micrococcaceae	Paenarthrobacter
Otu0511	56	115	0.571377	0.576932	0.956916	Proteobacteria	Rhodobacteraceae	Rhodobacter
Otu0246	302	323	0.340886	0.60407	0.959995	Firmicutes	Staphylococcaceae	Staphylococcaceae_unclassified
Otu0010	86261	15616	-0.438509	0.696599	0.964048	Bacteroidota	Prevotellaceae	Prevotellaceae_unclassified
Otu0039	11386	15410	-0.329919	0.699753	0.964048	Actinobacteriota	Actinomycetaceae	Actinomyces
Otu0040	4418	8384	0.357928	0.66517	0.964048	Firmicutes	Streptococcaceae	Streptococcaceae_unclassified
Otu0051	4833	6779	-0.355477	0.67674	0.964048	Proteobacteria	Rhodobacteraceae	Rhodobacteraceae_unclassified
Otu0061	2772	7233	0.407814	0.671939	0.964048	Proteobacteria	Alphaproteobacteria_unclassified	Alphaproteobacteria_unclassified
Otu0065	715	710	-0.488665	0.687638	0.964048	Firmicutes	Peptostreptococcales-Tissierellales_unclassified	Peptostreptococcales-Tissierellales_unclassified
Otu0074	3723	7526	0.635567	0.623416	0.964048	Proteobacteria	Burkholderiaceae	Cupriavidus
Otu0076	2129	4604	0.381996	0.698435	0.964048	Firmicutes	Gemellaceae	Gemella
Otu0097	1862	3944	-0.413146	0.688978	0.964048	Proteobacteria	Comamonadaceae	Aquabacterium
Otu0109	1085	3350	0.422064	0.671784	0.964048	Proteobacteria	Beijerinckiaceae	Methylobacterium-Methylorubrum
Otu0133	805	2975	0.470004	0.678178	0.964048	Proteobacteria	Caulobacteraceae	Brevundimonas
Otu0138	1692	2154	0.478461	0.612123	0.964048	Proteobacteria	Neisseriaceae	Neisseriaceae_unclassified
Otu0148	565	638	0.289794	0.674521	0.964048	Firmicutes	Firmicutes_unclassified	Firmicutes_unclassified
Otu0149	677	958	-0.40129	0.695384	0.964048	Proteobacteria	Rhodobacteraceae	Pseudorhodobacter
Otu0175	151	302	0.454483	0.668338	0.964048	Firmicutes	Enterococcaceae	Enterococcaceae_unclassified
Otu0179	945	2039	0.580892	0.627291	0.964048	Deinococcota	Deinococcaceae	Deinococcus
Otu0182	366	707	0.397393	0.67498	0.964048	Chloroflexi	A4b	A4b_ge
Otu0183	366	680	0.350846	0.684133	0.964048	Actinobacteriota	Acidimicrobiia_unclassified	Acidimicrobiia_unclassified
Otu0189	442	1364	-0.559674	0.659696	0.964048	Proteobacteria	Rhizobiaceae	Allorhizobium-Neorhizobium-Pararhizobium-Rhizobium
Otu0201	488	1103	0.353998	0.693999	0.964048	Bacteroidota	Flavobacteriaceae	Capnocytophaga
Otu0202	389	686	0.348834	0.687136	0.964048	Chloroflexi	Anaerolineae_unclassified	Anaerolineae_unclassified
Otu0214	254	437	0.513264	0.638438	0.964048	Bacteroidota	AKYH767	AKYH767_ge
Otu0310	199	215	0.355247	0.636867	0.964048	Proteobacteria	Methylophilaceae	Methylotenera
Otu0329	192	230	0.500011	0.678172	0.964048	Myxococcota	Myxococcaceae	Myxococcaceae_unclassified
Otu0340	162	346	0.456862	0.650128	0.964048	Actinobacteriota	Pseudonocardiaceae	Pseudonocardiaceae_unclassified
Otu0372	88	108	-0.458812	0.651633	0.964048	Patescibacteria	LWQ8	LWQ8_ge
Otu0407	23	17	-0.40195	0.634142	0.964048	Campilobacterota	Campylobacterales_unclassified	Campylobacterales_unclassified
Otu0448	438	64	0.580343	0.63437	0.964048	Actinobacteriota	Dermabacteraceae	Brachybacterium
Otu0485	96	123	-0.361534	0.647073	0.964048	Acidobacteriota	Blastocatellaceae	Blastocatellaceae_unclassified
Otu0497	76	127	0.34556	0.687702	0.964048	Bdellovibrionota	Oligoflexia_unclassified	Oligoflexia_unclassified
Otu0538	47	52	0.394038	0.67181	0.964048	Campilobacterota	Arcobacteraceae	Pseudarcobacter
Otu0549	109	201	-0.420988	0.680092	0.964048	Proteobacteria	Nitrosomonadaceae	Nitrosomonadaceae_unclassified
Otu0699	5	10	0.378336	0.625079	0.964048	Bacteroidota	Prevotellaceae	Prevotellaceae_NK3B31_group
Otu0704	54	60	0.458971	0.656386	0.964048	Actinobacteriota	Microtrichaceae	uncultured
Otu0747	29	23	0.4153	0.658075	0.964048	Cyanobacteria	Cyanobacteria_unclassified	Cyanobacteria_unclassified
Otu0756	38	47	0.353832	0.643775	0.964048	Proteobacteria	Pseudomonadales_unclassified	Pseudomonadales_unclassified
Otu0841	61	77	-0.472973	0.648421	0.964048	Actinobacteriota	Microbacteriaceae	Cryobacterium
Otu0031	9560	15112	0.307406	0.735934	0.965485	Bacteria_unclassified	Bacteria_unclassified	Bacteria_unclassified
Otu0046	2119	2622	-0.407994	0.720509	0.965485	Firmicutes	Enterococcaceae	Enterococcus
Otu0071	4843	5111	-0.34875	0.71321	0.965485	Actinobacteriota	Corynebacteriaceae	Corynebacteriaceae_unclassified
Otu0094	1510	3226	-0.388144	0.720351	0.965485	Bdellovibrionota	0319-6G20_fa	0319-6G20_ge
Otu0121	1809	2299	-0.350279	0.721563	0.965485	Actinobacteriota	Actinomycetaceae	Actinomycetaceae_unclassified
Otu0161	956	1910	0.453368	0.715958	0.965485	Bacteroidota	Prevotellaceae	Alloprevotella
Otu0192	726	899	-0.356043	0.728582	0.965485	Actinobacteriota	Nocardiaceae	Rhodococcus
Otu0212	241	775	0.322593	0.730588	0.965485	Actinobacteriota	Microtrichales_unclassified	Microtrichales_unclassified
Otu0222	315	332	-0.340361	0.704913	0.965485	Actinobacteriota	Frankiales_unclassified	Frankiales_unclassified
Otu0242	470	165	-0.39084	0.720063	0.965485	Firmicutes	Paenibacillaceae	Paenibacillus
Otu0362	123	166	-0.329818	0.732645	0.965485	Acidobacteriota	Acidobacteriae_unclassified	Acidobacteriae_unclassified
Otu0367	166	171	0.359202	0.736087	0.965485	Proteobacteria	Comamonadaceae	Rhizobacter
Otu0379	86	121	0.333532	0.735274	0.965485	Proteobacteria	Burkholderiaceae	Burkholderia-Caballeronia-Paraburkholderia
Otu0727	5	10	0.241746	0.728899	0.965485	Acidobacteriota	Acidobacteriota_unclassified	Acidobacteriota_unclassified
Otu0195	668	434	0.287737	0.740579	0.967622	Proteobacteria	Methylophilaceae	Methylophilaceae_unclassified
Otu0423	74	44	-0.336667	0.74277	0.967622	Proteobacteria	Sphingomonadaceae	Polymorphobacter
Otu0025	21148	27700	-0.258124	0.758955	0.978205	Actinobacteriota	Micrococcaceae	Rothia
Otu0057	5576	8221	-0.267275	0.766483	0.978205	Actinobacteriota	Corynebacteriaceae	Turicella
Otu0082	4121	6541	-0.280704	0.768772	0.978205	Actinobacteriota	Micrococcaceae	Micrococcaceae_unclassified
Otu0194	321	614	0.278886	0.766625	0.978205	Bacteroidota	Paludibacteraceae	Paludibacter
Otu0198	631	1016	0.246603	0.765499	0.978205	Acidobacteriota	Vicinamibacteraceae	Vicinamibacteraceae_ge
Otu0241	230	265	-0.361586	0.753839	0.978205	Actinobacteriota	Geodermatophilaceae	Blastococcus
Otu0414	85	125	-0.264134	0.760526	0.978205	Actinobacteriota	Nocardiaceae	Nocardiaceae_unclassified
Otu0002	1878	44834	0.518383	0.784621	0.980329	Proteobacteria	Enterobacteriaceae	Escherichia-Shigella
Otu0028	11118	23094	0.372646	0.775943	0.980329	Proteobacteria	Alteromonadales_unclassified	Alteromonadales_unclassified
Otu0048	2164	5971	0.273011	0.793852	0.980329	Proteobacteria	Rhizobiales_unclassified	Rhizobiales_unclassified
Otu0080	2577	6349	0.234889	0.798597	0.980329	Bacteroidota	Weeksellaceae	Cloacibacterium
Otu0096	2130	3315	-0.290237	0.796531	0.980329	Proteobacteria	Comamonadaceae	Paucibacter
Otu0100	1192	2633	0.282505	0.790254	0.980329	Bdellovibrionota	Bdellovibrionaceae	Bdellovibrio
Otu0104	1285	1839	-0.282771	0.779465	0.980329	Proteobacteria	Cellvibrionaceae	Cellvibrio
Otu0114	1672	2322	-0.25911	0.798298	0.980329	Firmicutes	Peptostreptococcales-Tissierellales_fa	Helcococcus
Otu0117	1220	1159	-0.219845	0.796309	0.980329	Firmicutes	Clostridia_unclassified	Clostridia_unclassified
Otu0144	163	544	0.29131	0.786773	0.980329	Firmicutes	Oscillospirales_unclassified	Oscillospirales_unclassified
Otu0158	1570	2017	0.291941	0.797838	0.980329	Proteobacteria	Comamonadaceae	Tepidimonas
Otu0357	75	185	0.270685	0.801603	0.980876	Proteobacteria	Moraxellaceae	Alkanindiges
Otu0173	662	1080	-0.26289	0.805641	0.981505	Patescibacteria	Saccharimonadaceae	Saccharimonadaceae_unclassified
Otu0233	1091	359	-0.215743	0.807243	0.981505	Bacteroidota	Sphingobacteriaceae	Sphingobacteriaceae_unclassified
Otu0037	12406	29234	0.204768	0.817321	0.982476	Proteobacteria	Moraxellaceae	Moraxella
Otu0396	82	193	-0.207769	0.816809	0.982476	Bdellovibrionota	Bdellovibrionota_unclassified	Bdellovibrionota_unclassified
Otu0612	62	54	-0.191275	0.818303	0.982476	Chloroflexi	A4b	A4b_unclassified
Otu0626	42	116	0.212522	0.815188	0.982476	Proteobacteria	Sphingomonadaceae	Ellin6055
Otu0003	126053	204115	0.15852	0.853131	0.984408	Firmicutes	Streptococcaceae	Streptococcus
Otu0005	68555	105198	-0.0246012	0.976698	0.984408	Firmicutes	Staphylococcaceae	Staphylococcus
Otu0012	28849	84115	0.0685372	0.946283	0.984408	Proteobacteria	Comamonadaceae	Comamonadaceae_unclassified
Otu0014	3181	8504	-0.0326043	0.975307	0.984408	Proteobacteria	Enterobacteriaceae	Klebsiella
Otu0017	26981	33038	-0.214203	0.824915	0.984408	Actinobacteriota	Propionibacteriaceae	Cutibacterium
Otu0018	21028	33545	-0.117791	0.88918	0.984408	Firmicutes	Veillonellaceae	Veillonella
Otu0020	25880	43216	-0.215993	0.843399	0.984408	Actinobacteriota	Corynebacteriaceae	Corynebacterium
Otu0021	19689	55337	-0.0455993	0.961985	0.984408	Proteobacteria	Moraxellaceae	Acinetobacter
Otu0027	14258	46860	-0.051304	0.955976	0.984408	Proteobacteria	Pseudomonadaceae	Pseudomonas
Otu0029	12259	27121	-0.0334816	0.970199	0.984408	Proteobacteria	Burkholderiales_unclassified	Burkholderiales_unclassified
Otu0033	11409	23619	0.0315705	0.974273	0.984408	Actinobacteriota	Microbacteriaceae	Microbacteriaceae_unclassified
Otu0034	11768	30532	-0.190335	0.841445	0.984408	Proteobacteria	Moraxellaceae	Moraxellaceae_unclassified
Otu0036	10657	13977	-0.241347	0.844136	0.984408	Cyanobacteria	Cyanobacteriia_unclassified	Cyanobacteriia_unclassified
Otu0042	5259	7702	-0.127907	0.894101	0.984408	Firmicutes	Lactobacillales_unclassified	Lactobacillales_unclassified
Otu0044	7071	30589	0.0739425	0.952073	0.984408	Proteobacteria	Oxalobacteraceae	Oxalobacteraceae_unclassified
Otu0045	10156	28567	0.181504	0.894082	0.984408	Proteobacteria	Burkholderiaceae	Ralstonia
Otu0050	8953	4216	-0.202827	0.87293	0.984408	Firmicutes	Peptostreptococcales-Tissierellales_fa	Peptoniphilus
Otu0052	7673	12847	-0.117545	0.901037	0.984408	Actinobacteriota	Micrococcales_unclassified	Micrococcales_unclassified
Otu0053	5865	14731	0.101293	0.927795	0.984408	Proteobacteria	Comamonadaceae	Pelomonas
Otu0062	1517	3507	-0.034953	0.973392	0.984408	Proteobacteria	Rhizobiaceae	Rhizobiaceae_unclassified
Otu0079	2801	5870	0.0764433	0.930446	0.984408	Proteobacteria	Moraxellaceae	Enhydrobacter
Otu0086	4139	3386	0.110974	0.922992	0.984408	Firmicutes	Listeriaceae	Brochothrix
Otu0087	3197	4277	-0.175379	0.848081	0.984408	Proteobacteria	Pasteurellaceae	Pasteurellaceae_unclassified
Otu0089	1623	2661	0.13005	0.915224	0.984408	Patescibacteria	Saccharimonadales_unclassified	Saccharimonadales_unclassified
Otu0093	3604	4095	-0.145394	0.88559	0.984408	Proteobacteria	Pasteurellaceae	Haemophilus
Otu0095	1418	3223	0.0484542	0.962641	0.984408	Proteobacteria	Burkholderiaceae	Polynucleobacter
Otu0099	1606	1705	0.0744841	0.924949	0.984408	Actinobacteriota	Micrococcaceae	Micrococcus
Otu0101	1283	1842	-0.153033	0.878611	0.984408	Fusobacteriota	Fusobacteriaceae	Fusobacterium
Otu0105	2007	3031	0.028288	0.976697	0.984408	Actinobacteriota	Micrococcaceae	Kocuria
Otu0107	1066	3249	-0.254448	0.829044	0.984408	Proteobacteria	Comamonadaceae	Rhodoferax
Otu0111	1049	627	-0.0997663	0.921993	0.984408	Bacteroidota	Bacteroidales_unclassified	Bacteroidales_unclassified
Otu0119	128	329	0.221283	0.840658	0.984408	Proteobacteria	Shewanellaceae	Shewanella
Otu0120	2039	3150	0.0976546	0.914669	0.984408	Proteobacteria	Neisseriaceae	Neisseria
Otu0125	1806	1785	-0.140458	0.872915	0.984408	Actinobacteriota	Bifidobacteriaceae	Gardnerella
Otu0126	1302	3555	0.0773831	0.937456	0.984408	Proteobacteria	Pseudomonadaceae	Pseudomonadaceae_unclassified
Otu0127	489	817	-0.100961	0.913955	0.984408	Proteobacteria	Rhodobacteraceae	Paracoccus
Otu0132	1081	1812	0.114966	0.895893	0.984408	Actinobacteriota	Corynebacteriales_unclassified	Corynebacteriales_unclassified
Otu0139	1245	1065	0.105462	0.927449	0.984408	Actinobacteriota	Atopobiaceae	Atopobium
Otu0140	1099	1343	0.124312	0.90528	0.984408	Proteobacteria	Comamonadaceae	Diaphorobacter
Otu0145	767	1518	-0.0473051	0.953815	0.984408	Actinobacteriota	Dermabacteraceae	Dermabacter
Otu0163	770	854	-0.215492	0.831138	0.984408	Actinobacteriota	Microbacteriaceae	Microbacterium
Otu0186	403	1606	-0.0679049	0.960637	0.984408	Proteobacteria	Chromobacteriaceae	Chromobacteriaceae_unclassified
Otu0205	534	810	0.134805	0.894581	0.984408	Bacteroidota	Sphingobacteriaceae	Pedobacter
Otu0217	357	827	0.102266	0.914007	0.984408	Proteobacteria	Comamonadaceae	Acidovorax
Otu0220	329	418	-0.187682	0.848538	0.984408	Bacteroidota	Saprospiraceae	uncultured
Otu0230	360	1278	-0.0994423	0.946513	0.984408	Firmicutes	Selenomonadaceae	Selenomonadaceae_unclassified
Otu0263	182	237	0.0881935	0.922684	0.984408	Patescibacteria	Gracilibacteria_fa	Gracilibacteria_ge
Otu0273	278	652	-0.131423	0.906132	0.984408	Actinobacteriota	Nocardioidaceae	Marmoricola
Otu0309	222	192	0.0744115	0.936972	0.984408	Dependentiae	UBA12409	UBA12409_ge
Otu0324	916	417	0.227741	0.85761	0.984408	Firmicutes	Leuconostocaceae	Leuconostocaceae_unclassified
Otu0348	337	93	-0.131789	0.908768	0.984408	Actinobacteriota	Intrasporangiaceae	Intrasporangiaceae_unclassified
Otu0355	172	161	-0.14078	0.877713	0.984408	Actinobacteriota	uncultured	uncultured_ge
Otu0374	140	178	-0.0349207	0.96634	0.984408	Proteobacteria	Halieaceae	Halieaceae_unclassified
Otu0382	266	106	-0.0634019	0.954533	0.984408	Patescibacteria	Saccharimonadaceae	Saccharimonadaceae_ge
Otu0390	179	315	0.181273	0.852638	0.984408	Actinobacteriota	Gaiellaceae	Gaiella
Otu0402	114	132	-0.0767946	0.946839	0.984408	Proteobacteria	Hyphomonadaceae	Hyphomonas
Otu0411	99	233	0.0422928	0.962279	0.984408	Bacteroidota	Chitinophagaceae	Chitinophagaceae_unclassified
Otu0434	258	136	-0.175199	0.852737	0.984408	Actinobacteriota	Propionibacteriales_unclassified	Propionibacteriales_unclassified
Otu0444	115	238	0.0459314	0.968854	0.984408	Patescibacteria	JGI_0000069-P22_fa	JGI_0000069-P22_ge
Otu0447	57	76	-0.0901526	0.90899	0.984408	Bacteroidota	Flavobacteriales_unclassified	Flavobacteriales_unclassified
Otu0605	5	9	0.0972373	0.910325	0.984408	Proteobacteria	Enterobacteriaceae	Enterobacter
Otu0072	2640	5449	0.0135664	0.990594	0.994841	Actinobacteriota	Microbacteriaceae	Rhodoluna
Otu0236	284	1641	0.00714433	0.994841	0.994841	Nitrospirota	Nitrospiraceae	Nitrospira
Otu0291	404	900	-0.00704873	0.994441	0.994841	Proteobacteria	Neisseriaceae	Kingella

## Sheet: urine samples
Supplementary Table 3: Low-grade tumors sex-related differences in urine samples
						Taxonomic level
OTU	counts in male group	counts in female group	fold change	pvalues	adjPvalues	Phylum	Family	Genus
Otu0175	49	593	4.7337	0.000602834	0.116585	Firmicutes	Enterococcaceae	Enterococcaceae_unclassified
Otu0252	28	459	3.68291	0.00126664	0.116585	Proteobacteria	A0839	A0839_ge
Otu0309	9	350	3.85306	0.00130021	0.116585	Dependentiae	UBA12409	UBA12409_ge
Otu0128	210	719	3.8875	0.00440864	0.18001	Proteobacteria	Acetobacteraceae	Acetobacteraceae_unclassified
Otu0233	42	352	3.49984	0.00303972	0.18001	Bacteroidota	Sphingobacteriaceae	Sphingobacteriaceae_unclassified
Otu0251	111	2640	3.54677	0.00468427	0.18001	Firmicutes	Ruminococcaceae	Ruminococcaceae_unclassified
Otu0264	92	1728	3.88763	0.0040988	0.18001	Firmicutes	Planococcaceae	Planococcaceae_unclassified
Otu0129	106	998	3.04384	0.0063167	0.212399	Proteobacteria	Xanthomonadaceae	Stenotrophomonas
Otu0270	94	1679	4.23218	0.00842188	0.251721	Actinobacteriota	Dietziaceae	Dietzia
Otu0303	5	436	3.31909	0.0115615	0.311005	Proteobacteria	Hyphomicrobiaceae	Hyphomicrobium
Otu0025	1196	3803	2.41271	0.0232908	0.328622	Actinobacteriota	Micrococcaceae	Rothia
Otu0047	2541	11827	3.00425	0.0312796	0.328622	Firmicutes	Lactobacillaceae	Lactobacillus
Otu0052	2494	6693	1.9989	0.0317627	0.328622	Actinobacteriota	Micrococcales_unclassified	Micrococcales_unclassified
Otu0090	333	502	2.51562	0.0313793	0.328622	Proteobacteria	Rhodocyclaceae	Rhodocyclaceae_unclassified
Otu0093	559	192	-2.43512	0.0187525	0.328622	Proteobacteria	Pasteurellaceae	Haemophilus
Otu0112	470	1620	2.37106	0.0205264	0.328622	Firmicutes	Bacillaceae	Bacillaceae_unclassified
Otu0159	160	431	2.29244	0.0208391	0.328622	Bacteroidota	Weeksellaceae	Chryseobacterium
Otu0204	1017	2289	2.61887	0.0298493	0.328622	Proteobacteria	Psychromonadaceae	Psychromonas
Otu0219	26	355	2.65186	0.0244636	0.328622	Dependentiae	Babeliales_unclassified	Babeliales_unclassified
Otu0225	39	355	2.74897	0.0215781	0.328622	Proteobacteria	Rhodocyclaceae	C39
Otu0229	90	434	2.61439	0.0279431	0.328622	Actinobacteriota	Iamiaceae	Iamia
Otu0242	72	1093	3.38593	0.0210801	0.328622	Firmicutes	Paenibacillaceae	Paenibacillus
Otu0271	27	264	2.81626	0.024859	0.328622	Proteobacteria	Methylophilaceae	Methylophilus
Otu0275	115	339	2.5783	0.0264535	0.328622	Bacteroidota	Sphingobacteriales_unclassified	Sphingobacteriales_unclassified
Otu0345	211	714	3.12376	0.0170524	0.328622	Proteobacteria	uncultured	uncultured_ge
Otu0388	33	223	2.8386	0.0167761	0.328622	Actinobacteriota	PeM15_fa	PeM15_ge
Otu0214	105	330	2.36156	0.037617	0.374777	Bacteroidota	AKYH767	AKYH767_ge
Otu0144	253	807	1.89801	0.0478515	0.399437	Firmicutes	Oscillospirales_unclassified	Oscillospirales_unclassified
Otu0215	24	418	2.17971	0.0490016	0.399437	Actinobacteriota	Nocardioidaceae	Nocardioidaceae_unclassified
Otu0313	32	81	2.29833	0.0460587	0.399437	Proteobacteria	Comamonadaceae	Variovorax
Otu0337	38	144	2.49864	0.0479623	0.399437	Bacteroidota	uncultured	uncultured_ge
Otu0461	242	458	2.58172	0.0417024	0.399437	Actinobacteriota	Dermacoccaceae	Dermacoccus
Otu0538	36	79	2.40161	0.0448856	0.399437	Campilobacterota	Arcobacteraceae	Pseudarcobacter
Otu0070	276	657	1.99988	0.0534165	0.399723	Bacteroidota	Weeksellaceae	Weeksellaceae_unclassified
Otu0094	539	1062	1.77542	0.0523826	0.399723	Bdellovibrionota	0319-6G20_fa	0319-6G20_ge
Otu0274	218	709	2.21183	0.0549805	0.399723	Proteobacteria	SM2D12	SM2D12_ge
Otu0335	156	386	2.49256	0.0544981	0.399723	Proteobacteria	Hyphomonadaceae	SWB02
Otu0076	149	1050	1.95456	0.0662499	0.414447	Firmicutes	Gemellaceae	Gemella
Otu0084	12302	1403	-3.07594	0.0596182	0.414447	Firmicutes	Peptostreptococcales-Tissierellales_fa	Murdochiella
Otu0098	1311	3349	2.16712	0.0640255	0.414447	Patescibacteria	Saccharimonadales_fa	Saccharimonadales_ge
Otu0158	253	401	2.35912	0.0602999	0.414447	Proteobacteria	Comamonadaceae	Tepidimonas
Otu0167	1097	2354	2.17836	0.0625353	0.414447	Firmicutes	Ruminococcaceae	Faecalibacterium
Otu0393	340	108	-1.96131	0.0653334	0.414447	Firmicutes	Oscillospiraceae	Oscillospiraceae_unclassified
Otu0048	782	1412	1.73618	0.0848419	0.440686	Proteobacteria	Rhizobiales_unclassified	Rhizobiales_unclassified
Otu0054	2445	24942	2.48571	0.0831328	0.440686	Bacteroidota	Bacteroidaceae	Bacteroides
Otu0073	674	2148	2.34533	0.0851884	0.440686	Proteobacteria	Comamonadaceae	Limnohabitans
Otu0089	853	3435	2.09938	0.0779487	0.440686	Patescibacteria	Saccharimonadales_unclassified	Saccharimonadales_unclassified
Otu0183	159	437	1.35864	0.0821265	0.440686	Actinobacteriota	Acidimicrobiia_unclassified	Acidimicrobiia_unclassified
Otu0239	43	150	1.90731	0.0757768	0.440686	Verrucomicrobiota	Chlamydiales_unclassified	Chlamydiales_unclassified
Otu0244	237	828	2.00787	0.0781254	0.440686	Proteobacteria	Comamonadaceae	Malikia
Otu0334	278	863	2.17603	0.0839976	0.440686	Firmicutes	Lachnospiraceae	Fusicatenibacter
Otu0513	93	291	2.15384	0.0807783	0.440686	Firmicutes	Lachnospiraceae	Lachnospiraceae_ge
Otu0064	474	1612	2.14955	0.0994574	0.487631	Firmicutes	Carnobacteriaceae	Granulicatella
Otu0195	207	777	2.00613	0.0978548	0.487631	Proteobacteria	Methylophilaceae	Methylophilaceae_unclassified
Otu0284	244	835	1.73786	0.0997016	0.487631	Proteobacteria	Vibrionaceae	Photobacterium
Otu0095	439	1465	2.01723	0.119186	0.500953	Proteobacteria	Burkholderiaceae	Polynucleobacter
Otu0101	378	646	1.55654	0.111618	0.500953	Fusobacteriota	Fusobacteriaceae	Fusobacterium
Otu0194	229	549	1.51071	0.106837	0.500953	Bacteroidota	Paludibacteraceae	Paludibacter
Otu0224	159	313	1.66689	0.115497	0.500953	Actinobacteriota	Sporichthyaceae	Sporichthyaceae_unclassified
Otu0262	615	990	2.25192	0.109152	0.500953	Patescibacteria	Parcubacteria_fa	Parcubacteria_ge
Otu0306	33	9	-1.64573	0.113524	0.500953	Spirochaetota	Spirochaetaceae	Spirochaetaceae_unclassified
Otu0340	182	251	1.7936	0.1172	0.500953	Actinobacteriota	Pseudonocardiaceae	Pseudonocardiaceae_unclassified
Otu0392	92	12	-1.71681	0.118491	0.500953	Bacteroidota	Crocinitomicaceae	Crocinitomicaceae_unclassified
Otu0545	4	556	2.04209	0.115534	0.500953	Synergistota	Synergistaceae	Synergistaceae_unclassified
Otu0237	153	250	2.02296	0.12245	0.506753	Bacteroidota	Kapabacteriales_fa	Kapabacteriales_ge
Otu0123	203	847	1.86156	0.124639	0.507997	Proteobacteria	Legionellaceae	Legionella
Otu0265	147	403	1.56841	0.12857	0.516197	Actinobacteriota	Brevibacteriaceae	Brevibacterium
Otu0037	1079	2961	1.42688	0.147864	0.567455	Proteobacteria	Moraxellaceae	Moraxella
Otu0082	373	853	1.46908	0.145624	0.567455	Actinobacteriota	Micrococcaceae	Micrococcaceae_unclassified
Otu0203	548	1139	1.75906	0.149093	0.567455	Firmicutes	Lachnospiraceae	Blautia
Otu0294	288	793	1.55928	0.149774	0.567455	Firmicutes	Lachnospiraceae	Agathobacter
Otu0092	3261	1794	-2.45326	0.15488	0.572989	Proteobacteria	Enterobacteriaceae	Salmonella
Otu0414	21	535	1.8686	0.155495	0.572989	Actinobacteriota	Nocardiaceae	Nocardiaceae_unclassified
Otu0008	51458	113036	1.92232	0.163043	0.577087	Proteobacteria	Enterobacterales_unclassified	Enterobacterales_unclassified
Otu0109	89	341	1.5302	0.162537	0.577087	Proteobacteria	Beijerinckiaceae	Methylobacterium-Methylorubrum
Otu0196	964	192	-1.79646	0.16195	0.577087	Actinobacteriota	Actinomycetaceae	Mobiluncus
Otu0085	68	279	1.34341	0.165205	0.577146	Proteobacteria	Vibrionaceae	Vibrionaceae_unclassified
Otu0276	423	2111	1.95017	0.168706	0.581818	Firmicutes	Christensenellaceae	Christensenellaceae_R-7_group
Otu0342	30	157	1.58709	0.174649	0.594691	Proteobacteria	Sphingomonadaceae	Sphingorhabdus
Otu0126	158	318	1.23302	0.17867	0.598777	Proteobacteria	Pseudomonadaceae	Pseudomonadaceae_unclassified
Otu0394	271	685	1.66818	0.180301	0.598777	Firmicutes	Lachnospiraceae	Lachnospira
Otu0151	280	1568	1.45915	0.193352	0.634287	Actinobacteriota	uncultured_fa	uncultured_ge
Otu0018	2004	89126	2.26504	0.198942	0.644762	Firmicutes	Veillonellaceae	Veillonella
Otu0226	122	492	1.67389	0.205249	0.657287	Myxococcota	Haliangiaceae	Haliangium
Otu0396	73	324	1.26771	0.21045	0.666011	Bdellovibrionota	Bdellovibrionota_unclassified	Bdellovibrionota_unclassified
Otu0035	9634	55809	1.68086	0.231243	0.672925	Firmicutes	Veillonellaceae	Dialister
Otu0042	1744	2967	-1.18943	0.244667	0.672925	Firmicutes	Lactobacillales_unclassified	Lactobacillales_unclassified
Otu0062	409	815	1.29101	0.24213	0.672925	Proteobacteria	Rhizobiaceae	Rhizobiaceae_unclassified
Otu0110	754	1071	1.19574	0.238831	0.672925	Proteobacteria	Beijerinckiaceae	Beijerinckiaceae_unclassified
Otu0138	97	379	1.22211	0.225615	0.672925	Proteobacteria	Neisseriaceae	Neisseriaceae_unclassified
Otu0142	125	792	1.45487	0.235971	0.672925	Spirochaetota	Leptospiraceae	Turneriella
Otu0162	137	370	1.50145	0.245155	0.672925	Actinobacteriota	Microtrichaceae	IMCC26207
Otu0176	63	1187	1.86972	0.226114	0.672925	Firmicutes	Hungateiclostridiaceae	Hungateiclostridiaceae_unclassified
Otu0259	384	982	1.54987	0.242204	0.672925	Proteobacteria	Comamonadaceae	Polaromonas
Otu0300	108	38	-1.09244	0.223191	0.672925	Cyanobacteria	Cyanobacteriales_unclassified	Cyanobacteriales_unclassified
Otu0398	585	301	-1.37499	0.233032	0.672925	Firmicutes	Lachnospiraceae	Dorea
Otu0447	79	28	-1.22362	0.223856	0.672925	Bacteroidota	Flavobacteriales_unclassified	Flavobacteriales_unclassified
Otu0592	105	50	-1.30381	0.240963	0.672925	Proteobacteria	Enterobacteriaceae	Pluralibacter
Otu0087	348	679	1.13921	0.256712	0.690556	Proteobacteria	Pasteurellaceae	Pasteurellaceae_unclassified
Otu0150	116	482	1.25962	0.256044	0.690556	Proteobacteria	Neisseriaceae	uncultured
Otu0145	504	1627	1.40068	0.273029	0.72241	Actinobacteriota	Dermabacteraceae	Dermabacter
Otu0626	9	93	1.12616	0.273925	0.72241	Proteobacteria	Sphingomonadaceae	Ellin6055
Otu0134	260	1041	1.34247	0.281868	0.725831	Firmicutes	Aerococcaceae	Facklamia
Otu0170	326	583	1.20685	0.278151	0.725831	Firmicutes	Bacillales_unclassified	Bacillales_unclassified
Otu0281	140	213	1.32711	0.283317	0.725831	Patescibacteria	Saccharimonadaceae	TM7a
Otu0205	211	272	-1.2899	0.286112	0.726075	Bacteroidota	Sphingobacteriaceae	Pedobacter
Otu0254	36	107	1.24824	0.292289	0.727404	Firmicutes	Carnobacteriaceae	Carnobacteriaceae_unclassified
Otu0480	67	504	1.18775	0.290456	0.727404	Firmicutes	Veillonellales-Selenomonadales_unclassified	Veillonellales-Selenomonadales_unclassified
Otu0511	22	72	1.18066	0.294747	0.727404	Proteobacteria	Rhodobacteraceae	Rhodobacter
Otu0046	895	7420	1.57494	0.297743	0.728118	Firmicutes	Enterococcaceae	Enterococcus
Otu0022	18555	29506	-1.74539	0.305103	0.739394	Campilobacterota	Campylobacteraceae	Campylobacter
Otu0051	2957	3082	0.976044	0.321137	0.739839	Proteobacteria	Rhodobacteraceae	Rhodobacteraceae_unclassified
Otu0117	884	3877	1.00377	0.318494	0.739839	Firmicutes	Clostridia_unclassified	Clostridia_unclassified
Otu0118	1435	1499	1.37721	0.320401	0.739839	Proteobacteria	Xanthomonadaceae	Xanthomonas
Otu0131	174	1041	1.29967	0.311678	0.739839	Proteobacteria	Rickettsiales_unclassified	Rickettsiales_unclassified
Otu0209	94	387	1.25007	0.320099	0.739839	Myxococcota	Myxococcaceae	uncultured
Otu0377	45	137	1.19718	0.321789	0.739839	Campilobacterota	Arcobacteraceae	Arcobacteraceae_unclassified
Otu0172	3180	27	-1.2977	0.326378	0.744032	Firmicutes	Aerococcaceae	Aerococcaceae_unclassified
Otu0023	240	501	0.973443	0.337177	0.755839	Actinobacteriota	Bifidobacteriaceae	Bifidobacterium
Otu0206	39	94	-1.11108	0.335902	0.755839	Proteobacteria	Pasteurellaceae	Aggregatibacter
Otu0005	192862	147936	-1.37704	0.3707	0.770321	Firmicutes	Staphylococcaceae	Staphylococcus
Otu0026	763	72338	1.63211	0.37226	0.770321	Proteobacteria	Morganellaceae	Proteus
Otu0078	2808	7701	1.1846	0.37442	0.770321	Firmicutes	Veillonellaceae	Veillonellaceae_unclassified
Otu0120	197	388	0.988127	0.353239	0.770321	Proteobacteria	Neisseriaceae	Neisseria
Otu0127	386	303	1.18092	0.375104	0.770321	Proteobacteria	Rhodobacteraceae	Paracoccus
Otu0132	456	711	0.797016	0.347211	0.770321	Actinobacteriota	Corynebacteriales_unclassified	Corynebacteriales_unclassified
Otu0165	196	496	0.762615	0.367774	0.770321	Actinobacteriota	Propionibacteriaceae	Propionibacteriaceae_unclassified
Otu0173	261	826	1.01537	0.380865	0.770321	Patescibacteria	Saccharimonadaceae	Saccharimonadaceae_unclassified
Otu0199	173	1568	1.29811	0.377538	0.770321	Synergistota	Synergistaceae	Pyramidobacter
Otu0292	176	152	0.901236	0.374971	0.770321	Proteobacteria	Hyphomonadaceae	Hyphomonadaceae_unclassified
Otu0343	177	170	0.859531	0.378148	0.770321	Patescibacteria	Patescibacteria_unclassified	Patescibacteria_unclassified
Otu0434	95	23	-0.917823	0.368726	0.770321	Actinobacteriota	Propionibacteriales_unclassified	Propionibacteriales_unclassified
Otu0746	13	35	0.942871	0.365805	0.770321	Verrucomicrobiota	Verrucomicrobiota_unclassified	Verrucomicrobiota_unclassified
Otu0102	402	353	0.980952	0.389072	0.775566	Proteobacteria	Sphingomonadaceae	Sphingomonas
Otu0174	335	527	1.01589	0.389225	0.775566	Proteobacteria	Burkholderiaceae	Burkholderiaceae_unclassified
Otu0010	131235	113807	1.42657	0.414136	0.77904	Bacteroidota	Prevotellaceae	Prevotellaceae_unclassified
Otu0065	921	41371	1.23096	0.394061	0.77904	Firmicutes	Peptostreptococcales-Tissierellales_unclassified	Peptostreptococcales-Tissierellales_unclassified
Otu0097	176	285	0.909909	0.406346	0.77904	Proteobacteria	Comamonadaceae	Aquabacterium
Otu0249	42	306	0.890554	0.406109	0.77904	Bacteroidota	Bacteroidota_unclassified	Bacteroidota_unclassified
Otu0258	164	57	-0.897945	0.413788	0.77904	Proteobacteria	Oxalobacteraceae	Duganella
Otu0301	83	77	1.13202	0.400106	0.77904	Proteobacteria	Rhodobacteraceae	Tabrizicola
Otu0374	108	102	-0.973254	0.409256	0.77904	Proteobacteria	Halieaceae	Halieaceae_unclassified
Otu0676	228	176	-1.11043	0.407598	0.77904	Firmicutes	Negativicutes_unclassified	Negativicutes_unclassified
Otu0180	895	693	0.941785	0.421233	0.784469	Bacteroidota	Muribaculaceae	Muribaculaceae_ge
Otu0231	263	405	0.760939	0.425771	0.784469	Patescibacteria	Parcubacteria_unclassified	Parcubacteria_unclassified
Otu0367	111	69	-0.942625	0.423241	0.784469	Proteobacteria	Comamonadaceae	Rhizobacter
Otu0250	33	187	0.909964	0.431011	0.78872	Actinobacteriota	Ilumatobacteraceae	Ilumatobacteraceae_unclassified
Otu0021	3382	4991	-1.04446	0.438425	0.792972	Proteobacteria	Moraxellaceae	Acinetobacter
Otu0027	1582	7062	0.937514	0.442071	0.792972	Proteobacteria	Pseudomonadaceae	Pseudomonas
Otu0146	4162	704	-0.974823	0.442178	0.792972	Actinobacteriota	Actinomycetaceae	Varibaculum
Otu0024	11443	21776	-1.08291	0.454157	0.798484	Actinobacteriota	Actinobacteria_unclassified	Actinobacteria_unclassified
Otu0069	4291	34367	1.039	0.451527	0.798484	Firmicutes	Peptococcaceae	Peptococcus
Otu0121	129	537	0.665338	0.453343	0.798484	Actinobacteriota	Actinomycetaceae	Actinomycetaceae_unclassified
Otu0029	3892	7448	-0.891956	0.472663	0.803373	Proteobacteria	Burkholderiales_unclassified	Burkholderiales_unclassified
Otu0068	6761	10865	1.14182	0.466667	0.803373	Firmicutes	Peptostreptococcales-Tissierellales_fa	Peptostreptococcales-Tissierellales_fa_unclassified
Otu0105	780	1269	0.872048	0.470762	0.803373	Actinobacteriota	Micrococcaceae	Kocuria
Otu0107	498	1305	0.841808	0.472557	0.803373	Proteobacteria	Comamonadaceae	Rhodoferax
Otu0149	365	356	-0.750698	0.465574	0.803373	Proteobacteria	Rhodobacteraceae	Pseudorhodobacter
Otu0280	979	979	0.874076	0.474856	0.803373	Actinobacteriota	Coriobacteriaceae	Collinsella
Otu0192	75	208	0.778703	0.477886	0.803447	Actinobacteriota	Nocardiaceae	Rhodococcus
Otu0060	5805	36571	-1.27784	0.484492	0.804495	Firmicutes	Peptostreptococcales-Tissierellales_fa	Ezakiella
Otu0074	2278	3802	-0.900688	0.483769	0.804495	Proteobacteria	Burkholderiaceae	Cupriavidus
Otu0020	15180	25736	-0.877629	0.49777	0.816465	Actinobacteriota	Corynebacteriaceae	Corynebacterium
Otu0130	761	605	-0.868803	0.496107	0.816465	Actinobacteriota	Micrococcaceae	Renibacterium
Otu0053	2340	3736	0.678199	0.510937	0.827964	Proteobacteria	Comamonadaceae	Pelomonas
Otu0920	44	45	0.716847	0.50886	0.827964	Actinobacteriota	Coriobacteriaceae	Coriobacteriaceae_unclassified
Otu0043	8561	35338	0.983573	0.52431	0.839018	Bacteroidota	Porphyromonadaceae	Porphyromonas
Otu0086	18712	1658	0.798518	0.52271	0.839018	Firmicutes	Listeriaceae	Brochothrix
Otu0574	76	178	0.76877	0.527115	0.839018	Firmicutes	Lachnospiraceae	Coprococcus
Otu0232	1276	685	0.780403	0.532486	0.842581	Firmicutes	Ruminococcaceae	Subdoligranulum
Otu0212	305	537	0.661511	0.536982	0.844726	Actinobacteriota	Microtrichales_unclassified	Microtrichales_unclassified
Otu0075	728	816	-0.655652	0.546131	0.854124	Firmicutes	Bacilli_unclassified	Bacilli_unclassified
Otu0011	69455	45903	0.934604	0.563253	0.856018	Bacteroidota	Prevotellaceae	Prevotella
Otu0059	3314	2604	0.959235	0.553829	0.856018	Firmicutes	Leuconostocaceae	Leuconostoc
Otu0099	115	688	0.607915	0.562336	0.856018	Actinobacteriota	Micrococcaceae	Micrococcus
Otu0213	54	72	0.549274	0.556713	0.856018	Proteobacteria	Oxalobacteraceae	Undibacterium
Otu1011	10	10	-0.577938	0.558374	0.856018	Bacteroidota	Porphyromonadaceae	Porphyromonadaceae_unclassified
Otu0154	3409	1253	-0.884957	0.56749	0.857611	Firmicutes	Anaerovoracaceae	S5-A14a
Otu0006	31374	51062	-0.734322	0.600154	0.86606	Firmicutes	Peptostreptococcales-Tissierellales_fa	Anaerococcus
Otu0016	37032	3229	-0.839992	0.608807	0.86606	Firmicutes	Streptococcaceae	Lactococcus
Otu0056	2499	7350	-0.888525	0.593578	0.86606	Firmicutes	Bacillaceae	Bacillus
Otu0083	1528	7685	-0.582488	0.612637	0.86606	Proteobacteria	Proteobacteria_unclassified	Proteobacteria_unclassified
Otu0103	817	10597	0.927049	0.598857	0.86606	Proteobacteria	Morganellaceae	Morganellaceae_unclassified
Otu0104	472	1736	0.564535	0.60962	0.86606	Proteobacteria	Cellvibrionaceae	Cellvibrio
Otu0108	5157	3035	-0.707733	0.596957	0.86606	Proteobacteria	Marinomonadaceae	Marinomonas
Otu0133	250	245	-0.634991	0.600041	0.86606	Proteobacteria	Caulobacteraceae	Brevundimonas
Otu0155	346	721	-0.581251	0.614935	0.86606	Proteobacteria	Caulobacteraceae	Caulobacteraceae_unclassified
Otu0197	581	144	-0.642357	0.580084	0.86606	Patescibacteria	Candidatus_Peribacteria_fa	Candidatus_Peribacteria_ge
Otu0234	128	262	0.567047	0.60465	0.86606	Proteobacteria	Caulobacteraceae	Caulobacter
Otu0286	808	579	-0.573108	0.586036	0.86606	Proteobacteria	Moraxellaceae	Moraxellaceae_ge
Otu0507	106	66	-0.627521	0.592142	0.86606	Proteobacteria	Yersiniaceae	Yersinia
Otu0012	8944	12623	-0.637144	0.622101	0.867074	Proteobacteria	Comamonadaceae	Comamonadaceae_unclassified
Otu0055	6828	13430	0.557221	0.619437	0.867074	Firmicutes	Lachnospiraceae	Lachnospiraceae_unclassified
Otu0420	134	149	-0.567724	0.630049	0.873624	Proteobacteria	Oxalobacteraceae	Collimonas
Otu0002	92309	207060	-0.885197	0.694172	0.877313	Proteobacteria	Enterobacteriaceae	Escherichia-Shigella
Otu0014	14739	43995	-0.85805	0.662277	0.877313	Proteobacteria	Enterobacteriaceae	Klebsiella
Otu0033	6875	11169	0.413554	0.675839	0.877313	Actinobacteriota	Microbacteriaceae	Microbacteriaceae_unclassified
Otu0034	2391	3251	0.36112	0.706975	0.877313	Proteobacteria	Moraxellaceae	Moraxellaceae_unclassified
Otu0039	1890	4656	0.403734	0.704428	0.877313	Actinobacteriota	Actinomycetaceae	Actinomyces
Otu0045	2891	6589	-0.648368	0.658298	0.877313	Proteobacteria	Burkholderiaceae	Ralstonia
Otu0079	702	2576	0.486828	0.69523	0.877313	Proteobacteria	Moraxellaceae	Enhydrobacter
Otu0096	450	721	0.436346	0.691766	0.877313	Proteobacteria	Comamonadaceae	Paucibacter
Otu0100	1212	1467	0.415817	0.679052	0.877313	Bdellovibrionota	Bdellovibrionaceae	Bdellovibrio
Otu0137	117	201	-0.412058	0.715131	0.877313	Proteobacteria	Aeromonadaceae	Aeromonas
Otu0152	238	597	0.461283	0.69075	0.877313	Firmicutes	Clostridiaceae	Clostridiaceae_unclassified
Otu0153	210	281	0.360517	0.683782	0.877313	Proteobacteria	Xanthobacteraceae	Xanthobacteraceae_unclassified
Otu0156	1838	815	-0.383309	0.695024	0.877313	Actinobacteriota	Corynebacteriaceae	Lawsonella
Otu0163	314	452	-0.444375	0.67099	0.877313	Actinobacteriota	Microbacteriaceae	Microbacterium
Otu0179	59	83	0.50233	0.665044	0.877313	Deinococcota	Deinococcaceae	Deinococcus
Otu0181	19	53	0.341497	0.715134	0.877313	Actinobacteriota	Bifidobacteriaceae	Bifidobacteriaceae_unclassified
Otu0191	154	190	-0.431348	0.715664	0.877313	Bacteroidota	Crocinitomicaceae	Fluviicola
Otu0207	534	838	-0.466516	0.675162	0.877313	Actinobacteriota	Actinobacteriota_unclassified	Actinobacteriota_unclassified
Otu0220	57	140	0.389975	0.67581	0.877313	Bacteroidota	Saprospiraceae	uncultured
Otu0253	183	157	0.457919	0.717505	0.877313	Proteobacteria	Sphingomonadaceae	Novosphingobium
Otu0256	266	316	0.509017	0.691184	0.877313	Proteobacteria	Rhizobiales_Incertae_Sedis	uncultured
Otu0263	744	526	-0.493716	0.670935	0.877313	Patescibacteria	Gracilibacteria_fa	Gracilibacteria_ge
Otu0279	225	407	0.481493	0.682707	0.877313	Actinobacteriota	Coriobacteriales_unclassified	Coriobacteriales_unclassified
Otu0403	97	200	-0.449201	0.709683	0.877313	Actinobacteriota	Tsukamurellaceae	Tsukamurella
Otu0554	127	212	0.540907	0.665659	0.877313	Patescibacteria	Gracilibacteria_unclassified	Gracilibacteria_unclassified
Otu1141	7	15	0.350065	0.692997	0.877313	Vertebrata	Mammalia_fa	Mammalia_ge
Otu0049	8566	22185	-0.492108	0.731885	0.881386	Firmicutes	Peptostreptococcales-Tissierellales_fa	Finegoldia
Otu0072	1444	3670	-0.401994	0.733942	0.881386	Actinobacteriota	Microbacteriaceae	Rhodoluna
Otu0136	315	392	-0.373982	0.729565	0.881386	Proteobacteria	Xanthomonadaceae	Xanthomonadaceae_unclassified
Otu0169	316	278	-0.429483	0.733507	0.881386	Fusobacteriota	Leptotrichiaceae	Leptotrichia
Otu0329	55	136	-0.408852	0.738601	0.883039	Myxococcota	Myxococcaceae	Myxococcaceae_unclassified
Otu0015	4997	12873	0.428123	0.746082	0.888036	Bacteroidota	Flavobacteriaceae	Flavobacterium
Otu0148	426	1569	0.310981	0.751544	0.889081	Firmicutes	Firmicutes_unclassified	Firmicutes_unclassified
Otu0407	125	187	0.321874	0.75357	0.889081	Campilobacterota	Campylobacterales_unclassified	Campylobacterales_unclassified
Otu0550	32	50	0.249435	0.759493	0.892156	Actinobacteriota	Corynebacteriaceae	Corynebacteriaceae_ge
Otu0044	2233	2784	0.30814	0.778069	0.910002	Proteobacteria	Oxalobacteraceae	Oxalobacteraceae_unclassified
Otu0050	9462	13129	-0.294696	0.786381	0.913606	Firmicutes	Peptostreptococcales-Tissierellales_fa	Peptoniphilus
Otu0245	186	340	0.341895	0.787943	0.913606	Bacteroidota	env.OPS_17	env.OPS_17_ge
Otu0222	190	147	0.321315	0.795945	0.918924	Actinobacteriota	Frankiales_unclassified	Frankiales_unclassified
Otu0013	11849	4751	0.367651	0.80331	0.923463	Proteobacteria	Alteromonadaceae	Rheinheimera
Otu0088	388	437	0.204001	0.812099	0.929595	Proteobacteria	Mitochondria	Mitochondria_ge
Otu0325	607	371	-0.323401	0.819657	0.93427	Bacteroidota	Rikenellaceae	Alistipes
Otu0246	723	354	0.232119	0.831056	0.943266	Firmicutes	Staphylococcaceae	Staphylococcaceae_unclassified
Otu0160	150	135	-0.248146	0.839351	0.944186	Bdellovibrionota	Bacteriovoracaceae	Peredibacter
Otu0354	147	102	0.20492	0.842396	0.944186	Proteobacteria	Cellvibrionales_unclassified	Cellvibrionales_unclassified
Otu0497	13	18	-0.197779	0.835411	0.944186	Bdellovibrionota	Oligoflexia_unclassified	Oligoflexia_unclassified
Otu0187	300	270	0.194249	0.854876	0.950254	Proteobacteria	Oxalobacteraceae	Janthinobacterium
Otu0333	78	97	0.207411	0.853327	0.950254	Chloroflexi	Chloroflexi_unclassified	Chloroflexi_unclassified
Otu0521	46	71	-0.191539	0.86995	0.963031	Actinobacteriota	Coriobacteriia_unclassified	Coriobacteriia_unclassified
Otu0007	16333	30821	0.181876	0.883681	0.965352	Bacteroidota	Flavobacteriaceae	Flavobacteriaceae_unclassified
Otu0040	1137	1715	-0.160296	0.888381	0.965352	Firmicutes	Streptococcaceae	Streptococcaceae_unclassified
Otu0113	2186	13376	0.27677	0.878654	0.965352	Actinobacteriota	Actinomycetaceae	Actinotignum
Otu0211	167	244	0.130459	0.88999	0.965352	Patescibacteria	Candidatus_Kaiserbacteria_fa	Candidatus_Kaiserbacteria_ge
Otu0633	162	85	0.161005	0.88751	0.965352	Firmicutes	Oscillospirales_fa	Oscillospirales_ge
Otu0001	95868	175882	0.226152	0.915884	0.984652	Proteobacteria	Enterobacteriaceae	Enterobacteriaceae_unclassified
Otu0030	3392	5756	-0.109137	0.925805	0.984652	Proteobacteria	Sphingomonadaceae	Sphingomonadaceae_unclassified
Otu0031	6962	15549	0.0683151	0.940164	0.984652	Bacteria_unclassified	Bacteria_unclassified	Bacteria_unclassified
Otu0032	3944	7370	0.0719157	0.937602	0.984652	Proteobacteria	Gammaproteobacteria_unclassified	Gammaproteobacteria_unclassified
Otu0061	1350	3049	0.0801837	0.944387	0.984652	Proteobacteria	Alphaproteobacteria_unclassified	Alphaproteobacteria_unclassified
Otu0071	2088	3184	0.0568369	0.942086	0.984652	Actinobacteriota	Corynebacteriaceae	Corynebacteriaceae_unclassified
Otu0111	974	1193	0.0777634	0.940316	0.984652	Bacteroidota	Bacteroidales_unclassified	Bacteroidales_unclassified
Otu0116	2333	682	-0.108288	0.938326	0.984652	Actinobacteriota	Atopobiaceae	Atopobiaceae_unclassified
Otu0139	264	170	-0.121725	0.924202	0.984652	Actinobacteriota	Atopobiaceae	Atopobium
Otu0166	138	202	-0.0892582	0.932369	0.984652	Actinobacteriota	Nocardioidaceae	Nocardioides
Otu0217	199	277	0.0796332	0.948537	0.98516	Proteobacteria	Comamonadaceae	Acidovorax
Otu0003	13880	22789	0.0372126	0.972435	0.989275	Firmicutes	Streptococcaceae	Streptococcus
Otu0028	3182	1590	0.0475921	0.971484	0.989275	Proteobacteria	Alteromonadales_unclassified	Alteromonadales_unclassified
Otu0038	128	217	-0.0335718	0.977795	0.989275	Proteobacteria	Moraxellaceae	Psychrobacter
Otu0066	772	320	0.0377525	0.978242	0.989275	Proteobacteria	Alteromonadaceae	Alteromonadaceae_unclassified
Otu0067	737	3005	-0.0400743	0.971575	0.989275	Bacteroidota	Bacteroidia_unclassified	Bacteroidia_unclassified
Otu0091	986	10445	0.0773424	0.961422	0.989275	Firmicutes	Veillonellaceae	Negativicoccus
Otu0311	184	231	0.036244	0.976321	0.989275	Firmicutes	Anaerovoracaceae	Anaerovoracaceae_unclassified
Otu0017	37952	51045	-0.0167218	0.986569	0.993959	Actinobacteriota	Propionibacteriaceae	Cutibacterium
Otu0036	5523	13695	0.0118825	0.992725	0.996429	Cyanobacteria	Cyanobacteriia_unclassified	Cyanobacteriia_unclassified
Otu0080	604	179	-0.00477941	0.997005	0.997005	Bacteroidota	Weeksellaceae	Cloacibacterium

## Sheet: legend
Legend
OTU	Operational taxonomic unit
adjPvalues	Adjusted p value
