# Supplementary figures and images for: Microbiome Sex-Related Diversity in Non-Muscle-Invasive Urothelial Bladder Cancer
Source: MDPI journal article supplement (doi:10.3390/cimb46040225), 2024-04-19

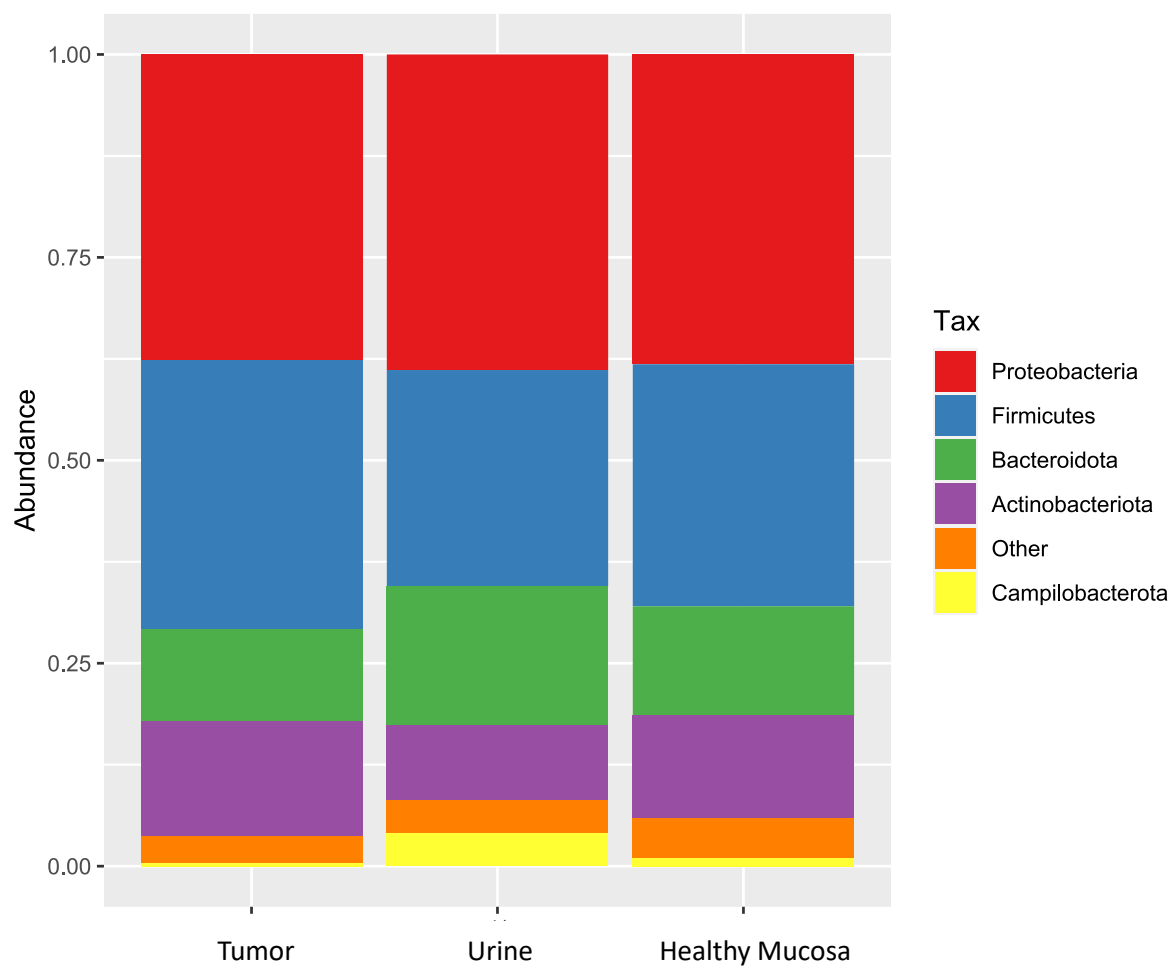

Supplement: s1 [file s1]
